# Supplementary material
Source: publisher figshare collection journal article supplement (https://gsajournals.figshare.com/ndownloader/files/12281276)
Supplement: Supplementary file 1 [file 12281276]

## Sheet: hits.score.75perc.cons.2.0916
space	start	end	width	entrezid	TF	score	strand	match	pv	bh	cons
chr2L	1328004	1328016	13	a5_1329161	>blimp-1	0.77	-	# GTAGCGAAAGGA	0.83555333	0.997896845	2766923008
chr2L	8382581	8382593	13	Aats-ala_8381588	>blimp-1	0.76	+	# GAAGTGTGAGTG	0.904056084	0.997896845	231230769
chr2L	11233586	11233598	13	ab_11234851	>blimp-1	0.76	+	# GTTTTGAAAGTT	0.904056084	0.997896845	207923078
chr2L	11233927	11233939	13	ab_11234851	>blimp-1	0.75	+	# GTGATGAAATTG	0.942814221	0.997896845	3703230775
chr2L	19044141	19044153	13	Acn_19045355	>blimp-1	0.83	-	# GTATTGAAGGTG	0.276815223	0.997896845	3333230793
chr2L	7742137	7742149	13	Acp1_7741537	>blimp-1	0.84	+	# GTAATTAAAGTG	0.236154231	0.997896845	2853538385
chr2L	7742115	7742127	13	Acp1_7741537	>blimp-1	0.77	+	# GGAGTGAAAATC	0.83555333	0.997896845	2901230716
chr2L	7741614	7741626	13	Acp1_7741537	>blimp-1	0.76	-	# TTCATGAAAGTG	0.904056084	0.997896845	2521692308
chr2L	5895551	5895563	13	Acp26Aa_5893896	>blimp-1	0.81	+	# ACAGTAAAAGTG	0.374862293	0.997896845	3084076836
chr2L	11992210	11992222	13	Ada1-2_11992902	>blimp-1	0.92	-	# GTAGTCAAAGTG	0.014922384	0.997896845	2577307679
chr2L	11992030	11992042	13	Ada1-2_11992902	>blimp-1	0.76	-	# GTCCGGAAAGTG	0.904056084	0.997896845	3066923045
chr2L	13811722	13811734	13	adat_13811474	>blimp-1	0.75	+	# GTAGTAAATGTT	0.942814221	0.997896845	3694230821
chr2L	6047527	6047539	13	ade2_6045596	>blimp-1	0.77	+	# GCAGTCCAAGTG	0.83555333	0.997896845	3154615352
chr2L	8425391	8425403	13	Akap200_8426773	>blimp-1	0.76	+	# GTATTTAAATTG	0.904056084	0.997896845	2962999967
chr2L	376292	376304	13	al_378112	>blimp-1	0.81	-	# AAAGTGAAAGAG	0.374862293	0.997896845	2162153853
chr2L	13908183	13908195	13	Ance-2_13909333	>blimp-1	0.77	-	# ATACTGAATGTG	0.83555333	0.997896845	3913923009
chr2L	13912840	13912852	13	Ance-3_13914725	>blimp-1	0.75	+	# GTAATTAAAATG	0.942814221	0.997896845	2779615379
chr2L	2180002	2180014	13	aop_2178754	>blimp-1	0.76	+	# GCAGTGCAACTG	0.904056084	0.997896845	2842999999
chr2L	413388	413400	13	AP-2alpha_412885	>blimp-1	0.78	+	# GAACTGTAAGTG	0.735302954	0.997896845	4208461475
chr2L	12222145	12222157	13	aret_12222197	>blimp-1	0.8	+	# TCAGTCAAAGTG	0.450375563	0.997896845	2459923157
chr2L	12269625	12269637	13	aret_12270932	>blimp-1	0.78	-	# TTAGTTAAAGTT	0.735302954	0.997896845	2225923107
chr2L	12199631	12199643	13	aret_12201326	>blimp-1	0.82	+	# AAAGTGAAAGTA	0.316875313	0.997896845	3373769279
chr2L	20415996	20416008	13	Arpc2_20417090	>blimp-1	0.76	+	# GTCGTTAAAGTA	0.904056084	0.997896845	315400005
chr2L	6124625	6124637	13	Arpc4_6125132	>blimp-1	0.78	+	# ATAATAAAAGTG	0.735302954	0.997896845	2521846159
chr2L	2578917	2578929	13	Arpc5_2580292	>blimp-1	0.81	-	# GTAGTGATGGTG	0.374862293	0.997896845	2586538447
chr2L	4280763	4280775	13	Art2_4279315	>blimp-1	0.75	+	# GTCGTAAAAATG	0.942814221	0.997896845	3170076907
chr2L	869763	869775	13	aru_868354	>blimp-1	0.8	+	# TGAGCGAAAGTG	0.450375563	0.997896845	3144230723
chr2L	11086898	11086910	13	AstCC_11085229	>blimp-1	0.86	-	# GTATCGAAAGTG	0.119479219	0.997896845	3034153876
chr2L	1080368	1080380	13	Atg4a_1080911	>blimp-1	0.76	-	# GTAGAGAAAGGC	0.904056084	0.997896845	2524461597
chr2L	1079552	1079564	13	Atg4a_1080911	>blimp-1	0.88	-	# GAAGGGAAAGTG	0.041161743	0.997896845	2180846187
chr2L	11002840	11002852	13	aub_11001476	>blimp-1	0.78	-	# TTATTGAAAGTT	0.735302954	0.997896845	2838615381
chr2L	9252917	9252929	13	aust_9251042	>blimp-1	0.78	+	# GAAGAGAAGGTG	0.735302954	0.997896845	2400076912
chr2L	17130277	17130289	13	beat-IIIa_17131024	>blimp-1	0.79	+	# ACAGTGACAGTG	0.572058087	0.997896845	243738466
chr2L	16971477	16971489	13	beat-IIIb_16973091	>blimp-1	0.8	+	# TAAGTAAAAGTG	0.450375563	0.997896845	3586461517
chr2L	4944583	4944595	13	betaggt-I_4945579	>blimp-1	0.77	-	# GGCGAGAAAGTG	0.83555333	0.997896845	2769461565
chr2L	14011205	14011217	13	bgm_14013004	>blimp-1	0.77	-	# GCAATGAACGTG	0.83555333	0.997896845	2609999974
chr2L	9983384	9983396	13	bib_9984645	>blimp-1	0.78	-	# GCTGTGAAAGTT	0.735302954	0.997896845	320753855
chr2L	16044068	16044080	13	BicC_16044552	>blimp-1	0.77	-	# TTATTGAAAGAG	0.83555333	0.997896845	309530778
chr2L	16041275	16041287	13	BicC_16042047	>blimp-1	0.84	+	# GTTGTGAAAGTT	0.236154231	0.997896845	4094769203
chr2L	3770301	3770313	13	bowl_3771700	>blimp-1	0.75	-	# GTAATTAAGGTG	0.942814221	0.997896845	2822923057
chr2L	12347117	12347129	13	bru-2_12348117	>blimp-1	0.78	+	# GTATGTAAAGTG	0.735302954	0.997896845	2540615402
chr2L	10251129	10251141	13	bsk_10249742	>blimp-1	0.81	-	# GTAGTGATCGTG	0.374862293	0.997896845	2167538493
chr2L	8301537	8301549	13	Btk29A_8300746	>blimp-1	0.8	+	# GAAGGAAAAGTG	0.450375563	0.997896845	2502000092
chr2L	8275759	8275771	13	Btk29A_8274224	>blimp-1	0.78	+	# GCACTAAAAGTG	0.735302954	0.997896845	2300769212
chr2L	17982529	17982541	13	btv_17982472	>blimp-1	0.81	+	# AAAGTGAAAGAG	0.374862293	0.997896845	2419615395
chr2L	16302443	16302455	13	c(2)M_16303264	>blimp-1	0.86	-	# GCAGTGAAAGTC	0.119479219	0.997896845	3373230831
chr2L	16168301	16168313	13	Ca-alpha1D_16168346	>blimp-1	0.77	-	# GCCGTGAAAATG	0.83555333	0.997896845	2189153841
chr2L	16327333	16327345	13	cact_16325420	>blimp-1	0.84	-	# GTAGTGAAAGAA	0.236154231	0.997896845	2133923097
chr2L	17876391	17876403	13	CadN2_17875247	>blimp-1	0.76	-	# GTAATGAAATTT	0.904056084	0.997896845	4009153815
chr2L	17843650	17843662	13	CadN2_17843608	>blimp-1	0.83	-	# GTACTGAAAATG	0.276815223	0.997896845	2023769235
chr2L	13801782	13801794	13	CAH1_13803626	>blimp-1	0.78	-	# GAAATGAAAATG	0.735302954	0.997896845	240030772
chr2L	11268237	11268249	13	cana_11269780	>blimp-1	0.76	-	# ATTGTGAATGTG	0.904056084	0.997896845	229761539
chr2L	16825969	16825981	13	Cas_16825207	>blimp-1	0.84	-	# GGAGTGAATGTG	0.236154231	0.997896845	281592308
chr2L	59953	59965	13	Cda5_59268	>blimp-1	0.8	-	# GAATTGAAAGTA	0.450375563	0.997896845	2775538426
chr2L	20457493	20457505	13	Cdc23_20459342	>blimp-1	0.77	+	# ATAGAGACAGTG	0.83555333	0.997896845	3492461594
chr2L	20457772	20457784	13	Cdc23_20459342	>blimp-1	0.86	-	# GCTGTGAAAGTG	0.119479219	0.997896845	3250384668
chr2L	10312851	10312863	13	Cdk5alpha_10310956	>blimp-1	0.84	-	# GTATTGAAAGCG	0.236154231	0.997896845	3781230694
chr2L	13892482	13892494	13	CenG1A_13894202	>blimp-1	0.79	+	# AGGGTGAAAGTG	0.572058087	0.997896845	3263999976
chr2L	13894052	13894064	13	CenG1A_13894202	>blimp-1	0.82	-	# GTTGTGAAAATG	0.316875313	0.997896845	3520000027
chr2L	3866368	3866380	13	Cep97_3867697	>blimp-1	0.86	-	# GTAGCGAAAGTT	0.119479219	0.997896845	239623078
chr2L	4883335	4883347	13	Cf2_4883107	>blimp-1	0.75	+	# GTTGTGAAATTA	0.942814221	0.997896845	2089769246
chr2L	19454980	19454992	13	CG10026_19455678	>blimp-1	0.92	+	# GTAATGAAAGTG	0.014922384	0.997896845	2231692342
chr2L	19531497	19531509	13	CG10165_19530305	>blimp-1	0.75	+	# TTCGTGATAGTG	0.942814221	0.997896845	2078307697
chr2L	19527776	19527788	13	CG10166_19526368	>blimp-1	0.77	-	# GGTGTTAAAGTG	0.83555333	0.997896845	2539846219
chr2L	18483952	18483964	13	CG10176_18485417	>blimp-1	0.75	+	# GTTGTGAAATTA	0.942814221	0.997896845	3476000045
chr2L	18484238	18484250	13	CG10176_18485417	>blimp-1	0.79	-	# AGTGTGAAAGTG	0.572058087	0.997896845	3198307716
chr2L	19518995	19519007	13	CG10186_19517204	>blimp-1	0.76	+	# GTCGGAAAAGTG	0.904056084	0.997896845	2207384648
chr2L	19519063	19519075	13	CG10186_19517204	>blimp-1	0.8	-	# AAAGTGCAAGTG	0.450375563	0.997896845	322600008
chr2L	19508971	19508983	13	CG10188_19508764	>blimp-1	0.78	-	# TTATTGAAAGTA	0.735302954	0.997896845	3095461488
chr2L	19509348	19509360	13	CG10188_19508764	>blimp-1	0.79	-	# CAAGTGAACGTG	0.572058087	0.997896845	3237846161
chr2L	18515952	18515964	13	CG10211_18517487	>blimp-1	0.78	-	# TTATAGAAAGTG	0.735302954	0.997896845	2275384575
chr2L	19444225	19444237	13	CG10237_19442727	>blimp-1	0.76	-	# GCAGTGACATTG	0.904056084	0.997896845	2615769214
chr2L	19444347	19444359	13	CG10237_19442727	>blimp-1	0.79	-	# GAAGTCAAAGTC	0.572058087	0.997896845	2177923104
chr2L	19581827	19581839	13	CG10268_19580351	>blimp-1	0.91	-	# GTGGTGAAAGTG	0.02203305	0.997896845	3676692295
chr2L	19547445	19547457	13	CG10337_19546959	>blimp-1	0.82	-	# GTTGTGAAATTG	0.316875313	0.997896845	2015692303
chr2L	18694179	18694191	13	CG10338_18695664	>blimp-1	0.76	-	# TTTGTAAAAGTG	0.904056084	0.997896845	2784769191
chr2L	19583061	19583073	13	CG10366_19584235	>blimp-1	0.76	+	# GTATCGAATGTG	0.904056084	0.997896845	325546161
chr2L	19583158	19583170	13	CG10366_19584235	>blimp-1	0.75	+	# TTGGTGAAGGTG	0.942814221	0.997896845	2459769246
chr2L	19583607	19583619	13	CG10366_19584235	>blimp-1	0.78	+	# GCAGTGAAACTT	0.735302954	0.997896845	2341307719
chr2L	6958511	6958523	13	CG10399_6960377	>blimp-1	0.78	-	# ATACTGAAAGTC	0.735302954	0.997896845	281823075
chr2L	18973155	18973167	13	CG10431_18974710	>blimp-1	0.77	-	# GAAGTGAAGCTG	0.83555333	0.997896845	2485846178
chr2L	19052768	19052780	13	CG10492_19054078	>blimp-1	0.77	-	# ATAGTGCAAGTA	0.83555333	0.997896845	3533307635
chr2L	19062336	19062348	13	CG10495_19063295	>blimp-1	0.76	+	# GTGGGCAAAGTG	0.904056084	0.997896845	2959384587
chr2L	19062478	19062490	13	CG10495_19063295	>blimp-1	0.77	+	# GCAGTTCAAGTG	0.83555333	0.997896845	4005615361
chr2L	19112407	19112419	13	CG10561_19114401	>blimp-1	0.78	+	# TGGGTGAAAGTG	0.735302954	0.997896845	2387999988
chr2L	18959229	18959241	13	CG10623_18957311	>blimp-1	0.75	+	# GTGATCAAAGTG	0.942814221	0.997896845	2530923101
chr2L	19080176	19080188	13	CG10700_19079028	>blimp-1	0.75	-	# GTAGCGCAAGAG	0.942814221	0.997896845	3560999925
chr2L	20090619	20090631	13	CG10721_20091612	>blimp-1	0.77	+	# GGCGTAAAAGTG	0.83555333	0.997896845	2887230742
chr2L	1589110	1589122	13	CG10869_1587155	>blimp-1	0.75	+	# GTTGAGAAATTG	0.942814221	0.997896845	3025615426
chr2L	2217462	2217474	13	CG10880_2216311	>blimp-1	0.75	+	# GTCGGGAAAATG	0.942814221	0.997896845	2203153852
chr2L	20418672	20418684	13	CG10949_20416918	>blimp-1	0.79	-	# GGAGCCAAAGTG	0.572058087	0.997896845	2173846135
chr2L	20418835	20418847	13	CG10949_20416918	>blimp-1	0.85	-	# GGAGTCAAAGTG	0.170255383	0.997896845	3047692271
chr2L	6609412	6609424	13	CG11050_6611406	>blimp-1	0.76	+	# TTAATGAAAGAG	0.904056084	0.997896845	3394461531
chr2L	5721920	5721932	13	CG11149_5720540	>blimp-1	0.76	-	# GTGGCGAAAGGG	0.904056084	0.997896845	2480307655
chr2L	6772778	6772790	13	CG11321_6772614	>blimp-1	0.87	+	# GCAGTAAAAGTG	0.067100651	0.997896845	2854384665
chr2L	6687068	6687080	13	CG11327_6686712	>blimp-1	0.77	+	# GCAGTACAAGTG	0.83555333	0.997896845	3295538462
chr2L	75657	75669	13	CG11374_76348	>blimp-1	0.78	+	# GAAGGGAGAGTG	0.735302954	0.997896845	2200999964
chr2L	101113	101125	13	CG11377_102380	>blimp-1	0.85	-	# GTATGGAAAGTG	0.170255383	0.997896845	3587230844
chr2L	112959	112971	13	CG11455_114726	>blimp-1	0.76	+	# GTTGTTAAAGTA	0.904056084	0.997896845	3580000015
chr2L	283906	283918	13	CG11601_283269	>blimp-1	0.77	+	# GAAGTGAAGTTG	0.83555333	0.997896845	2821461584
chr2L	283953	283965	13	CG11601_283269	>blimp-1	0.79	-	# GCAGGTAAAGTG	0.572058087	0.997896845	2947153872
chr2L	209002	209014	13	CG11617_207297	>blimp-1	0.77	-	# GGAGCGCAAGTG	0.83555333	0.997896845	3461615446
chr2L	2149251	2149263	13	CG11723_2147275	>blimp-1	0.8	+	# GAAGGGAAAGTT	0.450375563	0.997896845	3026153809
chr2L	320149	320161	13	CG11912_319259	>blimp-1	0.78	+	# GCAATGAAAGTC	0.735302954	0.997896845	2007769211
chr2L	4681051	4681063	13	CG11929_4682677	>blimp-1	0.77	+	# GAAGTGTAAATG	0.83555333	0.997896845	3676769229
chr2L	16903275	16903287	13	CG12288_16902218	>blimp-1	0.76	+	# GCAGTGACAATG	0.904056084	0.997896845	3296076986
chr2L	3146926	3146938	13	CG12400_3145721	>blimp-1	0.77	-	# GTAATTAAAGTT	0.83555333	0.997896845	2226846159
chr2L	13001130	13001142	13	CG12404_13000635	>blimp-1	0.75	+	# GTAGCGCAAATG	0.942814221	0.997896845	2358076916
chr2L	5676643	5676655	13	CG12511_5678582	>blimp-1	0.76	-	# GTGGATAAAGTG	0.904056084	0.997896845	2967923068
chr2L	20293603	20293615	13	CG12617_20294693	>blimp-1	0.76	+	# GTAGCTTAAGTG	0.904056084	0.997896845	2021769216
chr2L	19423000	19423012	13	CG13085_19424050	>blimp-1	0.75	+	# TTAGTGGAAATG	0.942814221	0.997896845	2530923133
chr2L	19423012	19423024	13	CG13085_19424050	>blimp-1	0.77	+	# CTAATGAAATTG	0.83555333	0.997896845	2235538502
chr2L	8488179	8488191	13	CG13088_8488981	>blimp-1	0.78	-	# GAAGGGAACGTG	0.735302954	0.997896845	3061846178
chr2L	8518797	8518809	13	CG13091_8519690	>blimp-1	0.76	+	# GCTGTGAATGTG	0.904056084	0.997896845	2352230754
chr2L	8518053	8518065	13	CG13091_8519690	>blimp-1	0.79	-	# GCGGTGAAAGTT	0.572058087	0.997896845	2911769198
chr2L	8515338	8515350	13	CG13097_8514868	>blimp-1	0.76	-	# GCAGTGCAAGAG	0.904056084	0.997896845	2688307711
chr2L	9728885	9728897	13	CG13116_9729940	>blimp-1	0.75	+	# GTAGGGCAAGTC	0.942814221	0.997896845	2733846173
chr2L	9728033	9728045	13	CG13116_9729940	>blimp-1	0.86	-	# ATAATGAAAGTG	0.119479219	0.997896845	226815386
chr2L	9736037	9736049	13	CG13117_9736645	>blimp-1	0.76	-	# TTAGTAAAATTG	0.904056084	0.997896845	2933153909
chr2L	10025410	10025422	13	CG13127_10026676	>blimp-1	0.76	+	# GTATTAAAAATG	0.904056084	0.997896845	2715999995
chr2L	10018060	10018072	13	CG13131_10017463	>blimp-1	0.79	-	# TAAGTGAAAATG	0.572058087	0.997896845	2095692314
chr2L	15915494	15915506	13	CG13244_15916888	>blimp-1	0.78	+	# ATTGTTAAAGTG	0.735302954	0.997896845	3692692326
chr2L	16803031	16803043	13	CG13272_16804884	>blimp-1	0.77	-	# GGAGGGAATGTG	0.83555333	0.997896845	3099999983
chr2L	16806989	16807001	13	CG13272_16807316	>blimp-1	0.76	+	# GTAGTGAAAAGT	0.904056084	0.997896845	2248692346
chr2L	16822711	16822723	13	CG13280_16821093	>blimp-1	0.76	+	# GTAATGAAAGGT	0.904056084	0.997896845	3862000003
chr2L	6908630	6908642	13	CG13773_6907844	>blimp-1	0.85	+	# GGAGTCAAAGTG	0.170255383	0.997896845	318807697
chr2L	7221607	7221619	13	CG13784_7220033	>blimp-1	0.91	-	# GTGGTGAAAGTG	0.02203305	0.997896845	2737846177
chr2L	7727405	7727417	13	CG13795_7726298	>blimp-1	0.78	-	# ATAATAAAAGTG	0.735302954	0.997896845	3039230805
chr2L	6137589	6137601	13	CG13991_6139382	>blimp-1	0.76	+	# GTAATGAAATTT	0.904056084	0.997896845	2076846114
chr2L	6067327	6067339	13	CG13993_6069079	>blimp-1	0.77	-	# GTATACAAAGTG	0.83555333	0.997896845	2477846133
chr2L	6052873	6052885	13	CG13995_6054302	>blimp-1	0.79	-	# AGACTGAAAGTG	0.572058087	0.997896845	3168076902
chr2L	5581513	5581525	13	CG14011_5581116	>blimp-1	0.76	-	# GTCACGAAAGTG	0.904056084	0.997896845	3062999973
chr2L	5516942	5516954	13	CG14020_5517737	>blimp-1	0.76	-	# GTGTTGAAAGCG	0.904056084	0.997896845	2913769226
chr2L	5516483	5516495	13	CG14020_5517737	>blimp-1	0.75	-	# GTGGTAAAAATG	0.942814221	0.997896845	2766538446
chr2L	5218199	5218211	13	CG14034_5216542	>blimp-1	0.75	+	# TTAGTGGAAGCG	0.942814221	0.997896845	2783999966
chr2L	4970100	4970112	13	CG14043_4971702	>blimp-1	0.88	+	# GAAGAGAAAGTG	0.041161743	0.997896845	3500615404
chr2L	10911229	10911241	13	CG14069_10910648	>blimp-1	0.78	+	# ATAATGAAAGGG	0.735302954	0.997896845	2734769266
chr2L	8341841	8341853	13	CG14273_8342695	>blimp-1	0.76	+	# TTAGTAAATGTG	0.904056084	0.997896845	2481846149
chr2L	8336360	8336372	13	CG14274_8338287	>blimp-1	0.75	+	# GTTGTAAAAGTC	0.942814221	0.997896845	2816307701
chr2L	1164713	1164725	13	CG14341_1166506	>blimp-1	0.78	+	# GAACTGAAGGTG	0.735302954	0.997896845	2275461538
chr2L	1166354	1166366	13	CG14341_1166506	>blimp-1	0.77	+	# GTATTGAAAATT	0.83555333	0.997896845	2210461571
chr2L	21090714	21090726	13	CG14397_21091227	>blimp-1	0.76	-	# TTAGTGAAAAAG	0.904056084	0.997896845	2463230802
chr2L	20868424	20868436	13	CG14401_20869854	>blimp-1	0.76	-	# GTATTTAAAATG	0.904056084	0.997896845	2491923126
chr2L	7855423	7855435	13	CG14535_7855255	>blimp-1	0.79	+	# AGAGTGAAAGTC	0.572058087	0.997896845	227800008
chr2L	11344700	11344712	13	CG14926_11343238	>blimp-1	0.76	+	# TTATTGAAGGTG	0.904056084	0.997896845	213046154
chr2L	11787779	11787791	13	CG14931_11788334	>blimp-1	0.79	+	# GCAGCGAAAATG	0.572058087	0.997896845	2020000044
chr2L	11795095	11795107	13	CG14937_11794086	>blimp-1	0.76	-	# GTATTCAAAATG	0.904056084	0.997896845	3005923133
chr2L	12048205	12048217	13	CG14945_12049418	>blimp-1	0.76	-	# GTACAGAAAATG	0.904056084	0.997896845	2708692271
chr2L	20426199	20426211	13	CG15130_20424660	>blimp-1	0.78	+	# GAACTGAAACTG	0.735302954	0.997896845	3118692283
chr2L	20425250	20425262	13	CG15130_20424660	>blimp-1	0.78	+	# GTATGTAAAGTG	0.735302954	0.997896845	2124769188
chr2L	17285051	17285063	13	CG15140_17286240	>blimp-1	0.78	+	# ATAATGAAAGTA	0.735302954	0.997896845	2479461505
chr2L	17285413	17285425	13	CG15140_17286240	>blimp-1	0.81	+	# CAAGTGAAAGTT	0.374862293	0.997896845	2504230761
chr2L	17285789	17285801	13	CG15140_17286240	>blimp-1	0.78	-	# TTAGCGAAAATG	0.735302954	0.997896845	2276538473
chr2L	17529978	17529990	13	CG15144_17529122	>blimp-1	0.86	+	# ATAGTGAAAGCG	0.119479219	0.997896845	2270000031
chr2L	17627164	17627176	13	CG15147_17626381	>blimp-1	0.78	-	# TTATTGAAAGTA	0.735302954	0.997896845	3186923082
chr2L	18617403	18617415	13	CG15161_18616106	>blimp-1	0.76	-	# GAAGTGACTGTG	0.904056084	0.997896845	2022769199
chr2L	18986671	18986683	13	CG15168_18987707	>blimp-1	0.75	+	# GTATTGAAGGTC	0.942814221	0.997896845	4074076953
chr2L	15618114	15618126	13	CG15253_15616351	>blimp-1	0.83	-	# GTAGAGGAAGTG	0.276815223	0.997896845	2373153834
chr2L	15612672	15612684	13	CG15255_15611719	>blimp-1	0.77	+	# ATTATGAAAGTG	0.83555333	0.997896845	2878230713
chr2L	15362537	15362549	13	CG15258_15361627	>blimp-1	0.78	-	# TGGGTGAAAGTG	0.735302954	0.997896845	3313846258
chr2L	15293747	15293759	13	CG15260_15292239	>blimp-1	0.81	-	# TAATTGAAAGTG	0.374862293	0.997896845	3628846224
chr2L	14852188	14852200	13	CG15279_14851749	>blimp-1	0.8	+	# AAAGTGTAAGTG	0.450375563	0.997896845	3254076958
chr2L	14849274	14849286	13	CG15279_14849188	>blimp-1	0.75	+	# CTCGTGACAGTG	0.942814221	0.997896845	2562384647
chr2L	14711834	14711846	13	CG15282_14712665	>blimp-1	0.86	-	# GAAGTGAAATTG	0.119479219	0.997896845	2018923087
chr2L	14452198	14452210	13	CG15283_14450922	>blimp-1	0.79	-	# GAATTGAAACTG	0.572058087	0.997896845	2876076978
chr2L	2697613	2697625	13	CG15398_2696437	>blimp-1	0.78	-	# TGGGTGAAAGTG	0.735302954	0.997896845	2119230752
chr2L	3492560	3492572	13	CG15414_3491071	>blimp-1	0.79	+	# GATTTGAAAGTG	0.572058087	0.997896845	3065307647
chr2L	4443031	4443043	13	CG15431_4441282	>blimp-1	0.78	+	# GGACTGAAAGTT	0.735302954	0.997896845	284492312
chr2L	4442818	4442830	13	CG15431_4441282	>blimp-1	0.78	+	# GATGTCAAAGTG	0.735302954	0.997896845	38727692
chr2L	13225331	13225343	13	CG15480_13225275	>blimp-1	0.75	+	# TTAATGATAGTG	0.942814221	0.997896845	2959769241
chr2L	12763418	12763430	13	CG15483_12761840	>blimp-1	0.77	+	# GTAGACAAAGTA	0.83555333	0.997896845	2162615383
chr2L	12763620	12763632	13	CG15483_12761840	>blimp-1	0.81	-	# AAGGTGAAAGTG	0.374862293	0.997896845	2359384638
chr2L	12670496	12670508	13	CG15485_12669354	>blimp-1	0.78	+	# TTAGAAAAAGTG	0.735302954	0.997896845	2922999996
chr2L	12671088	12671100	13	CG15485_12669354	>blimp-1	0.78	-	# TTATTGAAAGTC	0.735302954	0.997896845	2102461523
chr2L	4888505	4888517	13	CG15625_4889995	>blimp-1	0.81	+	# TCAGCGAAAGTG	0.374862293	0.997896845	2593999986
chr2L	4820299	4820311	13	CG15628_4821774	>blimp-1	0.76	-	# GTAATTAAAGCG	0.904056084	0.997896845	2506307656
chr2L	4812842	4812854	13	CG15629_4813009	>blimp-1	0.76	+	# GTTAAGAAAGTG	0.904056084	0.997896845	2229076907
chr2L	13535967	13535979	13	CG15638_13535778	>blimp-1	0.77	+	# GTAATTAAAGTT	0.83555333	0.997896845	3356153965
chr2L	818764	818776	13	CG15880_817950	>blimp-1	0.75	+	# TTGGTGAATGTG	0.942814221	0.997896845	2365230824
chr2L	10971485	10971497	13	CG16743_10972280	>blimp-1	0.76	-	# GTAACGAATGTG	0.904056084	0.997896845	2297076927
chr2L	20382637	20382649	13	CG16798_20382356	>blimp-1	0.82	+	# AAAGGGAAAGTG	0.316875313	0.997896845	2253384613
chr2L	12964976	12964988	13	CG16800_12966590	>blimp-1	0.8	+	# CAAGTGAAAATG	0.450375563	0.997896845	2613769218
chr2L	13222005	13222017	13	CG16812_13222587	>blimp-1	0.75	+	# GTACTGACAGTT	0.942814221	0.997896845	4365538456
chr2L	13227890	13227902	13	CG16815_13229832	>blimp-1	0.8	+	# GAAGCGAAAGCG	0.450375563	0.997896845	2679538491
chr2L	13292869	13292881	13	CG16824_13293009	>blimp-1	0.75	+	# AAATTGAAAGTT	0.942814221	0.997896845	2863769233
chr2L	13303280	13303292	13	CG16825_13304788	>blimp-1	0.75	+	# GTAGTTATAGTT	0.942814221	0.997896845	2021153844
chr2L	10987825	10987837	13	CG16833_10989401	>blimp-1	0.8	+	# CAAGTGAAAATG	0.450375563	0.997896845	2243461503
chr2L	10988039	10988051	13	CG16833_10989401	>blimp-1	0.77	+	# TTATTGAAATTG	0.83555333	0.997896845	3287692272
chr2L	4323930	4323942	13	CG16857_4324554	>blimp-1	0.75	+	# GTAATGAAATTC	0.942814221	0.997896845	2035076941
chr2L	13789422	13789434	13	CG16863_13790959	>blimp-1	0.78	-	# GTAGCCAAAGTA	0.735302954	0.997896845	2506307714
chr2L	13811174	13811186	13	CG16865_13811522	>blimp-1	0.77	+	# GTATAGAAAGCG	0.83555333	0.997896845	2194615392
chr2L	14102630	14102642	13	CG16879_14104483	>blimp-1	0.78	-	# GCATTGAAATTG	0.735302954	0.997896845	369346156
chr2L	13949036	13949048	13	CG16884_13947476	>blimp-1	0.77	-	# GGCGTAAAAGTG	0.83555333	0.997896845	293823079
chr2L	13784512	13784524	13	CG16890_13783460	>blimp-1	0.75	+	# GTAGTAAATGTA	0.942814221	0.997896845	2130230746
chr2L	6466811	6466823	13	CG16947_6465669	>blimp-1	0.82	+	# GTGGTGTAAGTG	0.316875313	0.997896845	231300005
chr2L	13415153	13415165	13	CG16956_13414575	>blimp-1	0.82	+	# AAAGTGAAAGTA	0.316875313	0.997896845	373161547
chr2L	13415092	13415104	13	CG16956_13414575	>blimp-1	0.79	-	# TCAGTGAAATTG	0.572058087	0.997896845	3657384643
chr2L	11979785	11979797	13	CG16965_11981591	>blimp-1	0.79	-	# GAAGTCAAAGCG	0.572058087	0.997896845	2133230734
chr2L	2307121	2307133	13	CG16995_2307948	>blimp-1	0.77	+	# GTAGCGAAACTT	0.83555333	0.997896845	2174538461
chr2L	12355832	12355844	13	CG17010_12356441	>blimp-1	0.81	+	# CAACTGAAAGTG	0.374862293	0.997896845	2448615368
chr2L	279413	279425	13	CG17078_278234	>blimp-1	0.79	+	# GAGGTGAAAGTA	0.572058087	0.997896845	3747230832
chr2L	279800	279812	13	CG17078_278234	>blimp-1	0.77	-	# ATAATGTAAGTG	0.83555333	0.997896845	3566846152
chr2L	280134	280146	13	CG17078_278234	>blimp-1	0.86	-	# GAAGTGAAAATG	0.119479219	0.997896845	3162076996
chr2L	10645669	10645681	13	CG17097_10646415	>blimp-1	0.78	-	# GAAGTCGAAGTG	0.735302954	0.997896845	2406307703
chr2L	10649957	10649969	13	CG17098_10651613	>blimp-1	0.78	-	# GAAGTCGAAGTG	0.735302954	0.997896845	230546151
chr2L	10677115	10677127	13	CG17104_10677817	>blimp-1	0.79	+	# GCGTTGAAAGTG	0.572058087	0.997896845	2574307634
chr2L	10677121	10677133	13	CG17104_10677817	>blimp-1	0.81	+	# AAAGTGAAATTG	0.374862293	0.997896845	2997307635
chr2L	10769251	10769263	13	CG17127_10770931	>blimp-1	0.76	+	# ATAGTGAGAATG	0.904056084	0.997896845	2408615373
chr2L	10770780	10770792	13	CG17127_10770931	>blimp-1	0.78	+	# GAAATGAAAGAG	0.735302954	0.997896845	2220384642
chr2L	10819710	10819722	13	CG17134_10820705	>blimp-1	0.75	-	# GTTGTCAAAGGG	0.942814221	0.997896845	2029615378
chr2L	10847467	10847479	13	CG17139_10845664	>blimp-1	0.78	+	# TTAGCGAAATTG	0.735302954	0.997896845	2489923042
chr2L	3038400	3038412	13	CG17221_3040112	>blimp-1	0.76	-	# TTGGTGAAAGAG	0.904056084	0.997896845	2134153829
chr2L	8369227	8369239	13	CG17292_8370530	>blimp-1	0.78	+	# GAACTGAATGTG	0.735302954	0.997896845	2244307682
chr2L	8370072	8370084	13	CG17292_8370530	>blimp-1	0.75	+	# GTAGTGAAACAA	0.942814221	0.997896845	2427692251
chr2L	8376386	8376398	13	CG17294_8377035	>blimp-1	0.76	+	# GTGGTTAAAGTT	0.904056084	0.997896845	3245230756
chr2L	8376466	8376478	13	CG17294_8377035	>blimp-1	0.78	-	# GCAATGAAAGGG	0.735302954	0.997896845	282853845
chr2L	18843490	18843502	13	CG17321_18845184	>blimp-1	0.76	+	# GTTGCCAAAGTG	0.904056084	0.997896845	2031999989
chr2L	18822058	18822070	13	CG17323_18823548	>blimp-1	0.75	-	# GTTGAGAAACTG	0.942814221	0.997896845	3658076905
chr2L	18818311	18818323	13	CG17324_18819344	>blimp-1	0.77	+	# ATTGTCAAAGTG	0.83555333	0.997896845	2736999998
chr2L	16299430	16299442	13	CG17328_16299943	>blimp-1	0.79	+	# ATAGTTAAAGTA	0.572058087	0.997896845	2130230798
chr2L	14133358	14133370	13	CG17341_14134491	>blimp-1	0.84	-	# GTTGCGAAAGTG	0.236154231	0.997896845	2705615417
chr2L	19064288	19064300	13	CG17343_19064929	>blimp-1	0.76	-	# GTGGTGAAAGCA	0.904056084	0.997896845	2482615387
chr2L	19369087	19369099	13	CG17349_19370445	>blimp-1	0.85	+	# TTAATGAAAGTG	0.170255383	0.997896845	3775692225
chr2L	19370201	19370213	13	CG17349_19370445	>blimp-1	0.82	-	# AAAGGGAAAGTG	0.316875313	0.997896845	3588538445
chr2L	6803944	6803956	13	CG17377_6802789	>blimp-1	0.8	-	# GCACCGAAAGTG	0.450375563	0.997896845	2713846132
chr2L	20644931	20644943	13	CG17470_20643244	>blimp-1	0.75	+	# GGTGTGAGAGTG	0.942814221	0.997896845	2022846121
chr2L	20644346	20644358	13	CG17470_20643244	>blimp-1	0.75	-	# GTAGTAAAATTC	0.942814221	0.997896845	441961529
chr2L	20633532	20633544	13	CG17472_20634515	>blimp-1	0.77	+	# GTATTAAAAGTT	0.83555333	0.997896845	3670692306
chr2L	4818691	4818703	13	CG3225_4818245	>blimp-1	0.77	-	# CTAGTGAAAATA	0.83555333	0.997896845	2309923029
chr2L	6918029	6918041	13	CG32829_6916445	>blimp-1	0.78	-	# CTCGGGAAAGTG	0.735302954	0.997896845	3455615342
chr2L	4792845	4792857	13	CG3294_4794549	>blimp-1	0.78	+	# GCAGTGAAAATT	0.735302954	0.997896845	2172461521
chr2L	14275991	14276003	13	CG32971_14277211	>blimp-1	0.89	-	# AAAGTGAAAGTG	0.030245368	0.997896845	2724384638
chr2L	14273470	14273482	13	CG32971_14274821	>blimp-1	0.76	-	# GTCGTAAAAGTT	0.904056084	0.997896845	2392230756
chr2L	8862232	8862244	13	CG32986_8862776	>blimp-1	0.79	+	# TCTGTGAAAGTG	0.572058087	0.997896845	2750615326
chr2L	8861640	8861652	13	CG32986_8862776	>blimp-1	0.81	-	# AAAGTGAAAGCG	0.374862293	0.997896845	25843846
chr2L	4400800	4400812	13	CG33003_4400953	>blimp-1	0.87	+	# GAAATGAAAGTG	0.067100651	0.997896845	360238465
chr2L	4399244	4399256	13	CG33003_4400953	>blimp-1	0.76	-	# GTAAAGAAATTG	0.904056084	0.997896845	2511692315
chr2L	14341567	14341579	13	CG33090_14342016	>blimp-1	0.76	+	# GAAGTGCAGGTG	0.904056084	0.997896845	2548923038
chr2L	14333577	14333589	13	CG33090_14334158	>blimp-1	0.79	-	# GAACTGAAAGTA	0.572058087	0.997896845	2601923113
chr2L	3321534	3321546	13	CG3326_3319872	>blimp-1	0.77	+	# GTAGCCAAAATG	0.83555333	0.997896845	2182384616
chr2L	9654748	9654760	13	CG33299_9656600	>blimp-1	0.76	+	# GTATTGTAAGTT	0.904056084	0.997896845	2710384619
chr2L	9655299	9655311	13	CG33299_9656600	>blimp-1	0.77	+	# GCAGTAAATGTG	0.83555333	0.997896845	2355999995
chr2L	9655594	9655606	13	CG33299_9656600	>blimp-1	0.78	+	# GGAGAGAAAGTA	0.735302954	0.997896845	2192076898
chr2L	13844856	13844868	13	CG33306_13843742	>blimp-1	0.77	+	# GACGTGAACGTG	0.83555333	0.997896845	274315388
chr2L	14809350	14809362	13	CG33309_14810761	>blimp-1	0.75	+	# GTAGTAAACGTA	0.942814221	0.997896845	3205000043
chr2L	14809338	14809350	13	CG33309_14810761	>blimp-1	0.75	-	# GTACTAAAATTG	0.942814221	0.997896845	3509307733
chr2L	2006957	2006969	13	CG33543_2006313	>blimp-1	0.76	-	# GTAGACAAACTG	0.904056084	0.997896845	2506230791
chr2L	4650752	4650764	13	CG3355_4651403	>blimp-1	0.76	-	# TTCATGAAAGTG	0.904056084	0.997896845	2884692256
chr2L	13528381	13528393	13	CG33641_13529042	>blimp-1	0.76	-	# GTAGTTAAAATT	0.904056084	0.997896845	2284384602
chr2L	13529490	13529502	13	CG33642_13529975	>blimp-1	0.78	-	# GTAGGTAAAGTT	0.735302954	0.997896845	2006153849
chr2L	13531503	13531515	13	CG33644_13532085	>blimp-1	0.75	-	# GTAGTTGAAGTT	0.942814221	0.997896845	2289307684
chr2L	5041794	5041806	13	CG33995_5043270	>blimp-1	0.78	+	# CTGGCGAAAGTG	0.735302954	0.997896845	2205153832
chr2L	5716648	5716660	13	CG34011_5716701	>blimp-1	0.77	+	# ATATTGAATGTG	0.83555333	0.997896845	2057384608
chr2L	10282083	10282095	13	CG34043_10280872	>blimp-1	0.75	-	# GTAGTGAACGCA	0.942814221	0.997896845	3693923015
chr2L	10282446	10282458	13	CG34043_10280872	>blimp-1	0.77	-	# GGAGTAAAAGCG	0.83555333	0.997896845	2279615361
chr2L	2266981	2266993	13	CG34049_2265321	>blimp-1	0.75	+	# GTAATTAAATTG	0.942814221	0.997896845	2977999953
chr2L	2266171	2266183	13	CG34049_2265321	>blimp-1	0.76	+	# GGTGTGAAACTG	0.904056084	0.997896845	2206153824
chr2L	17170046	17170058	13	CG34106_17171412	>blimp-1	0.76	-	# GTGCTTAAAGTG	0.904056084	0.997896845	3226000016
chr2L	4957173	4957185	13	CG34124_4958411	>blimp-1	0.76	+	# GCAGTGAGACTG	0.904056084	0.997896845	2145384643
chr2L	16135740	16135752	13	CG34168_16135272	>blimp-1	0.87	-	# GCAGTCAAAGTG	0.067100651	0.997896845	2105769235
chr2L	18376714	18376726	13	CG34171_18378591	>blimp-1	0.77	-	# GTAGATAAAGTC	0.83555333	0.997896845	2783461516
chr2L	2194610	2194622	13	CG34172_2193010	>blimp-1	0.76	+	# GTTTTGAAAGTT	0.904056084	0.997896845	3509000003
chr2L	2198120	2198132	13	CG34172_2197912	>blimp-1	0.77	+	# TTAGTGAAATTT	0.83555333	0.997896845	38563078
chr2L	2198160	2198172	13	CG34172_2197912	>blimp-1	0.79	-	# GAAATGAAAGTA	0.572058087	0.997896845	3227769322
chr2L	3396826	3396838	13	CG34175_3398023	>blimp-1	0.84	-	# GTAATGAAAGTT	0.236154231	0.997896845	341453853
chr2L	6059770	6059782	13	CG34180_6060510	>blimp-1	0.78	-	# TTAGAAAAAGTG	0.735302954	0.997896845	2541153816
chr2L	9366901	9366913	13	CG34181_9367640	>blimp-1	0.88	-	# TAAGTGAAAGTG	0.041161743	0.997896845	2412461489
chr2L	6662994	6663006	13	CG34310_6663664	>blimp-1	0.75	+	# GTGATAAAAGTG	0.942814221	0.997896845	2260230768
chr2L	6672359	6672371	13	CG34310_6673964	>blimp-1	0.75	+	# GTAGTAGAAGTA	0.942814221	0.997896845	3170538409
chr2L	6672191	6672203	13	CG34310_6673964	>blimp-1	0.87	-	# GAGGTGAAAGTG	0.067100651	0.997896845	2647615368
chr2L	6672185	6672197	13	CG34310_6673964	>blimp-1	0.8	-	# AAAGTGAAGGTG	0.450375563	0.997896845	3351538421
chr2L	3662170	3662182	13	CG34340_3662745	>blimp-1	0.82	-	# GTGGTGAATGTG	0.316875313	0.997896845	2131076914
chr2L	6621587	6621599	13	CG34345_6623112	>blimp-1	0.95	-	# GCAGTGAAAGTG	0.004206309	0.997896845	2067846149
chr2L	10355181	10355193	13	CG34367_10353905	>blimp-1	0.83	+	# GTAGTTAATGTG	0.276815223	0.997896845	2472846194
chr2L	3202124	3202136	13	CG34393_3200496	>blimp-1	0.75	+	# GTATTTGAAGTG	0.942814221	0.997896845	2386923061
chr2L	3374950	3374962	13	CG34394_3373372	>blimp-1	0.81	-	# GTAGTGCATGTG	0.374862293	0.997896845	3412230826
chr2L	8897618	8897630	13	CG34398_8898786	>blimp-1	0.77	+	# GTAGCGAAAGCC	0.83555333	0.997896845	2642153841
chr2L	2420819	2420831	13	CG34447_2420013	>blimp-1	0.75	-	# GTTTTGAAAATG	0.942814221	0.997896845	2368692314
chr2L	2518446	2518458	13	CG3528_2518037	>blimp-1	0.77	+	# GAAGTGTAATTG	0.83555333	0.997896845	2763153849
chr2L	3022142	3022154	13	CG3542_3023226	>blimp-1	0.75	+	# GTGCTGAAAGTC	0.942814221	0.997896845	2243000021
chr2L	3021899	3021911	13	CG3542_3023226	>blimp-1	0.81	-	# GTAGTGCATGTG	0.374862293	0.997896845	2698461572
chr2L	2990916	2990928	13	CG3558_2992870	>blimp-1	0.81	-	# GAAGCGAAAGTA	0.374862293	0.997896845	2422692298
chr2L	3699010	3699022	13	CG3604_3697812	>blimp-1	0.78	-	# GCAGAGAAACTG	0.735302954	0.997896845	2066923093
chr2L	255768	255780	13	CG3645_254750	>blimp-1	0.77	-	# GTAATTAAAGTT	0.83555333	0.997896845	3216307704
chr2L	156292	156304	13	CG3709_155305	>blimp-1	0.77	-	# GTAGCAAAAATG	0.83555333	0.997896845	2576846138
chr2L	4198427	4198439	13	CG3714_4198071	>blimp-1	0.76	+	# GTAGTGAAATGT	0.904056084	0.997896845	2315615378
chr2L	4197804	4197816	13	CG3714_4197380	>blimp-1	0.89	+	# AAAGTGAAAGTG	0.030245368	0.997896845	2237615365
chr2L	9433739	9433751	13	CG3769_9435399	>blimp-1	0.76	+	# GCAGTGAATCTG	0.904056084	0.997896845	2186923099
chr2L	4976572	4976584	13	CG3792_4977312	>blimp-1	0.75	+	# GTGTTGAAGGTG	0.942814221	0.997896845	339176929
chr2L	9567092	9567104	13	CG3838_9568890	>blimp-1	0.78	+	# ATCGTTAAAGTG	0.735302954	0.997896845	264553847
chr2L	3860840	3860852	13	CG3964_3862668	>blimp-1	0.78	+	# CTAGTGAAAGGA	0.735302954	0.997896845	2292692299
chr2L	453603	453615	13	CG4133_455531	>blimp-1	0.79	-	# GAAGTGAAAGCC	0.572058087	0.997896845	2975230842
chr2L	20970027	20970039	13	CG42238_20968967	>blimp-1	0.79	+	# CTAGCCAAAGTG	0.572058087	0.997896845	2223230756
chr2L	14973790	14973802	13	CG42313_14972300	>blimp-1	0.78	+	# GAAATGAAAATG	0.735302954	0.997896845	2991538442
chr2L	9924442	9924454	13	CG42366_9925161	>blimp-1	0.77	+	# GTAGTTAAAGCT	0.83555333	0.997896845	3409461501
chr2L	2022460	2022472	13	CG4238_2024012	>blimp-1	0.76	+	# GTTGCCAAAGTG	0.904056084	0.997896845	2435153842
chr2L	2016404	2016416	13	CG4238_2017540	>blimp-1	0.79	-	# GAAGAGAAATTG	0.572058087	0.997896845	2498461501
chr2L	2015551	2015563	13	CG4238_2017540	>blimp-1	0.92	-	# GTAATGAAAGTG	0.014922384	0.997896845	3099153785
chr2L	16601678	16601690	13	CG42389_16601827	>blimp-1	0.75	+	# GTAGTAAATGTA	0.942814221	0.997896845	2167692322
chr2L	16655534	16655546	13	CG42389_16657097	>blimp-1	0.87	+	# GAAATGAAAGTG	0.067100651	0.997896845	3076923049
chr2L	2131113	2131125	13	CG4259_2129237	>blimp-1	0.81	+	# GTAGTGCAGGTG	0.374862293	0.997896845	3617846117
chr2L	8146165	8146177	13	CG42763_8145107	>blimp-1	0.77	-	# TTATTGAAAGGG	0.83555333	0.997896845	2351692314
chr2L	15867099	15867111	13	CG42792_15865429	>blimp-1	0.76	-	# ATTGTGAATGTG	0.904056084	0.997896845	2088384603
chr2L	9425872	9425884	13	CG42847_9427870	>blimp-1	0.76	+	# GTCTTCAAAGTG	0.904056084	0.997896845	3304307711
chr2L	14350597	14350609	13	CG43052_14352077	>blimp-1	0.78	+	# ATATTGAAATTG	0.735302954	0.997896845	2216153864
chr2L	4409334	4409346	13	CG43055_4411155	>blimp-1	0.84	+	# GTCGTGAAAGTT	0.236154231	0.997896845	3630076867
chr2L	4410397	4410409	13	CG43055_4411155	>blimp-1	0.75	+	# GTATTGACAGTC	0.942814221	0.997896845	3314538506
chr2L	8244408	8244420	13	CG43057_8244003	>blimp-1	0.75	-	# GTAGTCAAACTC	0.942814221	0.997896845	2051076922
chr2L	10849149	10849161	13	CG43129_10850141	>blimp-1	0.78	-	# TTAGCCAAAGTG	0.735302954	0.997896845	255284618
chr2L	11655783	11655795	13	CG43167_11657410	>blimp-1	0.75	+	# GTAATAAAATTG	0.942814221	0.997896845	3128461563
chr2L	11656710	11656722	13	CG43167_11657410	>blimp-1	0.92	+	# GTAGTGAAAGTC	0.014922384	0.997896845	3134153815
chr2L	6931792	6931804	13	CG43232_6932121	>blimp-1	0.75	+	# GTACTCAAAATG	0.942814221	0.997896845	2747384566
chr2L	7691905	7691917	13	CG43235_7693030	>blimp-1	0.75	-	# ATAGTGCCAGTG	0.942814221	0.997896845	2487538472
chr2L	14181862	14181874	13	CG43333_14180686	>blimp-1	0.76	+	# GTCCGGAAAGTG	0.904056084	0.997896845	2134076937
chr2L	14180857	14180869	13	CG43333_14180686	>blimp-1	0.82	-	# AAAGAGAAAGTG	0.316875313	0.997896845	3724769166
chr2L	11483777	11483789	13	CG43355_11484820	>blimp-1	0.78	-	# GAAATGAAATTG	0.735302954	0.997896845	2696076927
chr2L	13772178	13772190	13	CG43376_13773997	>blimp-1	0.76	-	# ATAGTGAGAATG	0.904056084	0.997896845	3388461543
chr2L	2620169	2620181	13	CG43403_2620187	>blimp-1	0.8	-	# CAAGTGAAATTG	0.450375563	0.997896845	3094461533
chr2L	11535542	11535554	13	CG43438_11536145	>blimp-1	0.76	-	# GTAATAAAAGCG	0.904056084	0.997896845	3558230849
chr2L	3764410	3764422	13	CG43703_3765494	>blimp-1	0.76	+	# GCAGTGGCAGTG	0.904056084	0.997896845	2165846166
chr2L	3764790	3764802	13	CG43703_3765494	>blimp-1	0.76	-	# ATGGTGACAGTG	0.904056084	0.997896845	2652692269
chr2L	3759806	3759818	13	CG43707_3759978	>blimp-1	0.78	+	# GTATGTAAAGTG	0.735302954	0.997896845	385369233
chr2L	11073790	11073802	13	CG43725_11075513	>blimp-1	0.78	+	# GCGGTTAAAGTG	0.735302954	0.997896845	2444692295
chr2L	11075317	11075329	13	CG43725_11075513	>blimp-1	0.78	+	# GCAGAGGAAGTG	0.735302954	0.997896845	22932308
chr2L	11075323	11075335	13	CG43725_11075513	>blimp-1	0.77	+	# GAAGTGGAAATG	0.83555333	0.997896845	3091307762
chr2L	13308172	13308184	13	CG43779_13306755	>blimp-1	0.75	-	# GTGCTCAAAGTG	0.942814221	0.997896845	2699461568
chr2L	3999021	3999033	13	CG43797_4000018	>blimp-1	0.78	+	# GCAATGAAAATG	0.735302954	0.997896845	3079153859
chr2L	18805532	18805544	13	CG43814_18805347	>blimp-1	0.82	-	# AAAGTGAAAGTA	0.316875313	0.997896845	2385384656
chr2L	3575591	3575603	13	CG43815_3576210	>blimp-1	0.75	-	# GTTGTGAAATTT	0.942814221	0.997896845	3740230744
chr2L	3574472	3574484	13	CG43815_3576210	>blimp-1	0.76	-	# ATCGTGCAAGTG	0.904056084	0.997896845	3016076936
chr2L	13418675	13418687	13	CG43850_13419221	>blimp-1	0.75	+	# TTAATGAGAGTG	0.942814221	0.997896845	2889538458
chr2L	15677877	15677889	13	CG43923_15676102	>blimp-1	0.77	+	# TTATTGAAATTG	0.83555333	0.997896845	3428153909
chr2L	15676354	15676366	13	CG43923_15676102	>blimp-1	0.89	+	# ACAGTGAAAGTG	0.030245368	0.997896845	2947769174
chr2L	15712874	15712886	13	CG43924_15711099	>blimp-1	0.77	+	# TTATTGAAATTG	0.83555333	0.997896845	3671923124
chr2L	15711351	15711363	13	CG43924_15711099	>blimp-1	0.89	+	# ACAGTGAAAGTG	0.030245368	0.997896845	2947769174
chr2L	2423914	2423926	13	CG44139_2424797	>blimp-1	0.76	+	# GGAGTACAAGTG	0.904056084	0.997896845	282823084
chr2L	9398905	9398917	13	CG4438_9397988	>blimp-1	0.8	-	# AAAGTGGAAGTG	0.450375563	0.997896845	2928076955
chr2L	15885136	15885148	13	CG44475_15883190	>blimp-1	0.82	-	# AAATTGAAAGTG	0.316875313	0.997896845	2765999987
chr2L	7180824	7180836	13	CG4495_7182234	>blimp-1	0.78	+	# GCAGAGGAAGTG	0.735302954	0.997896845	2369461582
chr2L	11832717	11832729	13	CG45011_11834086	>blimp-1	0.78	-	# GAAGAGTAAGTG	0.735302954	0.997896845	4055769316
chr2L	7205022	7205034	13	CG4502_7204264	>blimp-1	0.78	+	# TTATTCAAAGTG	0.735302954	0.997896845	2678923052
chr2L	1127888	1127900	13	CG4552_1129316	>blimp-1	0.77	+	# TTAATAAAAGTG	0.83555333	0.997896845	3229769299
chr2L	16486418	16486430	13	CG4580_16488148	>blimp-1	0.78	-	# GAAATGAAATTG	0.735302954	0.997896845	3066307664
chr2L	9919095	9919107	13	CG4594_9920160	>blimp-1	0.78	-	# GAAGTCAAAATG	0.735302954	0.997896845	3395692303
chr2L	9916645	9916657	13	CG4598_9918618	>blimp-1	0.76	+	# GCAGTGATCGTG	0.904056084	0.997896845	2342153813
chr2L	9918098	9918110	13	CG4598_9918618	>blimp-1	0.85	+	# GTAGAGAAAGTA	0.170255383	0.997896845	2783692287
chr2L	7755882	7755894	13	CG46025_7756222	>blimp-1	0.75	+	# GTAATGAAAAGG	0.942814221	0.997896845	200530768
chr2L	9938561	9938573	13	CG4619_9938863	>blimp-1	0.78	-	# GCCGGGAAAGTG	0.735302954	0.997896845	2301615365
chr2L	14764536	14764548	13	CG4701_14765908	>blimp-1	0.78	+	# GCACTGAAATTG	0.735302954	0.997896845	2352615361
chr2L	9953221	9953233	13	CG4709_9954454	>blimp-1	0.75	-	# GTGGCGGAAGTG	0.942814221	0.997896845	222284615
chr2L	121625	121637	13	CG4822_120742	>blimp-1	0.75	+	# GTGGAGTAAGTG	0.942814221	0.997896845	2889538435
chr2L	10221510	10221522	13	CG4908_10222657	>blimp-1	0.76	-	# GTTGCGAAACTG	0.904056084	0.997896845	3060615408
chr2L	10264769	10264781	13	CG4953_10266703	>blimp-1	0.79	+	# GCAGACAAAGTG	0.572058087	0.997896845	2751230775
chr2L	10266406	10266418	13	CG4953_10266703	>blimp-1	0.83	-	# GTAGTAAAAATG	0.276815223	0.997896845	3677615386
chr2L	11516184	11516196	13	CG4970_11517391	>blimp-1	0.78	-	# ATTGTGAAAGTT	0.735302954	0.997896845	2004307701
chr2L	10313968	10313980	13	CG4972_10314792	>blimp-1	0.79	-	# GCAAGGAAAGTG	0.572058087	0.997896845	2956615333
chr2L	1184602	1184614	13	CG5001_1186254	>blimp-1	0.75	-	# GTTGTCAAAGGG	0.942814221	0.997896845	2466615358
chr2L	17451927	17451939	13	CG5050_17452924	>blimp-1	0.76	+	# GTATTGAAATTC	0.904056084	0.997896845	2025615383
chr2L	10380631	10380643	13	CG5096_10382263	>blimp-1	0.86	-	# ATACTGAAAGTG	0.119479219	0.997896845	3660999915
chr2L	17480222	17480234	13	CG5110_17481231	>blimp-1	0.76	+	# GTATTGAAATTC	0.904056084	0.997896845	3033230748
chr2L	13129144	13129156	13	CG5122_13130591	>blimp-1	0.77	+	# GTACGCAAAGTG	0.83555333	0.997896845	305815384
chr2L	7402380	7402392	13	CG5171_7402856	>blimp-1	0.76	-	# GCAGTGGAATTG	0.904056084	0.997896845	204261541
chr2L	7400741	7400753	13	CG5171_7401335	>blimp-1	0.8	-	# GAATTCAAAGTG	0.450375563	0.997896845	2953769154
chr2L	10324218	10324230	13	CG5381_10323102	>blimp-1	0.77	+	# GCAGTGAATGGG	0.83555333	0.997896845	2105846149
chr2L	10307478	10307490	13	CG5390_10306594	>blimp-1	0.76	+	# TTCGTGAAAGTC	0.904056084	0.997896845	3273999988
chr2L	10308188	10308200	13	CG5390_10306594	>blimp-1	0.76	-	# ATTGTGATAGTG	0.904056084	0.997896845	2398538479
chr2L	10308202	10308214	13	CG5390_10306594	>blimp-1	0.77	-	# ATAATGAAATTG	0.83555333	0.997896845	3253230806
chr2L	1332365	1332377	13	CG5440_1334128	>blimp-1	0.78	+	# ATATTGAAATTG	0.735302954	0.997896845	4019923082
chr2L	12693094	12693106	13	CG5525_12692934	>blimp-1	0.76	+	# ATCGTGAGAGTG	0.904056084	0.997896845	2263384606
chr2L	1355282	1355294	13	CG5561_1354109	>blimp-1	0.75	-	# GTGGTGAAAGGC	0.942814221	0.997896845	2104153867
chr2L	1355378	1355390	13	CG5561_1354109	>blimp-1	0.75	-	# TTCGTGCAAGTG	0.942814221	0.997896845	2221769247
chr2L	17984799	17984811	13	CG5681_17986399	>blimp-1	0.78	+	# GCATTGAAATTG	0.735302954	0.997896845	298523079
chr2L	17985538	17985550	13	CG5681_17986399	>blimp-1	0.77	+	# TTTGCGAAAGTG	0.83555333	0.997896845	3082846217
chr2L	10208580	10208592	13	CG5734_10206961	>blimp-1	0.75	+	# GTAATTACAGTG	0.942814221	0.997896845	2343384662
chr2L	10207598	10207610	13	CG5734_10206961	>blimp-1	0.78	-	# GGAGTAAAAGTT	0.735302954	0.997896845	335107694
chr2L	18118624	18118636	13	CG5758_18119995	>blimp-1	0.79	+	# GCATTTAAAGTG	0.572058087	0.997896845	2724384601
chr2L	18120079	18120091	13	CG5758_18120130	>blimp-1	0.77	+	# TTAGTGAAACTA	0.83555333	0.997896845	2000307683
chr2L	12706074	12706086	13	CG5776_12704451	>blimp-1	0.78	+	# GCTATGAAAGTG	0.735302954	0.997896845	2462846162
chr2L	12698416	12698428	13	CG5781_12697323	>blimp-1	0.84	+	# GTACTGAAAGTC	0.236154231	0.997896845	329346155
chr2L	9958378	9958390	13	CG5846_9957019	>blimp-1	0.76	+	# GTTGACAAAGTG	0.904056084	0.997896845	2305153868
chr2L	16309035	16309047	13	CG5861_16307298	>blimp-1	0.78	+	# GGATTGAAAGTA	0.735302954	0.997896845	364699997
chr2L	16449238	16449250	13	CG5888_16448469	>blimp-1	0.75	+	# GTAGACCAAGTG	0.942814221	0.997896845	2905230694
chr2L	16407016	16407028	13	CG5888_16405957	>blimp-1	0.83	+	# GTAATGAAACTG	0.276815223	0.997896845	3590000079
chr2L	16520232	16520244	13	CG5953_16520177	>blimp-1	0.76	-	# GTAGTAAAAATT	0.904056084	0.997896845	2915461531
chr2L	16533760	16533772	13	CG5953_16532877	>blimp-1	0.75	-	# GTAGTAAAATTC	0.942814221	0.997896845	2078769216
chr2L	11121478	11121490	13	CG6230_11120319	>blimp-1	0.77	+	# GTACTTAAAGTT	0.83555333	0.997896845	2705230841
chr2L	17013497	17013509	13	CG6304_17013134	>blimp-1	0.78	+	# GAGGTGAAATTG	0.735302954	0.997896845	3488615403
chr2L	17501892	17501904	13	CG6412_17501106	>blimp-1	0.76	+	# GTCGGGAAAGGG	0.904056084	0.997896845	2216307719
chr2L	10702195	10702207	13	CG6415_10703621	>blimp-1	0.81	+	# AAAGTAAAAGTG	0.374862293	0.997896845	3484307601
chr2L	10702406	10702418	13	CG6415_10703621	>blimp-1	0.75	+	# GTAGGGCAAGCG	0.942814221	0.997896845	2099692345
chr2L	10702490	10702502	13	CG6415_10703621	>blimp-1	0.78	+	# GAAGTCCAAGTG	0.735302954	0.997896845	2633615439
chr2L	10702784	10702796	13	CG6415_10703621	>blimp-1	0.76	+	# GTAGTTAAAGGC	0.904056084	0.997896845	2062307682
chr2L	10724316	10724328	13	CG6431_10725515	>blimp-1	0.78	-	# TTAGGGAAAGTA	0.735302954	0.997896845	2317076986
chr2L	11499677	11499689	13	CG6488_11498948	>blimp-1	0.89	+	# CAAGTGAAAGTG	0.030245368	0.997896845	2032230813
chr2L	10817162	10817174	13	CG6508_10819107	>blimp-1	0.76	-	# GTAACGAAATTG	0.904056084	0.997896845	2246076893
chr2L	13372498	13372510	13	CG6565_13374177	>blimp-1	0.77	+	# GACGTGAACGTG	0.83555333	0.997896845	203507689
chr2L	10770981	10770993	13	CG6724_10769952	>blimp-1	0.81	-	# AAAATGAAAGTG	0.374862293	0.997896845	361338461
chr2L	10771430	10771442	13	CG6724_10769952	>blimp-1	0.83	-	# AAAGCGAAAGTG	0.276815223	0.997896845	283015388
chr2L	10744864	10744876	13	CG6729_10743935	>blimp-1	0.78	+	# GTATGTAAAGTG	0.735302954	0.997896845	2165538471
chr2L	10744824	10744836	13	CG6729_10743935	>blimp-1	0.76	-	# GCAGTGAACCTG	0.904056084	0.997896845	3177692267
chr2L	12043409	12043421	13	CG6785_12043109	>blimp-1	0.86	-	# GCGGTGAAAGTG	0.119479219	0.997896845	2661769239
chr2L	5522810	5522822	13	CG6907_5524298	>blimp-1	0.77	+	# ATTGTGAAAATG	0.83555333	0.997896845	335561544
chr2L	7819970	7819982	13	CG7115_7821151	>blimp-1	0.75	+	# GTTGAGAAATTG	0.942814221	0.997896845	2073384633
chr2L	7780418	7780430	13	CG7164_7781465	>blimp-1	0.79	+	# GCATTGAAAGTC	0.572058087	0.997896845	2007538447
chr2L	7745071	7745083	13	CG7214_7744839	>blimp-1	0.78	+	# GCAGTGAAAGGC	0.735302954	0.997896845	2769384572
chr2L	5710094	5710106	13	CG7236_5711903	>blimp-1	0.78	+	# GCAATGAAAATG	0.735302954	0.997896845	2921307752
chr2L	5708142	5708154	13	CG7236_5708391	>blimp-1	0.78	-	# GAAGTGAGAGTT	0.735302954	0.997896845	2179692287
chr2L	5708619	5708631	13	CG7236_5709950	>blimp-1	0.85	+	# GGAATGAAAGTG	0.170255383	0.997896845	2155769231
chr2L	1869066	1869078	13	CG7295_1869803	>blimp-1	0.78	-	# GAATTGTAAGTG	0.735302954	0.997896845	328630772
chr2L	1868316	1868328	13	CG7295_1869803	>blimp-1	0.78	-	# TTATTAAAAGTG	0.735302954	0.997896845	2319076914
chr2L	1925861	1925873	13	CG7337_1927753	>blimp-1	0.75	-	# GTAATTAAAATG	0.942814221	0.997896845	2513769229
chr2L	8041621	8041633	13	CG7367_8039788	>blimp-1	0.76	-	# ATGGTGCAAGTG	0.904056084	0.997896845	269546156
chr2L	10511333	10511345	13	CG7384_10510453	>blimp-1	0.77	-	# GAAGTGTAAATG	0.83555333	0.997896845	2237615361
chr2L	8308089	8308101	13	CG7818_8308427	>blimp-1	0.82	-	# GTAGTGAGATTG	0.316875313	0.997896845	2485307687
chr2L	8306764	8306776	13	CG7818_8308427	>blimp-1	0.75	-	# GTAGTTAAAATC	0.942814221	0.997896845	3044076932
chr2L	8303687	8303699	13	CG7840_8305586	>blimp-1	0.84	-	# GTAGCGAAATTG	0.236154231	0.997896845	3014615366
chr2L	13847274	13847286	13	CG7953_13847925	>blimp-1	0.78	-	# GAAGTTGAAGTG	0.735302954	0.997896845	2150153854
chr2L	8215214	8215226	13	CG8349_8215915	>blimp-1	0.76	-	# TTATTGCAAGTG	0.904056084	0.997896845	2387461532
chr2L	8212497	8212509	13	CG8353_8214305	>blimp-1	0.77	+	# GAAGTGCAAATG	0.83555333	0.997896845	2254076917
chr2L	8212571	8212583	13	CG8353_8214305	>blimp-1	0.75	+	# GTAGGGGAAGCG	0.942814221	0.997896845	2454615403
chr2L	8156749	8156761	13	CG8552_8156750	>blimp-1	0.75	+	# GTTGTGAAAGAA	0.942814221	0.997896845	2353307672
chr2L	8160478	8160490	13	CG8552_8159638	>blimp-1	0.78	+	# GGACTGAAAGTA	0.735302954	0.997896845	2615923061
chr2L	8123125	8123137	13	CG8673_8124329	>blimp-1	0.87	-	# GAAGTCAAAGTG	0.067100651	0.997896845	3586384594
chr2L	21220346	21220358	13	CG8677_21221312	>blimp-1	0.88	-	# CCAGTGAAAGTG	0.041161743	0.997896845	238069232
chr2L	2867965	2867977	13	CG8813_2869652	>blimp-1	0.75	+	# GTAGAATAAGTG	0.942814221	0.997896845	2297307656
chr2L	3409166	3409178	13	CG8840_3410560	>blimp-1	0.84	-	# GTATTGAAAGCG	0.236154231	0.997896845	2318153828
chr2L	3518174	3518186	13	CG8851_3519677	>blimp-1	0.76	-	# GGAGTTCAAGTG	0.904056084	0.997896845	3086769237
chr2L	13723805	13723817	13	CG9014_13723642	>blimp-1	0.79	+	# GAATTGAAATTG	0.572058087	0.997896845	2371384644
chr2L	6012088	6012100	13	CG9098_6011233	>blimp-1	0.78	-	# GTACCGAAAGTT	0.735302954	0.997896845	2155153884
chr2L	6025671	6025683	13	CG9107_6024539	>blimp-1	0.75	-	# GTAATTAGAGTG	0.942814221	0.997896845	2349538442
chr2L	6064429	6064441	13	CG9140_6062757	>blimp-1	0.75	-	# GGCGTGAAGGTG	0.942814221	0.997896845	2690615383
chr2L	6064587	6064599	13	CG9140_6062757	>blimp-1	0.75	-	# GTAGTGAATGGT	0.942814221	0.997896845	2195461595
chr2L	5774121	5774133	13	CG9171_5772516	>blimp-1	0.75	+	# GTCATGAAAGTC	0.942814221	0.997896845	2997230777
chr2L	6130476	6130488	13	CG9222_6131023	>blimp-1	0.82	-	# GTACTGCAAGTG	0.316875313	0.997896845	2452615419
chr2L	6130239	6130251	13	CG9222_6131023	>blimp-1	0.84	-	# CTAGTGGAAGTG	0.236154231	0.997896845	2052307694
chr2L	21162029	21162041	13	CG9246_21163641	>blimp-1	0.75	+	# GTAATGCAAGTA	0.942814221	0.997896845	2130846181
chr2L	21157036	21157048	13	CG9248_21158904	>blimp-1	0.82	+	# AAAGTTAAAGTG	0.316875313	0.997896845	2649923061
chr2L	21157936	21157948	13	CG9248_21158904	>blimp-1	0.77	-	# GCGGTGATAGTG	0.83555333	0.997896845	21617692
chr2L	13597787	13597799	13	CG9254_13597186	>blimp-1	0.79	+	# GAATTGAAAATG	0.572058087	0.997896845	2488076953
chr2L	21100835	21100847	13	CG9257_21102743	>blimp-1	0.75	+	# GTAGATAATGTG	0.942814221	0.997896845	2473461544
chr2L	21101352	21101364	13	CG9257_21102743	>blimp-1	0.79	+	# CCAGTGAAAGAG	0.572058087	0.997896845	2365076928
chr2L	13380446	13380458	13	CG9302_13378538	>blimp-1	0.76	+	# GTTGCGAAAGAG	0.904056084	0.997896845	2689692342
chr2L	8704400	8704412	13	CG9314_8705572	>blimp-1	0.75	-	# TTAATGAAGGTG	0.942814221	0.997896845	227053841
chr2L	20731248	20731260	13	CG9317_20730282	>blimp-1	0.81	-	# CAAGTGAAAGTA	0.374862293	0.997896845	4124307724
chr2L	20795901	20795913	13	CG9328_20797715	>blimp-1	0.77	+	# GTATGGAAAATG	0.83555333	0.997896845	2131461549
chr2L	4251361	4251373	13	CR44059_4249676	>blimp-1	0.87	+	# ATAGCGAAAGTG	0.067100651	0.997896845	2378384615
chr2L	2188789	2188801	13	CR44065_2190191	>blimp-1	0.77	+	# TGAGTGGAAGTG	0.83555333	0.997896845	2370615372
chr2L	13283483	13283495	13	CR44083_13284927	>blimp-1	0.75	+	# GTAGTTTAAGTA	0.942814221	0.997896845	3303538426
chr2L	13283674	13283686	13	CR44083_13284927	>blimp-1	0.79	+	# ATAGCGAAAGCG	0.572058087	0.997896845	2570692281
chr2L	2535312	2535324	13	CR44112_2533569	>blimp-1	0.76	+	# TTAGTGACAGTT	0.904056084	0.997896845	2135846129
chr2L	8201412	8201424	13	CR44119_8201557	>blimp-1	0.77	+	# GAAGTGCAAATG	0.83555333	0.997896845	2286769241
chr2L	8201308	8201320	13	CR44119_8201557	>blimp-1	0.78	-	# GAATTGCAAGTG	0.735302954	0.997896845	2283461539
chr2L	8199781	8199793	13	CR44119_8201557	>blimp-1	0.77	-	# GGTGGGAAAGTG	0.83555333	0.997896845	2457307655
chr2L	11744630	11744642	13	CR44144_11744422	>blimp-1	0.76	-	# GTTGCGAAATTG	0.904056084	0.997896845	2107384629
chr2L	9570300	9570312	13	CR44149_9568785	>blimp-1	0.83	-	# GTGCTGAAAGTG	0.276815223	0.997896845	2753307691
chr2L	11282289	11282301	13	CR44182_11280577	>blimp-1	0.77	+	# GCCGTGAAACTG	0.83555333	0.997896845	2828076975
chr2L	11281472	11281484	13	CR44182_11280577	>blimp-1	0.77	+	# GTAACCAAAGTG	0.83555333	0.997896845	372746156
chr2L	19217082	19217094	13	CR44189_19217407	>blimp-1	0.75	+	# TTAGTGACAATG	0.942814221	0.997896845	317138461
chr2L	19273397	19273409	13	CR44190_19272861	>blimp-1	0.77	-	# GGCGTCAAAGTG	0.83555333	0.997896845	2649076902
chr2L	13088181	13088193	13	CR44197_13089803	>blimp-1	0.76	+	# CTTGTGAAAATG	0.904056084	0.997896845	2889384606
chr2L	21957465	21957477	13	CR44217_21957820	>blimp-1	0.75	+	# GTTATTAAAGTG	0.942814221	0.997896845	2792692299
chr2L	247086	247098	13	CR44218_248909	>blimp-1	0.77	+	# GTATAGAAAGAG	0.83555333	0.997896845	3441615462
chr2L	248536	248548	13	CR44218_248909	>blimp-1	0.91	-	# GTCGTGAAAGTG	0.02203305	0.997896845	2071461581
chr2L	222217	222229	13	CR44222_223519	>blimp-1	0.76	-	# TTATTGCAAGTG	0.904056084	0.997896845	2233076921
chr2L	3537372	3537384	13	CR44308_3537844	>blimp-1	0.77	-	# ATAATGAAACTG	0.83555333	0.997896845	3378153874
chr2L	3536307	3536319	13	CR44308_3537844	>blimp-1	0.85	-	# GTAGGCAAAGTG	0.170255383	0.997896845	28119231
chr2L	3560078	3560090	13	CR44309_3562038	>blimp-1	0.78	-	# ATCGTTAAAGTG	0.735302954	0.997896845	3081923072
chr2L	6984497	6984509	13	CR44326_6985961	>blimp-1	0.79	-	# CAAGTGCAAGTG	0.572058087	0.997896845	4068000064
chr2L	9032275	9032287	13	CR44352_9031836	>blimp-1	0.77	-	# GTCTTGAAAGTT	0.83555333	0.997896845	2384076893
chr2L	16951246	16951258	13	CR44393_16950070	>blimp-1	0.77	+	# ATAATGAAAATG	0.83555333	0.997896845	3061076916
chr2L	18402234	18402246	13	CR44487_18403948	>blimp-1	0.75	+	# AAAGCAAAAGTG	0.942814221	0.997896845	2621153901
chr2L	18315346	18315358	13	CR44489_18314051	>blimp-1	0.81	-	# ACACTGAAAGTG	0.374862293	0.997896845	2188923077
chr2L	11560244	11560256	13	CR44495_11561201	>blimp-1	0.79	+	# GAAATGAAAGTA	0.572058087	0.997896845	337792306
chr2L	11560841	11560853	13	CR44495_11561201	>blimp-1	0.76	-	# GTAATAAAAGGG	0.904056084	0.997896845	2011384634
chr2L	11560156	11560168	13	CR44495_11561201	>blimp-1	0.8	-	# GAAATGAAAGTT	0.450375563	0.997896845	3458461578
chr2L	5888995	5889007	13	CR44577_5887989	>blimp-1	0.8	+	# AGATTGAAAGTG	0.450375563	0.997896845	2559999949
chr2L	5888969	5888981	13	CR44577_5887989	>blimp-1	0.78	+	# CGAGTGAAAATG	0.735302954	0.997896845	2773307635
chr2L	5888943	5888955	13	CR44577_5887989	>blimp-1	0.78	-	# CTAATCAAAGTG	0.735302954	0.997896845	2756384556
chr2L	10787199	10787211	13	CR44582_10786173	>blimp-1	0.78	+	# CTCGCGAAAGTG	0.735302954	0.997896845	2553999983
chr2L	11333861	11333873	13	CR44584_11332736	>blimp-1	0.85	-	# ATAGTGCAAGTG	0.170255383	0.997896845	2899461499
chr2L	11353540	11353552	13	CR44586_11354001	>blimp-1	0.81	+	# AAAGTGAAACTG	0.374862293	0.997896845	3784923049
chr2L	12083730	12083742	13	CR44590_12082074	>blimp-1	0.78	+	# GCCCTGAAAGTG	0.735302954	0.997896845	2098999979
chr2L	12084545	12084557	13	CR44592_12085649	>blimp-1	0.8	-	# ACTGTGAAAGTG	0.450375563	0.997896845	317853851
chr2L	12571329	12571341	13	CR44598_12571157	>blimp-1	0.79	-	# ATATTCAAAGTG	0.572058087	0.997896845	3905769238
chr2L	13401769	13401781	13	CR44600_13399831	>blimp-1	0.76	+	# TTAATGAAAATG	0.904056084	0.997896845	2095307694
chr2L	15810804	15810816	13	CR44602_15810319	>blimp-1	0.78	-	# GAAGTGAAACAG	0.735302954	0.997896845	2311615381
chr2L	1626868	1626880	13	CR44603_1626021	>blimp-1	0.92	-	# GTAGTGAAAGTA	0.014922384	0.997896845	3245846134
chr2L	1624593	1624605	13	CR44603_1623478	>blimp-1	0.78	+	# ATATTGAAAATG	0.735302954	0.997896845	3675461512
chr2L	18001464	18001476	13	CR44604_18002847	>blimp-1	0.81	+	# ACAGTAAAAGTG	0.374862293	0.997896845	2295538437
chr2L	18001508	18001520	13	CR44604_18002847	>blimp-1	0.75	-	# GTAATTAAAGAG	0.942814221	0.997896845	2561384634
chr2L	20948488	20948500	13	CR44606_20948170	>blimp-1	0.77	+	# GTACACAAAGTG	0.83555333	0.997896845	3082923091
chr2L	2509146	2509158	13	CR44607_2507596	>blimp-1	0.75	+	# GTAGGACAAGTG	0.942814221	0.997896845	3369846161
chr2L	15126867	15126879	13	CR44706_15128559	>blimp-1	0.75	+	# GTTGAGAAAGCG	0.942814221	0.997896845	2072692317
chr2L	14275082	14275094	13	CR44729_14274454	>blimp-1	0.78	+	# ATAGTGAAAATA	0.735302954	0.997896845	256592307
chr2L	14484213	14484225	13	CR44731_14486040	>blimp-1	0.79	+	# GCGTTGAAAGTG	0.572058087	0.997896845	3127999966
chr2L	14408457	14408469	13	CR44733_14409755	>blimp-1	0.78	-	# GCCGTCAAAGTG	0.735302954	0.997896845	3025692302
chr2L	18904234	18904246	13	CR44738_18906124	>blimp-1	0.77	+	# ATAATGAAAATG	0.83555333	0.997896845	4056307683
chr2L	18905619	18905631	13	CR44738_18906124	>blimp-1	0.78	-	# GCAATGAAAGCG	0.735302954	0.997896845	3266923107
chr2L	18904972	18904984	13	CR44738_18906124	>blimp-1	0.75	-	# GTGTTGAAAATG	0.942814221	0.997896845	3628846169
chr2L	5289290	5289302	13	CR44743_5288667	>blimp-1	0.78	-	# TTAGCGAAATTG	0.735302954	0.997896845	2647461529
chr2L	5290308	5290320	13	CR44743_5288667	>blimp-1	0.79	-	# CAAGTGCAAGTG	0.572058087	0.997896845	2054538435
chr2L	3563698	3563710	13	CR44747_3563502	>blimp-1	0.78	-	# TTATTGAAAGTC	0.735302954	0.997896845	330269234
chr2L	15161953	15161965	13	CR44771_15160126	>blimp-1	0.8	+	# GAAGTTAAAGTA	0.450375563	0.997896845	2170307657
chr2L	6509981	6509993	13	CR44775_6508404	>blimp-1	0.77	+	# GCAGTTCAAGTG	0.83555333	0.997896845	2269153888
chr2L	21321183	21321195	13	CR44785_21320320	>blimp-1	0.77	-	# GGCCTGAAAGTG	0.83555333	0.997896845	2720769277
chr2L	2259924	2259936	13	CR44787_2258000	>blimp-1	0.8	+	# GCATTGAAAGTT	0.450375563	0.997896845	2667615349
chr2L	5566028	5566040	13	CR44794_5565755	>blimp-1	0.79	+	# TAAGTGACAGTG	0.572058087	0.997896845	2533307688
chr2L	992016	992028	13	CR44801_991300	>blimp-1	0.75	-	# GTAATGAAAAGG	0.942814221	0.997896845	2690999997
chr2L	5662588	5662600	13	CR44821_5662232	>blimp-1	0.75	-	# TTACTGAACGTG	0.942814221	0.997896845	3025076981
chr2L	6230310	6230322	13	CR44823_6231807	>blimp-1	0.77	-	# TTAGAGAAACTG	0.83555333	0.997896845	2278153878
chr2L	7794696	7794708	13	CR44825_7795849	>blimp-1	0.76	-	# GGAGTGAAACAG	0.904056084	0.997896845	3626999958
chr2L	15517772	15517784	13	CR44864_15516727	>blimp-1	0.77	+	# CTAATGAAAATG	0.83555333	0.997896845	2604692264
chr2L	15608205	15608217	13	CR44865_15610171	>blimp-1	0.78	+	# GGATTAAAAGTG	0.735302954	0.997896845	2762153928
chr2L	15911110	15911122	13	CR44867_15911691	>blimp-1	0.83	+	# AAAGCGAAAGTG	0.276815223	0.997896845	2904538443
chr2L	16075276	16075288	13	CR44870_16073569	>blimp-1	0.78	+	# GAAGTGAAAGAC	0.735302954	0.997896845	3230384652
chr2L	16075291	16075303	13	CR44870_16073569	>blimp-1	0.93	-	# GGAGTGAAAGTG	0.010415623	0.997896845	2718307654
chr2L	9961330	9961342	13	CR44872_9960232	>blimp-1	0.82	-	# GTAGTGATATTG	0.316875313	0.997896845	2152153822
chr2L	10052993	10053005	13	CR44875_10053604	>blimp-1	0.82	-	# AAATTGAAAGTG	0.316875313	0.997896845	2923769194
chr2L	1379616	1379628	13	CR44897_1381211	>blimp-1	0.84	+	# GTAGTTAAAATG	0.236154231	0.997896845	3497769237
chr2L	1383073	1383085	13	CR44898_1381326	>blimp-1	0.78	-	# ATACTGAAAGCG	0.735302954	0.997896845	3430461526
chr2L	18280533	18280545	13	CR44902_18279475	>blimp-1	0.76	-	# GTAATGAAAATT	0.904056084	0.997896845	2072076926
chr2L	18796738	18796750	13	CR44904_18796180	>blimp-1	0.78	-	# ATAGCGACAGTG	0.735302954	0.997896845	2762076917
chr2L	21166050	21166062	13	CR44910_21164271	>blimp-1	0.78	+	# ATAGTTAAATTG	0.735302954	0.997896845	2535923096
chr2L	2428165	2428177	13	CR44912_2427881	>blimp-1	0.82	+	# GTAGTGAGAGTC	0.316875313	0.997896845	2937000009
chr2L	2428820	2428832	13	CR44912_2427881	>blimp-1	0.76	-	# GAAGTGCCAGTG	0.904056084	0.997896845	2867153855
chr2L	22000679	22000691	13	CR44916_22000420	>blimp-1	0.78	-	# TTAGTAAAAGTT	0.735302954	0.997896845	3817307692
chr2L	21869051	21869063	13	CR44919_21868020	>blimp-1	0.76	-	# TTAATGAAAATG	0.904056084	0.997896845	4376461396
chr2L	10297255	10297267	13	CR44968_10297730	>blimp-1	0.85	+	# CTGGTGAAAGTG	0.170255383	0.997896845	2473769209
chr2L	10297054	10297066	13	CR44968_10297730	>blimp-1	0.75	-	# GTGATGAAACTG	0.942814221	0.997896845	3395384562
chr2L	1707954	1707966	13	CR44976_1708452	>blimp-1	0.76	-	# GGCGTGAAAATG	0.904056084	0.997896845	3208615386
chr2L	20485682	20485694	13	CR44980_20484702	>blimp-1	0.75	+	# GTAATGAAAATC	0.942814221	0.997896845	2845923013
chr2L	20485566	20485578	13	CR44980_20484702	>blimp-1	0.85	-	# TTAATGAAAGTG	0.170255383	0.997896845	2290846146
chr2L	20873539	20873551	13	CR44981_20874114	>blimp-1	0.86	-	# GTATCGAAAGTG	0.119479219	0.997896845	2606307676
chr2L	20873071	20873083	13	CR44981_20874114	>blimp-1	0.85	-	# GTATAGAAAGTG	0.170255383	0.997896845	2971461576
chr2L	8702626	8702638	13	CR44992_8703475	>blimp-1	0.76	+	# TTAGTTCAAGTG	0.904056084	0.997896845	3013076874
chr2L	10241321	10241333	13	CR44995_10242685	>blimp-1	0.75	-	# TTAGTGGAAATG	0.942814221	0.997896845	4004692358
chr2L	7993461	7993473	13	CR44996_7994798	>blimp-1	0.75	-	# GTTGCGGAAGTG	0.942814221	0.997896845	2199846116
chr2L	19325967	19325979	13	CR45258_19327367	>blimp-1	0.78	-	# GATGTCAAAGTG	0.735302954	0.997896845	3391230767
chr2L	902564	902576	13	CR45261_904029	>blimp-1	0.85	+	# CTAATGAAAGTG	0.170255383	0.997896845	2512692304
chr2L	12317797	12317809	13	CR45282_12316122	>blimp-1	0.78	+	# GCAGTTAAATTG	0.735302954	0.997896845	2486846135
chr2L	12316431	12316443	13	CR45282_12316122	>blimp-1	0.78	+	# GAACTGGAAGTG	0.735302954	0.997896845	3483461563
chr2L	16964778	16964790	13	CR45285_16965475	>blimp-1	0.79	-	# ATAGCCAAAGTG	0.572058087	0.997896845	3319461584
chr2L	2474322	2474334	13	CR45286_2472978	>blimp-1	0.76	-	# GTTGTTAAAGTT	0.904056084	0.997896845	3104153862
chr2L	5938933	5938945	13	CR45288_5940033	>blimp-1	0.77	+	# ATCGTGAAAATG	0.83555333	0.997896845	3265769243
chr2L	5940239	5940251	13	CR45289_5941995	>blimp-1	0.76	+	# GTAATGAAAATA	0.904056084	0.997896845	24853077
chr2L	2190190	2190202	13	CR45290_2189405	>blimp-1	0.76	+	# GCAGTGATTGTG	0.904056084	0.997896845	2494846195
chr2L	2190725	2190737	13	CR45290_2189405	>blimp-1	0.85	-	# GGAGTGAAAGTC	0.170255383	0.997896845	3535076861
chr2L	5061637	5061649	13	CR45291_5060806	>blimp-1	0.77	-	# GCTGTGAAATTG	0.83555333	0.997896845	293284623
chr2L	5062507	5062519	13	CR45291_5060806	>blimp-1	0.78	-	# ATTTTGAAAGTG	0.735302954	0.997896845	2692923051
chr2L	7329665	7329677	13	CR45304_7329519	>blimp-1	0.75	-	# GTGGTAAAAATG	0.942814221	0.997896845	2835538497
chr2L	7331089	7331101	13	CR45304_7329519	>blimp-1	0.76	-	# TTAGTCATAGTG	0.904056084	0.997896845	2783846191
chr2L	20720453	20720465	13	CR45306_20721914	>blimp-1	0.88	+	# GCAGCGAAAGTG	0.041161743	0.997896845	2039538438
chr2L	22032194	22032206	13	CR45335_22032625	>blimp-1	0.77	-	# GTATGGAAATTG	0.83555333	0.997896845	2794999996
chr2L	2842189	2842201	13	CR45342_2840316	>blimp-1	0.75	+	# GTAGTGAAACGA	0.942814221	0.997896845	2204538435
chr2L	4000877	4000889	13	CR45344_4001084	>blimp-1	0.79	+	# GAAGTGAAATTT	0.572058087	0.997896845	3965692355
chr2L	855612	855624	13	CR45345_857403	>blimp-1	0.78	+	# CTGGAGAAAGTG	0.735302954	0.997896845	2457153801
chr2L	1216160	1216172	13	CR45346_1215293	>blimp-1	0.82	+	# GTAATGATAGTG	0.316875313	0.997896845	3553384636
chr2L	1217050	1217062	13	CR45346_1215293	>blimp-1	0.8	-	# AGAGTGAAAGTA	0.450375563	0.997896845	2587538403
chr2L	20560580	20560592	13	CR45347_20562247	>blimp-1	0.75	-	# AAAGCAAAAGTG	0.942814221	0.997896845	3091923053
chr2L	15279180	15279192	13	CR45349_15280028	>blimp-1	0.79	+	# GCAATTAAAGTG	0.572058087	0.997896845	3287307758
chr2L	16534969	16534981	13	CR45354_16534488	>blimp-1	0.87	-	# GCAGTCAAAGTG	0.067100651	0.997896845	2006230747
chr2L	16996614	16996626	13	CR45356_16998327	>blimp-1	0.78	-	# GAAATGTAAGTG	0.735302954	0.997896845	3372999916
chr2L	16996364	16996376	13	CR45356_16998327	>blimp-1	0.77	-	# CTAATGAAAATG	0.83555333	0.997896845	3619769133
chr2L	17575610	17575622	13	CR45358_17575490	>blimp-1	0.75	+	# GTAGTCAAGGTT	0.942814221	0.997896845	2497538411
chr2L	20486772	20486784	13	CR45360_20487976	>blimp-1	0.75	-	# GTAATAAAATTG	0.942814221	0.997896845	3041615339
chr2L	20483686	20483698	13	CR45361_20484399	>blimp-1	0.78	+	# GTATAGAAAGTA	0.735302954	0.997896845	2553769258
chr2L	4365010	4365022	13	CR45363_4364252	>blimp-1	0.8	-	# AAAGTGCAAGTG	0.450375563	0.997896845	3326461609
chr2L	8853509	8853521	13	CR45365_8852664	>blimp-1	0.84	+	# GTAGCGAAAATG	0.236154231	0.997896845	2952692358
chr2L	357188	357200	13	CR45366_357329	>blimp-1	0.83	+	# GTACTGAAAGAG	0.276815223	0.997896845	2919615409
chr2L	357180	357192	13	CR45366_357329	>blimp-1	0.75	-	# GTACTGGAAGTA	0.942814221	0.997896845	4068769304
chr2L	356403	356415	13	CR45366_357329	>blimp-1	0.77	-	# GCAGTTACAGTG	0.83555333	0.997896845	2412615405
chr2L	15836195	15836207	13	CR45368_15834416	>blimp-1	0.76	+	# GTAATGAAATTA	0.904056084	0.997896845	3703769143
chr2L	4634661	4634673	13	CR45452_4634342	>blimp-1	0.82	+	# GTTGTGAAAATG	0.316875313	0.997896845	2825461516
chr2L	13103958	13103970	13	CR45461_13104680	>blimp-1	0.78	-	# GAAATGCAAGTG	0.735302954	0.997896845	2344461579
chr2L	17019889	17019901	13	CR45462_17018049	>blimp-1	0.77	-	# GGCGGGAAAGTG	0.83555333	0.997896845	2628999985
chr2L	1648991	1649003	13	CR45695_1647163	>blimp-1	0.75	+	# GTACTCAAACTG	0.942814221	0.997896845	2226692317
chr2L	1647803	1647815	13	CR45695_1647163	>blimp-1	0.76	-	# GTAGTAAAAATT	0.904056084	0.997896845	3650692225
chr2L	17545188	17545200	13	CR45697_17547185	>blimp-1	0.77	+	# CTTGTAAAAGTG	0.83555333	0.997896845	3484923051
chr2L	17579236	17579248	13	CR45698_17579478	>blimp-1	0.8	-	# GAATGGAAAGTG	0.450375563	0.997896845	2922692336
chr2L	20512436	20512448	13	CR45702_20513832	>blimp-1	0.75	+	# GTTGGGAAAATG	0.942814221	0.997896845	2502461525
chr2L	21950221	21950233	13	CR45703_21950874	>blimp-1	0.84	-	# TTAGTGAAAATG	0.236154231	0.997896845	2040846156
chr2L	2629002	2629014	13	CR45705_2627855	>blimp-1	0.79	-	# AGAGTGAAATTG	0.572058087	0.997896845	2819230758
chr2L	20541777	20541789	13	CR45707_20539974	>blimp-1	0.77	+	# TTAGTCAAAGTC	0.83555333	0.997896845	3378461512
chr2L	20541154	20541166	13	CR45707_20539974	>blimp-1	0.78	+	# GTAGCCAAAGTA	0.735302954	0.997896845	3395461458
chr2L	2006147	2006159	13	CR45712_2006867	>blimp-1	0.79	+	# CGACTGAAAGTG	0.572058087	0.997896845	2255461542
chr2L	2005817	2005829	13	CR45712_2006867	>blimp-1	0.89	-	# AAAGTGAAAGTG	0.030245368	0.997896845	2879076939
chr2L	4892109	4892121	13	CR45716_4891845	>blimp-1	0.78	+	# GAACTGAAAATG	0.735302954	0.997896845	2055153877
chr2L	19467436	19467448	13	CR45722_19469126	>blimp-1	0.81	+	# AAAGTGAAACTG	0.374862293	0.997896845	2277384634
chr2L	19467517	19467529	13	CR45722_19469126	>blimp-1	0.78	+	# GCACTGAAAATG	0.735302954	0.997896845	2330000019
chr2L	19467233	19467245	13	CR45722_19469126	>blimp-1	0.76	-	# GTAGGGAAACTA	0.904056084	0.997896845	2828230812
chr2L	14875240	14875252	13	CR45727_14876832	>blimp-1	1	+	# GTAGTGAAAGTG	0.000600901	0.997896845	2266076955
chr2L	17279072	17279084	13	CR45729_17280235	>blimp-1	0.75	+	# GTTGGGAAAATG	0.942814221	0.997896845	204761537
chr2L	5298660	5298672	13	CR45730_5297928	>blimp-1	0.76	+	# GTAATGAAATTA	0.904056084	0.997896845	3301615376
chr2L	7567150	7567162	13	CR46063_7567929	>blimp-1	0.78	+	# GAAATGAAAATG	0.735302954	0.997896845	2171692304
chr2L	2515802	2515814	13	CR46069_2517290	>blimp-1	0.77	-	# ATAATGAAAATG	0.83555333	0.997896845	2066769255
chr2L	12039087	12039099	13	CR46070_12040782	>blimp-1	0.76	-	# GAAGTGGACGTG	0.904056084	0.997896845	2761615396
chr2L	11943828	11943840	13	Cry_11944129	>blimp-1	0.76	-	# GTACGGAAATTG	0.904056084	0.997896845	2598692356
chr2L	15273079	15273091	13	Cul3_15272024	>blimp-1	0.79	+	# TCGGTGAAAGTG	0.572058087	0.997896845	257446157
chr2L	11815341	11815353	13	CycY_11813780	>blimp-1	0.84	+	# GTGGTAAAAGTG	0.236154231	0.997896845	3394538448
chr2L	10301193	10301205	13	CYLD_10299847	>blimp-1	0.75	+	# ATAGTGCACGTG	0.942814221	0.997896845	2676769236
chr2L	2574061	2574073	13	Cyp309a2_2573037	>blimp-1	0.76	+	# GGTGTGAAAATG	0.904056084	0.997896845	2216923048
chr2L	18654194	18654206	13	Cyp310a1_18653010	>blimp-1	0.78	+	# GCATTGAAACTG	0.735302954	0.997896845	235353847
chr2L	5262927	5262939	13	Cyp4ac1_5264001	>blimp-1	0.78	-	# GAAGTAAATGTG	0.735302954	0.997896845	2048538443
chr2L	5264595	5264607	13	Cyp4ac2_5266392	>blimp-1	0.79	-	# GAAGTGAAAGGC	0.572058087	0.997896845	2716769241
chr2L	7604450	7604462	13	Cyp4d21_7605600	>blimp-1	0.78	+	# GCACTGAAAGTC	0.735302954	0.997896845	2563692263
chr2L	16792527	16792539	13	Cyt-b5-r_16790721	>blimp-1	0.8	+	# AGATTGAAAGTG	0.450375563	0.997896845	336930769
chr2L	15247170	15247182	13	dao_15248879	>blimp-1	0.78	+	# CTACGGAAAGTG	0.735302954	0.997896845	312653857
chr2L	15247162	15247174	13	dao_15248879	>blimp-1	0.76	-	# GTAGTAAAAATT	0.904056084	0.997896845	3606538571
chr2L	21144298	21144310	13	Dap160_21142347	>blimp-1	0.76	-	# GTAAAGAAACTG	0.904056084	0.997896845	2921000062
chr2L	1973060	1973072	13	Der-1_1973957	>blimp-1	0.78	-	# GTAACGAAAGTA	0.735302954	0.997896845	2079923122
chr2L	20756810	20756822	13	dia_20758144	>blimp-1	0.76	+	# GTTGTTAAAGTA	0.904056084	0.997896845	3293923108
chr2L	4402647	4402659	13	Dim1_4403251	>blimp-1	0.83	-	# GTAGTCGAAGTG	0.276815223	0.997896845	2152461524
chr2L	4402629	4402641	13	Dim1_4403251	>blimp-1	0.75	-	# ATAGTGATCGTG	0.942814221	0.997896845	221246154
chr2L	823992	824004	13	dock_825969	>blimp-1	0.76	+	# GTAACGAAAATG	0.904056084	0.997896845	221207694
chr2L	4592011	4592023	13	dp_4591963	>blimp-1	0.78	-	# GAACTGAATGTG	0.735302954	0.997896845	3148230754
chr2L	2448365	2448377	13	dpp_2450193	>blimp-1	0.81	+	# CCAGTGAAAGTA	0.374862293	0.997896845	2733846103
chr2L	2449770	2449782	13	dpp_2450193	>blimp-1	0.78	+	# GCAGTTAAAATG	0.735302954	0.997896845	3249846147
chr2L	10965634	10965646	13	dpr2_10964153	>blimp-1	0.75	-	# TTTGTGAAACTG	0.942814221	0.997896845	3040000008
chr2L	13287572	13287584	13	Drep-4_13286462	>blimp-1	0.82	+	# GTAGTGCAAATG	0.316875313	0.997896845	2226230773
chr2L	19188768	19188780	13	drl_19190342	>blimp-1	0.78	+	# GAACTGCAAGTG	0.735302954	0.997896845	3188999939
chr2L	11010654	11010666	13	dUTPase_11011312	>blimp-1	0.82	-	# GTGGTGAAGGTG	0.316875313	0.997896845	2946461535
chr2L	5053484	5053496	13	eIF-3p40_5052780	>blimp-1	0.76	+	# GTAGAGAAAGGC	0.904056084	0.997896845	2925384575
chr2L	5981803	5981815	13	eIF-4a_5982594	>blimp-1	0.77	+	# GTATAAAAAGTG	0.83555333	0.997896845	4182307684
chr2L	1730190	1730202	13	Eno_1728463	>blimp-1	0.85	-	# GGAGTGAAATTG	0.170255383	0.997896845	2109230746
chr2L	6488073	6488085	13	epsilonCOP_6489090	>blimp-1	0.76	+	# GTAGTCAAAGAT	0.904056084	0.997896845	2377307728
chr2L	15333646	15333658	13	esg_15333866	>blimp-1	0.75	+	# TTGGTGCAAGTG	0.942814221	0.997896845	3331384659
chr2L	9913824	9913836	13	Etl1_9912608	>blimp-1	0.77	-	# ATTGTGAAAGAG	0.83555333	0.997896845	3325461511
chr2L	2310797	2310809	13	eys_2311680	>blimp-1	0.79	-	# ATAGACAAAGTG	0.572058087	0.997896845	2861846172
chr2L	18318214	18318226	13	Fas3_18320102	>blimp-1	0.76	+	# TTATTGAATGTG	0.904056084	0.997896845	2505384656
chr2L	9425095	9425107	13	Fbp2_9426784	>blimp-1	0.78	+	# GAACTGAATGTG	0.735302954	0.997896845	2083230748
chr2L	19386362	19386374	13	fon_19386205	>blimp-1	0.76	-	# GTGATGAAAGTT	0.904056084	0.997896845	2770846202
chr2L	3658545	3658557	13	for_3656953	>blimp-1	0.76	+	# TTAATGAAATTG	0.904056084	0.997896845	3814461543
chr2L	3658449	3658461	13	for_3656953	>blimp-1	0.79	+	# AGAGTGAAATTG	0.572058087	0.997896845	2100153854
chr2L	1716725	1716737	13	frtz_1715851	>blimp-1	0.78	+	# TTAGTTAAAGTT	0.735302954	0.997896845	2759615353
chr2L	9430282	9430294	13	FucTB_9430000	>blimp-1	0.78	-	# GAAATGGAAGTG	0.735302954	0.997896845	249492309
chr2L	17481563	17481575	13	fws_17481029	>blimp-1	0.82	+	# GTGGTGAATGTG	0.316875313	0.997896845	3103461557
chr2L	2816658	2816670	13	G6P_2815760	>blimp-1	0.75	-	# GTACTGAAAGCC	0.942814221	0.997896845	3449230795
chr2L	15015912	15015924	13	GABA-B-R1_15016331	>blimp-1	0.75	-	# GTTTTGAAAGCG	0.942814221	0.997896845	3359922996
chr2L	752340	752352	13	GABA-B-R3_752800	>blimp-1	0.78	+	# GCAATGAAAGCG	0.735302954	0.997896845	3123230705
chr2L	72676	72688	13	galectin_74129	>blimp-1	0.79	-	# ATATTAAAAGTG	0.572058087	0.997896845	2096153892
chr2L	19187370	19187382	13	gammaTub37C_19185726	>blimp-1	0.75	+	# GTAGCGCAAATG	0.942814221	0.997896845	2737153824
chr2L	19187273	19187285	13	gammaTub37C_19185726	>blimp-1	0.85	+	# GTAGGCAAAGTG	0.170255383	0.997896845	3768384549
chr2L	19186360	19186372	13	gammaTub37C_19185726	>blimp-1	0.85	+	# GGCGTGAAAGTG	0.170255383	0.997896845	2515769191
chr2L	19187515	19187527	13	gammaTub37C_19185726	>blimp-1	0.77	-	# TTTGCGAAAGTG	0.83555333	0.997896845	232361545
chr2L	6951311	6951323	13	Gas41_6950207	>blimp-1	0.77	-	# GTGGCGAAAGTT	0.83555333	0.997896845	4162692348
chr2L	6952148	6952160	13	Gas41_6950207	>blimp-1	0.77	-	# ATTGTGAAATTG	0.83555333	0.997896845	406407693
chr2L	9607343	9607355	13	gcm2_9608562	>blimp-1	0.77	-	# GGCGTTAAAGTG	0.83555333	0.997896845	2749230742
chr2L	9495751	9495763	13	Gdi_9494876	>blimp-1	0.81	-	# AAAGTGAAAATG	0.374862293	0.997896845	3122384594
chr2L	9495780	9495792	13	Gdi_9494876	>blimp-1	0.76	-	# GTATTGAAATTC	0.904056084	0.997896845	2951307664
chr2L	9495871	9495883	13	Gdi_9494876	>blimp-1	0.78	-	# GAAGTGAAAAAG	0.735302954	0.997896845	2013692304
chr2L	9271018	9271030	13	Ggamma30A_9272502	>blimp-1	0.78	+	# GTATTTAAAGTT	0.735302954	0.997896845	2813153909
chr2L	16739283	16739295	13	glu_16738388	>blimp-1	0.77	-	# GGTGTGAAAGTT	0.83555333	0.997896845	34601538
chr2L	913260	913272	13	GluRIIC_914086	>blimp-1	0.82	+	# GTTGTGTAAGTG	0.316875313	0.997896845	24817693
chr2L	4978288	4978300	13	Gmd_4977023	>blimp-1	0.86	+	# GCAATGAAAGTG	0.119479219	0.997896845	242392306
chr2L	780288	780300	13	Gr21a_781276	>blimp-1	0.77	+	# GTCTTGAAAGTT	0.83555333	0.997896845	2974076962
chr2L	780335	780347	13	Gr21a_781276	>blimp-1	0.78	+	# GCAATGAAAATG	0.735302954	0.997896845	2539307709
chr2L	780811	780823	13	Gr21a_781276	>blimp-1	0.8	-	# GAAATGAAAGTT	0.450375563	0.997896845	4132846209
chr2L	1758112	1758124	13	Gr22f_1756451	>blimp-1	0.79	-	# GCATTTAAAGTG	0.572058087	0.997896845	2764384618
chr2L	2667822	2667834	13	Gr23a_2669823	>blimp-1	0.78	+	# CTACTCAAAGTG	0.735302954	0.997896845	249861537
chr2L	7462826	7462838	13	Gr28b_7462247	>blimp-1	0.76	+	# TTAGTCAAATTG	0.904056084	0.997896845	209007693
chr2L	10481375	10481387	13	Grip75_10483295	>blimp-1	0.82	-	# GTGGTGAATGTG	0.316875313	0.997896845	410769237
chr2L	11150528	11150540	13	Gyc32E_11149101	>blimp-1	0.78	+	# GCATTGAAATTG	0.735302954	0.997896845	2321769225
chr2L	18788984	18788996	13	ham_18787500	>blimp-1	0.75	+	# AAAGCAAAAGTG	0.942814221	0.997896845	2474769262
chr2L	18783656	18783668	13	ham_18782600	>blimp-1	0.8	-	# GAAGACAAAGTG	0.450375563	0.997896845	2241923035
chr2L	16676885	16676897	13	her_16677185	>blimp-1	0.75	+	# GTAGTAAAACGG	0.942814221	0.997896845	2147615403
chr2L	16676075	16676087	13	her_16677185	>blimp-1	0.8	-	# CAAGTGAAAGAG	0.450375563	0.997896845	2039384594
chr2L	19033927	19033939	13	hk_19033498	>blimp-1	0.76	-	# TTCCTGAAAGTG	0.904056084	0.997896845	2063923048
chr2L	19034061	19034073	13	hk_19033498	>blimp-1	0.76	-	# TTGGTGAAATTG	0.904056084	0.997896845	2812923085
chr2L	8709575	8709587	13	Hnf4_8709042	>blimp-1	0.8	-	# AGAGTAAAAGTG	0.450375563	0.997896845	2099384612
chr2L	4929615	4929627	13	hoe1_4928393	>blimp-1	0.76	+	# TTATTGAATGTG	0.904056084	0.997896845	2193846186
chr2L	4928581	4928593	13	hoe1_4928393	>blimp-1	0.79	-	# GCATTGAAAGCG	0.572058087	0.997896845	2321923036
chr2L	4936547	4936559	13	hoe2_4936450	>blimp-1	0.87	-	# ATATTGAAAGTG	0.067100651	0.997896845	2835692197
chr2L	9698880	9698892	13	hoip_9699829	>blimp-1	0.77	+	# TTAGTTAAATTG	0.83555333	0.997896845	2769076888
chr2L	9699154	9699166	13	hoip_9699829	>blimp-1	0.76	-	# TTTCTGAAAGTG	0.904056084	0.997896845	2414153856
chr2L	10434005	10434017	13	holn1_10435995	>blimp-1	0.77	+	# GAAGTGAATTTG	0.83555333	0.997896845	2677615369
chr2L	10434245	10434257	13	holn1_10435995	>blimp-1	0.77	+	# GTAGAAAAAGTT	0.83555333	0.997896845	3131615405
chr2L	4579004	4579016	13	HP6_4578218	>blimp-1	0.78	+	# CTCTTGAAAGTG	0.735302954	0.997896845	3298615401
chr2L	6920802	6920814	13	Hrb27C_6921260	>blimp-1	0.75	+	# TTAGTGAATTTG	0.942814221	0.997896845	4132692392
chr2L	1044324	1044336	13	IA-2_1043218	>blimp-1	0.81	+	# ACATTGAAAGTG	0.374862293	0.997896845	2510692347
chr2L	20675214	20675226	13	ik2_20676045	>blimp-1	0.76	-	# TTAGTGAAATCG	0.904056084	0.997896845	2474846148
chr2L	4477549	4477561	13	ine_4477022	>blimp-1	0.78	+	# ATAGTTAAATTG	0.735302954	0.997896845	3207153944
chr2L	4478308	4478320	13	ine_4477022	>blimp-1	0.76	-	# TTAGTGGAAGTA	0.904056084	0.997896845	3652153868
chr2L	10406626	10406638	13	Ip259_10408352	>blimp-1	0.8	-	# ACAGTGAAATTG	0.450375563	0.997896845	2882615461
chr2L	10403916	10403928	13	Ir31a_10405565	>blimp-1	0.89	+	# AAAGTGAAAGTG	0.030245368	0.997896845	269653846
chr2L	9565472	9565484	13	jp_9565438	>blimp-1	0.78	-	# GAAATGAAAATG	0.735302954	0.997896845	2170153829
chr2L	18706718	18706730	13	Jwa_18705703	>blimp-1	0.78	-	# GAAGAGATAGTG	0.735302954	0.997896845	2609923011
chr2L	10412748	10412760	13	Klp31E_10414590	>blimp-1	0.86	-	# TGAGTGAAAGTG	0.119479219	0.997896845	2532769267
chr2L	4973374	4973386	13	l(2)05714_4971485	>blimp-1	0.77	+	# GATGTGGAAGTG	0.83555333	0.997896845	2754076944
chr2L	15010923	15010935	13	l(2)35Bc_15009724	>blimp-1	0.8	+	# CAAGTGAAACTG	0.450375563	0.997896845	3335076945
chr2L	15010695	15010707	13	l(2)35Bc_15009724	>blimp-1	0.78	+	# ATAGTGAAAGGC	0.735302954	0.997896845	4370384638
chr2L	15010344	15010356	13	l(2)35Bc_15009724	>blimp-1	0.76	+	# GTTGTTAAAGTT	0.904056084	0.997896845	3782384542
chr2L	15008919	15008931	13	l(2)35Bd_15009939	>blimp-1	0.76	-	# GTACAGAAAGGG	0.904056084	0.997896845	2667307647
chr2L	19128550	19128562	13	l(2)37Cb_19126976	>blimp-1	0.75	+	# GTAGGGATAGTC	0.942814221	0.997896845	2683538515
chr2L	19131083	19131095	13	l(2)37Ce_19132323	>blimp-1	0.78	-	# GAACTGAACGTG	0.735302954	0.997896845	2787153825
chr2L	4393037	4393049	13	l(2)k05819_4394196	>blimp-1	0.76	+	# GTACCGTAAGTG	0.904056084	0.997896845	3061461519
chr2L	21259654	21259666	13	l(2)k14505_21261168	>blimp-1	0.75	+	# GTAATAAAAATG	0.942814221	0.997896845	3015000025
chr2L	15498480	15498492	13	lace_15499127	>blimp-1	0.75	-	# GTAGTAAAATTC	0.942814221	0.997896845	3842384467
chr2L	7814323	7814335	13	LanB1_7814354	>blimp-1	0.78	-	# GAACTGAAACTG	0.735302954	0.997896845	2090769246
chr2L	19605335	19605347	13	Lar_19606569	>blimp-1	0.79	-	# TAAGTGAATGTG	0.572058087	0.997896845	2874692302
chr2L	19609655	19609667	13	Lar_19611410	>blimp-1	0.77	+	# GTAAACAAAGTG	0.83555333	0.997896845	3063461542
chr2L	1421283	1421295	13	lea_1420453	>blimp-1	0.79	-	# GAAATCAAAGTG	0.572058087	0.997896845	2179461525
chr2L	3718990	3719002	13	lectin-24A_3717773	>blimp-1	0.76	+	# GTATTTAAAATG	0.904056084	0.997896845	3359846152
chr2L	5997929	5997941	13	lid_5996785	>blimp-1	0.76	-	# GGAGTAGAAGTG	0.904056084	0.997896845	2033769206
chr2L	5998974	5998986	13	lid_5997764	>blimp-1	0.77	+	# ATTGTGAAAATG	0.83555333	0.997896845	262869223
chr2L	2890025	2890037	13	lilli_2890171	>blimp-1	0.76	+	# GTGGAAAAAGTG	0.904056084	0.997896845	2117769218
chr2L	19083098	19083110	13	Lim3_19082221	>blimp-1	0.8	+	# ACTGTGAAAGTG	0.450375563	0.997896845	2368000021
chr2L	10708096	10708108	13	Lip2_10706190	>blimp-1	0.83	-	# GTAATGAAAATG	0.276815223	0.997896845	3492692232
chr2L	7797446	7797458	13	LKR_7795959	>blimp-1	0.78	-	# GGAGTTAAAGTA	0.735302954	0.997896845	3615615363
chr2L	8528300	8528312	13	lmgB_8528066	>blimp-1	0.81	+	# AAAATGAAAGTG	0.374862293	0.997896845	4120153776
chr2L	8528132	8528144	13	lmgB_8528066	>blimp-1	0.76	-	# GCAGTGCATGTG	0.904056084	0.997896845	4503384682
chr2L	20060630	20060642	13	lok_20061497	>blimp-1	0.75	+	# GTCGTTAAAGGG	0.942814221	0.997896845	2122923082
chr2L	17385574	17385586	13	Lrch_17384115	>blimp-1	0.77	+	# GTATTAAAAGTA	0.83555333	0.997896845	2240076889
chr2L	11848929	11848941	13	Mal-B2_11850307	>blimp-1	0.76	+	# ATTGTGAACGTG	0.904056084	0.997896845	2207769257
chr2L	11848202	11848214	13	Mal-B2_11849958	>blimp-1	0.8	-	# GAAGTCAAAGTT	0.450375563	0.997896845	3689999902
chr2L	11848190	11848202	13	Mal-B2_11849958	>blimp-1	0.79	-	# GAAGGGAAACTG	0.572058087	0.997896845	2637384579
chr2L	4460826	4460838	13	mRpL27_4459602	>blimp-1	0.77	-	# GGAGCGCAAGTG	0.83555333	0.997896845	284115383
chr2L	1709612	1709624	13	mRpL48_1710462	>blimp-1	0.78	+	# TTACCGAAAGTG	0.735302954	0.997896845	2530615343
chr2L	4852125	4852137	13	mRpS2_4850419	>blimp-1	0.84	+	# GTAAAGAAAGTG	0.236154231	0.997896845	3347692251
chr2L	14327214	14327226	13	ms(2)34Fe_14328429	>blimp-1	0.8	-	# CCAGTGAAAGCG	0.450375563	0.997896845	2590230808
chr2L	15291475	15291487	13	ms(2)35Ci_15292468	>blimp-1	0.8	-	# TCAGTGAAAGTA	0.450375563	0.997896845	2442000056
chr2L	15290768	15290780	13	ms(2)35Ci_15292468	>blimp-1	0.78	-	# CGAGTGCAAGTG	0.735302954	0.997896845	2656846129
chr2L	5107527	5107539	13	Msp300_5108814	>blimp-1	0.77	-	# TTAATGAAAGTC	0.83555333	0.997896845	3193230785
chr2L	12095533	12095545	13	Mt2_12096550	>blimp-1	0.75	+	# GTGGTAAAATTG	0.942814221	0.997896845	3212923096
chr2L	7826892	7826904	13	mts_7827650	>blimp-1	0.76	+	# GAAGTGCGAGTG	0.904056084	0.997896845	4161769188
chr2L	7664890	7664902	13	Myo28B1_7666047	>blimp-1	0.76	+	# CTAGTCAACGTG	0.904056084	0.997896845	2275461536
chr2L	15319656	15319668	13	nht_15318901	>blimp-1	0.76	-	# GGAATGCAAGTG	0.904056084	0.997896845	2627076961
chr2L	13957304	13957316	13	NimA_13957539	>blimp-1	0.83	-	# AAAGCGAAAGTG	0.276815223	0.997896845	3070076979
chr2L	13969441	13969453	13	NimB3_13967985	>blimp-1	0.76	-	# GTACTGAAAGAA	0.904056084	0.997896845	3456615494
chr2L	7377536	7377548	13	ninaC_7377736	>blimp-1	0.79	-	# CGAGTGAAAGTC	0.572058087	0.997896845	2366923075
chr2L	21589948	21589960	13	nompB_21589423	>blimp-1	0.77	+	# GTGGAGAAAGTA	0.83555333	0.997896845	2480846116
chr2L	10839376	10839388	13	Nos_10837511	>blimp-1	0.81	-	# AAACTGAAAGTG	0.374862293	0.997896845	2741692356
chr2L	20750508	20750520	13	Ns4_20752476	>blimp-1	0.78	+	# CTAGTGAAATTT	0.735302954	0.997896845	2941846192
chr2L	20751974	20751986	13	Ns4_20752476	>blimp-1	0.79	-	# GCAGGGAAAGCG	0.572058087	0.997896845	2312846116
chr2L	10437894	10437906	13	Nse4_10439440	>blimp-1	0.78	+	# GCAGGGAAACTG	0.735302954	0.997896845	3477769258
chr2L	18453034	18453046	13	Ntf-2r_18454649	>blimp-1	0.85	-	# GCAGTGAACGTG	0.170255383	0.997896845	291169235
chr2L	7710103	7710115	13	Ntl_7711487	>blimp-1	0.76	-	# GTAATCAAAGTA	0.904056084	0.997896845	254199996
chr2L	2886260	2886272	13	NTPase_2885214	>blimp-1	0.78	+	# GCAGTCAAAGTC	0.735302954	0.997896845	221530769
chr2L	6632791	6632803	13	Oatp26F_6632407	>blimp-1	0.76	+	# GTAATGAAACTA	0.904056084	0.997896845	2040846182
chr2L	9519293	9519305	13	Oatp30B_9521210	>blimp-1	0.75	+	# CTAGTGATAATG	0.942814221	0.997896845	2490846195
chr2L	9520160	9520172	13	Oatp30B_9521210	>blimp-1	0.8	+	# GAAGCGAAAATG	0.450375563	0.997896845	2206538455
chr2L	7499131	7499143	13	Obp28a_7497365	>blimp-1	0.8	-	# GAAGGGAAAGTT	0.450375563	0.997896845	3273153823
chr2L	17587462	17587474	13	Oli_17589402	>blimp-1	0.77	-	# GTAGGGAAAATT	0.83555333	0.997896845	2272923049
chr2L	2053937	2053949	13	Or22c_2054589	>blimp-1	0.75	+	# AAATTGAAAGTT	0.942814221	0.997896845	2185846132
chr2L	15623641	15623653	13	Or35a_15623558	>blimp-1	0.75	+	# GTTGAGAAACTG	0.942814221	0.997896845	2567384656
chr2L	13828006	13828018	13	Orc5_13829837	>blimp-1	0.76	-	# GTTCCGAAAGTG	0.904056084	0.997896845	2463999975
chr2L	2221410	2221422	13	papi_2223200	>blimp-1	0.77	-	# GCGGTGAAAATG	0.83555333	0.997896845	2604153876
chr2L	2219379	2219391	13	papi_2220748	>blimp-1	0.78	-	# GCATTGAAACTG	0.735302954	0.997896845	3351307727
chr2L	19406339	19406351	13	Pax_19404789	>blimp-1	0.78	-	# GCAATGAAAGCG	0.735302954	0.997896845	3056153806
chr2L	18592097	18592109	13	Pde11_18590342	>blimp-1	0.87	-	# GAAGTCAAAGTG	0.067100651	0.997896845	3685769253
chr2L	11930201	11930213	13	Pde1c_11928572	>blimp-1	0.78	+	# GACGTGAAATTG	0.735302954	0.997896845	3596153897
chr2L	815068	815080	13	Pex12_815993	>blimp-1	0.79	+	# CGAGTGAAAGTA	0.572058087	0.997896845	309723072
chr2L	3428530	3428542	13	pgant2_3426719	>blimp-1	0.76	+	# GTCACGAAAGTG	0.904056084	0.997896845	3319615401
chr2L	3427670	3427682	13	pgant2_3426719	>blimp-1	0.81	+	# AAAGTCAAAGTG	0.374862293	0.997896845	2486769309
chr2L	3428612	3428624	13	pgant2_3426719	>blimp-1	0.77	-	# GGGCTGAAAGTG	0.83555333	0.997896845	2529846168
chr2L	3472701	3472713	13	pgant4_3472735	>blimp-1	0.75	-	# TTAGTGTAATTG	0.942814221	0.997896845	2373999983
chr2L	2753456	2753468	13	Pgk_2753068	>blimp-1	0.75	-	# GTGGAGAAGGTG	0.942814221	0.997896845	2941384618
chr2L	297007	297019	13	Pi3K21B_297880	>blimp-1	0.77	+	# ATAATGAAACTG	0.83555333	0.997896845	3569846096
chr2L	297037	297049	13	Pi3K21B_297880	>blimp-1	0.75	-	# CTAGTGAATCTG	0.942814221	0.997896845	3158923016
chr2L	10424463	10424475	13	pie_10422780	>blimp-1	0.81	+	# CCATTGAAAGTG	0.374862293	0.997896845	3284153944
chr2L	8513903	8513915	13	PIG-U_8515096	>blimp-1	0.79	-	# AGAGTGAAAATG	0.572058087	0.997896845	2146615391
chr2L	12722666	12722678	13	Pih1D1_12721843	>blimp-1	0.84	+	# GTAGTAAAAGTC	0.236154231	0.997896845	305707698
chr2L	1130422	1130434	13	Pino_1128953	>blimp-1	0.75	+	# GTTCTGAAAGTA	0.942814221	0.997896845	3620461447
chr2L	16286990	16287002	13	pkaap_16288290	>blimp-1	0.76	+	# GTAGTAAAAATA	0.904056084	0.997896845	2447846133
chr2L	12396869	12396881	13	Pkd2_12398274	>blimp-1	0.76	-	# TTAATGAAAATG	0.904056084	0.997896845	2243307722
chr2L	1170942	1170954	13	Plap_1170079	>blimp-1	0.76	-	# GTAGCACAAGTG	0.904056084	0.997896845	2875846225
chr2L	8072973	8072985	13	poe_8071624	>blimp-1	0.81	+	# AAAGTGAAACTG	0.374862293	0.997896845	276630768
chr2L	15256800	15256812	13	Pol32_15256304	>blimp-1	0.75	-	# GTGCTGAAAGAG	0.942814221	0.997896845	2092230761
chr2L	14383093	14383105	13	ppk_14381172	>blimp-1	0.75	-	# GTAATTAAATTG	0.942814221	0.997896845	3062230816
chr2L	16762145	16762157	13	ppk17_16760554	>blimp-1	0.78	+	# TGAGTGAAAATG	0.735302954	0.997896845	3018384617
chr2L	9771087	9771099	13	ppk18_9770996	>blimp-1	0.85	-	# CTAATGAAAGTG	0.170255383	0.997896845	2055923069
chr2L	8687347	8687359	13	PrBP_8685955	>blimp-1	0.78	+	# ATGCTGAAAGTG	0.735302954	0.997896845	2662692295
chr2L	8686793	8686805	13	PrBP_8685955	>blimp-1	0.79	+	# AGCGTGAAAGTG	0.572058087	0.997896845	2779999982
chr2L	10260749	10260761	13	Pten_10259987	>blimp-1	0.76	+	# ATAGTGTAAATG	0.904056084	0.997896845	2392846158
chr2L	3375394	3375406	13	Ptpa_3377002	>blimp-1	0.76	-	# GTCGAAAAAGTG	0.904056084	0.997896845	309715392
chr2L	7135044	7135056	13	Pvf3_7133527	>blimp-1	0.79	+	# TAAGTGCAAGTG	0.572058087	0.997896845	2852230778
chr2L	5064203	5064215	13	qtc_5066012	>blimp-1	0.78	+	# GAAATGCAAGTG	0.735302954	0.997896845	2785692297
chr2L	5063264	5063276	13	qtc_5064372	>blimp-1	0.78	-	# GCAGTGAAAATC	0.735302954	0.997896845	2058615378
chr2L	14353791	14353803	13	Rab14_14355145	>blimp-1	0.75	-	# GTGGAGAATGTG	0.942814221	0.997896845	3271692317
chr2L	14353532	14353544	13	Rab14_14355145	>blimp-1	0.75	-	# AAATCGAAAGTG	0.942814221	0.997896845	3090846183
chr2L	12064126	12064138	13	Rab3-GAP_12063184	>blimp-1	0.77	+	# GACGTGAACGTG	0.83555333	0.997896845	3102999953
chr2L	19430806	19430818	13	Rab9_19432574	>blimp-1	0.78	+	# CTGGAGAAAGTG	0.735302954	0.997896845	2877923086
chr2L	5880548	5880560	13	rau_5879498	>blimp-1	0.85	-	# TTAATGAAAGTG	0.170255383	0.997896845	2783153846
chr2L	2957427	2957439	13	Rbp9_2959147	>blimp-1	0.84	-	# GTAGAGAAATTG	0.236154231	0.997896845	2720692286
chr2L	9015954	9015966	13	Rcd-1r_9014068	>blimp-1	0.84	+	# GTACTTAAAGTG	0.236154231	0.997896845	2770538431
chr2L	8381534	8381546	13	Rcd4_8382913	>blimp-1	0.95	+	# GCAGTGAAAGTG	0.004206309	0.997896845	2500461516
chr2L	12648101	12648113	13	Ref2_12646356	>blimp-1	0.79	-	# ACAGTGCAAGTG	0.572058087	0.997896845	2288307706
chr2L	3804041	3804053	13	Reph_3805682	>blimp-1	0.76	+	# GTAGTAAAATTT	0.904056084	0.997896845	2294384608
chr2L	11131983	11131995	13	RfC38_11130645	>blimp-1	0.78	+	# GCAGTGAAAATC	0.735302954	0.997896845	3010615362
chr2L	11131568	11131580	13	RfC38_11130645	>blimp-1	0.77	-	# TTTGCGAAAGTG	0.83555333	0.997896845	2471999982
chr2L	11131926	11131938	13	RfC38_11130645	>blimp-1	0.75	-	# GTGGGGAAATTG	0.942814221	0.997896845	302361535
chr2L	1615129	1615141	13	RFeSP_1614160	>blimp-1	0.89	-	# CAAGTGAAAGTG	0.030245368	0.997896845	2930846159
chr2L	12007156	12007168	13	Rh5_12008378	>blimp-1	0.77	+	# CTAATGAAAATG	0.83555333	0.997896845	3684692309
chr2L	12007369	12007381	13	Rh5_12008378	>blimp-1	0.82	+	# GTCGTGAAGGTG	0.316875313	0.997896845	3481230754
chr2L	12007694	12007706	13	Rh5_12008378	>blimp-1	0.82	+	# GTCGTGCAAGTG	0.316875313	0.997896845	2811923082
chr2L	10329090	10329102	13	RnrL_10327943	>blimp-1	0.79	+	# ATAATGAAAGTT	0.572058087	0.997896845	2046153882
chr2L	17411211	17411223	13	Rpb11_17410406	>blimp-1	0.82	-	# GTACTGCAAGTG	0.316875313	0.997896845	3280615356
chr2L	8043861	8043873	13	RpL36A_8042859	>blimp-1	0.76	+	# GTAGTTAAAGCC	0.904056084	0.997896845	3110153897
chr2L	8044066	8044078	13	RpL36A_8042859	>blimp-1	0.77	-	# GGAGTGTAAGTT	0.83555333	0.997896845	3138692291
chr2L	19051264	19051276	13	Rpn3_19051929	>blimp-1	0.81	+	# AAAGTGAAACTG	0.374862293	0.997896845	2060615413
chr2L	4999596	4999608	13	Rtnl1_4999502	>blimp-1	0.79	-	# ATATGGAAAGTG	0.572058087	0.997896845	2095692332
chr2L	5000338	5000350	13	Rtnl1_4999502	>blimp-1	0.75	-	# GTTGTCAAAGTC	0.942814221	0.997896845	2666461523
chr2L	4997805	4997817	13	Rtnl1_4997381	>blimp-1	0.8	-	# GCATTGAAAGTA	0.450375563	0.997896845	2311230792
chr2L	11364563	11364575	13	salr_11365289	>blimp-1	0.75	+	# GGAGTGACAATG	0.942814221	0.997896845	2488769208
chr2L	11364762	11364774	13	salr_11365289	>blimp-1	0.8	-	# TGAGCGAAAGTG	0.450375563	0.997896845	2218076937
chr2L	106329	106341	13	Sam-S_108089	>blimp-1	0.79	+	# ACAGTGAGAGTG	0.572058087	0.997896845	2979692292
chr2L	19702401	19702413	13	scw_19700968	>blimp-1	0.77	+	# TTATTGAAATTG	0.83555333	0.997896845	3717999917
chr2L	19701652	19701664	13	scw_19700968	>blimp-1	0.84	-	# GTGGTTAAAGTG	0.236154231	0.997896845	3721923066
chr2L	19701663	19701675	13	scw_19700968	>blimp-1	0.77	-	# GCAATGTAAGTG	0.83555333	0.997896845	4251307682
chr2L	7063314	7063326	13	Sem1_7063986	>blimp-1	0.76	-	# GTAGTAAAAATA	0.904056084	0.997896845	2140846164
chr2L	7062678	7062690	13	Sem1_7063986	>blimp-1	0.78	-	# CTAGAAAAAGTG	0.735302954	0.997896845	2731769305
chr2L	7062655	7062667	13	Sem1_7063986	>blimp-1	0.77	-	# ATAGAGGAAGTG	0.83555333	0.997896845	307269233
chr2L	11756264	11756276	13	Sfp33A1_11754502	>blimp-1	0.83	-	# GTAGTGACAGTT	0.276815223	0.997896845	3303692323
chr2L	11836317	11836329	13	Sfp33A2_11837713	>blimp-1	0.76	+	# GTCGAAAAAGTG	0.904056084	0.997896845	233223077
chr2L	11839071	11839083	13	Sfp33A3_11839912	>blimp-1	0.78	+	# TTAGCAAAAGTG	0.735302954	0.997896845	2701461528
chr2L	11835382	11835394	13	Sfp33A4_11837243	>blimp-1	0.77	-	# GCCGTGAAAATG	0.83555333	0.997896845	2411230798
chr2L	15203358	15203370	13	Sfp35C_15202092	>blimp-1	0.91	+	# GTAGTGAAAATG	0.02203305	0.997896845	3567615362
chr2L	3719915	3719927	13	Shaw_3721336	>blimp-1	0.77	-	# ATAATGAAATTG	0.83555333	0.997896845	2291538454
chr2L	19825204	19825216	13	sick_19826474	>blimp-1	0.75	+	# AAAGCAAAAGTG	0.942814221	0.997896845	2330999964
chr2L	19825314	19825326	13	sick_19826474	>blimp-1	0.81	+	# AAACTGAAAGTG	0.374862293	0.997896845	230423079
chr2L	19825833	19825845	13	sick_19826474	>blimp-1	0.78	-	# ATACTGAAAGTA	0.735302954	0.997896845	2404999976
chr2L	19825145	19825157	13	sick_19826474	>blimp-1	0.79	-	# GCAGTCAAAGTT	0.572058087	0.997896845	2735615409
chr2L	19848612	19848624	13	sick_19849989	>blimp-1	0.75	+	# GTAGACGAAGTG	0.942814221	0.997896845	2146538456
chr2L	19918012	19918024	13	sick_19918161	>blimp-1	0.77	-	# GTGTTGAAAGTA	0.83555333	0.997896845	294746153
chr2L	6965211	6965223	13	sip2_6963676	>blimp-1	0.76	+	# CTGGTGGAAGTG	0.904056084	0.997896845	2376538428
chr2L	6965100	6965112	13	sip2_6963676	>blimp-1	0.77	+	# ATAGTTGAAGTG	0.83555333	0.997896845	3357307699
chr2L	13223649	13223661	13	Ski6_13222429	>blimp-1	0.77	-	# ATTGTGAAAGCG	0.83555333	0.997896845	2354076946
chr2L	2761113	2761125	13	Snapin_2759677	>blimp-1	0.83	+	# GTAGTCGAAGTG	0.276815223	0.997896845	3281999932
chr2L	21681200	21681212	13	snmRNA:254_21680700	>blimp-1	0.76	+	# GGAGTGCAAGGG	0.904056084	0.997896845	3844230786
chr2L	21681157	21681169	13	snmRNA:254_21680700	>blimp-1	0.78	-	# GAAGTCAACGTG	0.735302954	0.997896845	4857538526
chr2L	233382	233394	13	snoRNA:kis-a_232253	>blimp-1	0.77	+	# GAAGTGAACTTG	0.83555333	0.997896845	2520538486
chr2L	233224	233236	13	snoRNA:kis-a_232253	>blimp-1	0.78	-	# GAAGTGAAACAG	0.735302954	0.997896845	2258307731
chr2L	16530286	16530298	13	snoRNA:Me28S-C1237_16528922	>blimp-1	0.79	+	# CGAGTGAAAGCG	0.572058087	0.997896845	2735769189
chr2L	6744794	6744806	13	snoRNA:Me28S-G2743_6745000	>blimp-1	0.76	+	# GTAGACAAATTG	0.904056084	0.997896845	2036307678
chr2L	6744786	6744798	13	snoRNA:Me28S-G2743_6745000	>blimp-1	0.76	-	# CTACTGCAAGTG	0.904056084	0.997896845	2544769199
chr2L	20419149	20419161	13	snoRNA:Psi18S-525e_20419456	>blimp-1	0.86	+	# GGAGTTAAAGTG	0.119479219	0.997896845	2011615398
chr2L	20419457	20419469	13	snoRNA:Psi18S-525f_20419774	>blimp-1	0.85	+	# GGAGTCAAAGTG	0.170255383	0.997896845	256269231
chr2L	20419775	20419787	13	snoRNA:Psi18S-525g_20419932	>blimp-1	0.78	+	# GGAGGTAAAGTG	0.735302954	0.997896845	2469692274
chr2L	20421307	20421319	13	snoRNA:Psi18S-525i_20421617	>blimp-1	0.85	+	# GGAGTCAAAGTG	0.170255383	0.997896845	2897384693
chr2L	20421619	20421631	13	snoRNA:Psi18S-525j_20421928	>blimp-1	0.86	+	# GGAGTTAAAGTG	0.119479219	0.997896845	3224153748
chr2L	5187555	5187567	13	snoRNA:Psi28S-2263_5187778	>blimp-1	0.77	-	# GTGTAGAAAGTG	0.83555333	0.997896845	2037769263
chr2L	13214530	13214542	13	snRNA:U2:34ABb_13215839	>blimp-1	0.78	+	# GCAGTGACAGTT	0.735302954	0.997896845	2324307689
chr2L	13246416	13246428	13	snRNA:U2:34ABc_13244561	>blimp-1	0.79	-	# GAAATAAAAGTG	0.572058087	0.997896845	3558846144
chr2L	1431819	1431831	13	snRNA:U3:22A_1432711	>blimp-1	0.84	-	# TTTGTGAAAGTG	0.236154231	0.997896845	329346147
chr2L	19809064	19809076	13	snRNA:U4:38AB_19810734	>blimp-1	0.75	+	# GTCGCGAACGTG	0.942814221	0.997896845	2052846167
chr2L	19809078	19809090	13	snRNA:U4:38AB_19810734	>blimp-1	0.77	+	# TTAGTTAAAATG	0.83555333	0.997896845	223523079
chr2L	6973493	6973505	13	snRNP-U1-70K_6971737	>blimp-1	0.78	+	# AGAGTGATAGTG	0.735302954	0.997896845	4400846133
chr2L	6973487	6973499	13	snRNP-U1-70K_6971737	>blimp-1	0.76	+	# ATAGTGATAGCG	0.904056084	0.997896845	3987384549
chr2L	3448567	3448579	13	Snx1_3449683	>blimp-1	0.77	+	# GGAGTGAAATTA	0.83555333	0.997896845	2218461554
chr2L	8221972	8221984	13	Snx6_8220741	>blimp-1	0.82	-	# AAATTGAAAGTG	0.316875313	0.997896845	2769769187
chr2L	11612158	11612170	13	spag4_11611772	>blimp-1	0.79	+	# GCATTTAAAGTG	0.572058087	0.997896845	2944923117
chr2L	3530944	3530956	13	Spindly_3530317	>blimp-1	0.79	+	# GGATTGAAAGTT	0.572058087	0.997896845	3047999992
chr2L	3531649	3531661	13	Spindly_3530317	>blimp-1	0.81	-	# CAACTGAAAGTG	0.374862293	0.997896845	2698461448
chr2L	20340575	20340587	13	spir_20341851	>blimp-1	0.77	-	# GCAGTGAAAAAG	0.83555333	0.997896845	2790000015
chr2L	7880587	7880599	13	spz3_7879552	>blimp-1	0.79	-	# ATATTTAAAGTG	0.572058087	0.997896845	3720846121
chr2L	9912234	9912246	13	Srp54_9912911	>blimp-1	0.76	-	# ATAGTGACAGCG	0.904056084	0.997896845	3398692321
chr2L	21758971	21758983	13	step_21757466	>blimp-1	0.78	+	# GCAGTGAAATTC	0.735302954	0.997896845	2841230688
chr2L	17592127	17592139	13	Sytalpha_17592260	>blimp-1	0.82	-	# AAAGTGAAAGTA	0.316875313	0.997896845	3005769225
chr2L	9175332	9175344	13	tai_9176358	>blimp-1	0.78	+	# CTATTGAAATTG	0.735302954	0.997896845	3487692393
chr2L	1151372	1151384	13	Tfb4_1150677	>blimp-1	0.79	-	# GAGGTCAAAGTG	0.572058087	0.997896845	3806461553
chr2L	22018857	22018869	13	tio_22019208	>blimp-1	0.77	-	# TTATTGAAATTG	0.83555333	0.997896845	3851461631
chr2L	5271968	5271980	13	tkv_5271384	>blimp-1	0.76	+	# GTATTTAAATTG	0.904056084	0.997896845	3238692389
chr2L	3113304	3113316	13	toc_3112336	>blimp-1	0.81	+	# CAAGTGAAAGTA	0.374862293	0.997896845	244592309
chr2L	3095913	3095925	13	toc_3094695	>blimp-1	0.78	-	# GGTGCGAAAGTG	0.735302954	0.997896845	2163384648
chr2L	19497879	19497891	13	Top3alpha_19498168	>blimp-1	0.78	+	# GCAATGAAAGTC	0.735302954	0.997896845	2726384679
chr2L	19913872	19913884	13	TotF_19912377	>blimp-1	0.77	+	# CTAATGAAAATG	0.83555333	0.997896845	3449461588
chr2L	8071391	8071403	13	Trf_8072895	>blimp-1	0.75	-	# GTAGTGAAAAAT	0.942814221	0.997896845	2535230751
chr2L	8684026	8684038	13	tRNA:CR31888_8683877	>blimp-1	0.75	-	# GTAGGGAATGTC	0.942814221	0.997896845	2001692317
chr2L	8677249	8677261	13	tRNA:CR31889_8679116	>blimp-1	0.75	+	# GTAGGGAAACAG	0.942814221	0.997896845	3041307672
chr2L	8483665	8483677	13	tRNA:CR31892_8482155	>blimp-1	0.76	+	# GAAGTGGATGTG	0.904056084	0.997896845	2605384542
chr2L	1964691	1964703	13	tRNA:CR31942_1965426	>blimp-1	0.81	-	# CCATTGAAAGTG	0.374862293	0.997896845	2367384629
chr2L	1938843	1938855	13	tRNA:G3:22BCa_1938159	>blimp-1	0.78	+	# TTAGTCAAAGTA	0.735302954	0.997896845	2385923046
chr2L	2031126	2031138	13	tRNA:G3:22BCb_2031692	>blimp-1	0.78	+	# GCAGTGAGAGTT	0.735302954	0.997896845	2114000003
chr2L	2030975	2030987	13	tRNA:G3:22BCb_2031692	>blimp-1	0.8	-	# GAAAAGAAAGTG	0.450375563	0.997896845	2208230821
chr2L	14520583	14520595	13	tRNA:G3:35Bc_14518691	>blimp-1	0.79	+	# CCAGTGGAAGTG	0.572058087	0.997896845	2682692354
chr2L	14531868	14531880	13	tRNA:G3:35Bd_14530616	>blimp-1	0.78	+	# GCAGTAAAATTG	0.735302954	0.997896845	2521692336
chr2L	14597918	14597930	13	tRNA:P:35Ba_14598859	>blimp-1	0.78	+	# GAAGTGAAAATC	0.735302954	0.997896845	2172153858
chr2L	14597958	14597970	13	tRNA:P:35Ba_14598859	>blimp-1	0.77	-	# TTAGTGAAAATT	0.83555333	0.997896845	2604153878
chr2L	14494586	14494598	13	tRNA:P:35Bd_14495878	>blimp-1	0.76	-	# CTCGTGAAATTG	0.904056084	0.997896845	2088153831
chr2L	3167828	3167840	13	tRNA:S7:23Eb_3169582	>blimp-1	0.79	-	# GGAGGGAAAGTT	0.572058087	0.997896845	2112230794
chr2L	9612481	9612493	13	Trx-2_9613414	>blimp-1	0.82	-	# GTGGTGCAAGTG	0.316875313	0.997896845	2391769225
chr2L	6710020	6710032	13	Tsp_6709086	>blimp-1	0.77	-	# GCAGTACAAGTG	0.83555333	0.997896845	3323230782
chr2L	6710670	6710682	13	Tsp_6709086	>blimp-1	0.85	-	# GTAACGAAAGTG	0.170255383	0.997896845	2793615405
chr2L	6711070	6711082	13	Tsp_6709086	>blimp-1	0.77	-	# GTAGTTAAAGGT	0.83555333	0.997896845	2032615398
chr2L	6691009	6691021	13	Tsp_6689393	>blimp-1	0.75	-	# GTAGCGAACATG	0.942814221	0.997896845	2534230789
chr2L	6709075	6709087	13	Tsp_6708602	>blimp-1	0.78	-	# GAACTGAAACTG	0.735302954	0.997896845	2067153829
chr2L	8932772	8932784	13	Tsp29Fa_8933964	>blimp-1	0.75	+	# GTAGTTGAAGTA	0.942814221	0.997896845	2988538421
chr2L	19046480	19046492	13	Ttc19_19045148	>blimp-1	0.88	-	# GAAGCGAAAGTG	0.041161743	0.997896845	2472923119
chr2L	6740293	6740305	13	TTLL3A_6740188	>blimp-1	0.77	+	# GAAGTGAACTTG	0.83555333	0.997896845	2986153924
chr2L	6731142	6731154	13	TTLL3B_6732866	>blimp-1	0.76	+	# ATAGTGTAATTG	0.904056084	0.997896845	2995384634
chr2L	6731543	6731555	13	TTLL3B_6732866	>blimp-1	0.75	+	# GTATTAAATGTG	0.942814221	0.997896845	2807769223
chr2L	4283775	4283787	13	tutl_4284250	>blimp-1	0.75	+	# GTTGCGCAAGTG	0.942814221	0.997896845	2049923099
chr2L	7861898	7861910	13	TwdlE_7860839	>blimp-1	0.82	+	# AAATTGAAAGTG	0.316875313	0.997896845	3928692433
chr2L	15276918	15276930	13	UK114_15275091	>blimp-1	0.75	+	# AAAGGGAAAGTT	0.942814221	0.997896845	2605538524
chr2L	15275465	15275477	13	UK114_15275091	>blimp-1	0.78	+	# CTAGAGAAAGCG	0.735302954	0.997896845	2305153854
chr2L	475460	475472	13	ush_476220	>blimp-1	0.81	+	# AAAGTGAAATTG	0.374862293	0.997896845	3024384666
chr2L	489595	489607	13	ush_490835	>blimp-1	0.75	+	# GTAATGAACGTT	0.942814221	0.997896845	2059230704
chr2L	523689	523701	13	ush_523736	>blimp-1	0.76	-	# GTAATGAAATTT	0.904056084	0.997896845	3964000042
chr2L	13286019	13286031	13	Uvrag_13286777	>blimp-1	0.78	+	# GCATTGAAAGAG	0.735302954	0.997896845	3516846244
chr2L	3043673	3043685	13	v(2)k05816_3043947	>blimp-1	0.76	-	# TTAGTCCAAGTG	0.904056084	0.997896845	2606153837
chr2L	20794983	20794995	13	vari_20794146	>blimp-1	0.87	+	# GCAGTGAAAGTA	0.067100651	0.997896845	328953853
chr2L	2398334	2398346	13	VGlut_2400295	>blimp-1	0.78	+	# GCAATGAAATTG	0.735302954	0.997896845	3228846156
chr2L	2399380	2399392	13	VGlut_2400295	>blimp-1	0.78	+	# CTACTTAAAGTG	0.735302954	0.997896845	2233153859
chr2L	2400294	2400306	13	VGlut_2400751	>blimp-1	0.79	-	# GAAGTGAAACTA	0.572058087	0.997896845	3656769257
chr2L	13004949	13004961	13	Vha68-1_13004107	>blimp-1	0.77	+	# ATCGTGAAAATG	0.83555333	0.997896845	4330846215
chr2L	12978606	12978618	13	Vha68-3_12978786	>blimp-1	0.81	+	# TAATTGAAAGTG	0.374862293	0.997896845	2553615373
chr2L	12405570	12405582	13	vir-1_12404480	>blimp-1	0.79	+	# ATATTGAAAGTT	0.572058087	0.997896845	3741230836
chr2L	5030098	5030110	13	vkg_5028191	>blimp-1	0.79	-	# GAAATTAAAGTG	0.572058087	0.997896845	2567615445
chr2L	5027688	5027700	13	vkg_5027445	>blimp-1	0.77	+	# GGCGTCAAAGTG	0.83555333	0.997896845	228269235
chr2L	5961507	5961519	13	Vm26Aa_5960340	>blimp-1	0.89	+	# CAAGTGAAAGTG	0.030245368	0.997896845	2333
chr2L	5305582	5305594	13	vri_5305650	>blimp-1	0.87	-	# GCAGTAAAAGTG	0.067100651	0.997896845	2216923076
chr2L	14261416	14261428	13	wb_14263027	>blimp-1	0.76	+	# CTCGTGAAACTG	0.904056084	0.997896845	272469228
chr2L	15769312	15769324	13	wek_15768349	>blimp-1	0.78	+	# GAAGTCAAAGAG	0.735302954	0.997896845	2018153808
chr2L	7306244	7306256	13	wg_7307159	>blimp-1	0.75	+	# TTAGTGGAAGCG	0.942814221	0.997896845	2708461505
chr2L	7362642	7362654	13	Wnt10_7363379	>blimp-1	0.81	-	# AAAGTGAAACTG	0.374862293	0.997896845	3520153871
chr2L	15264239	15264251	13	yuri_15262802	>blimp-1	0.78	+	# GAAGTGAACGTT	0.735302954	0.997896845	242892311
chr2L	94314	94326	13	Zir_94739	>blimp-1	0.78	+	# TGGGTGAAAGTG	0.735302954	0.997896845	2842615366
chr2L	15248951	15248963	13	ZnT35C_15247714	>blimp-1	0.77	-	# TTCGTGAAAGTT	0.83555333	0.997896845	2163076886
chr2R	12036269	12036281	13	128up_12037298	>blimp-1	0.78	-	# GCATTGAAAATG	0.735302954	0.997896845	2471923078
chr2R	12035803	12035815	13	128up_12037298	>blimp-1	0.76	-	# GTAGCCCAAGTG	0.904056084	0.997896845	2084769289
chr2R	20109983	20109995	13	18w_20111511	>blimp-1	0.76	+	# GTATTCAAACTG	0.904056084	0.997896845	2905999986
chr2R	19767168	19767180	13	5SrRNA:CR33353_19766278	>blimp-1	0.76	+	# GTAGTTAAATTT	0.904056084	0.997896845	2718615376
chr2R	19766943	19766955	13	5SrRNA:CR33353_19766278	>blimp-1	0.78	-	# GAAGTCAAATTG	0.735302954	0.997896845	3435769237
chr2R	12876262	12876274	13	Aats-asp_12877004	>blimp-1	0.83	+	# GTACTGAAAATG	0.276815223	0.997896845	2800076953
chr2R	12875733	12875745	13	Aats-asp_12877004	>blimp-1	0.79	-	# GCTGCGAAAGTG	0.572058087	0.997896845	2254230746
chr2R	12880355	12880367	13	Aats-asp_12880432	>blimp-1	0.76	+	# GTATTAAAAGGG	0.904056084	0.997896845	2985692336
chr2R	13967378	13967390	13	Aats-phe_13968308	>blimp-1	0.77	-	# CTTGTTAAAGTG	0.83555333	0.997896845	2974384601
chr2R	24784489	24784501	13	Aats-tyr-m_24783500	>blimp-1	0.78	+	# GTAGCCAAAGTT	0.735302954	0.997896845	3088692388
chr2R	7987318	7987330	13	ACC_7987237	>blimp-1	0.77	+	# ATATTGATAGTG	0.83555333	0.997896845	2086923058
chr2R	7990528	7990540	13	ACC_7989714	>blimp-1	0.79	+	# TAAGTGGAAGTG	0.572058087	0.997896845	3106000018
chr2R	7990141	7990153	13	ACC_7989714	>blimp-1	0.78	-	# GCAGGGCAAGTG	0.735302954	0.997896845	292753848
chr2R	21384786	21384798	13	Acox57D-p_21386309	>blimp-1	0.78	-	# GAAGTGATAGTT	0.735302954	0.997896845	2653153883
chr2R	17131601	17131613	13	Acp54A1_17133445	>blimp-1	0.78	+	# ATTGTGAAAGTA	0.735302954	0.997896845	2766230812
chr2R	8664336	8664348	13	Acsl_8666171	>blimp-1	0.75	-	# CTAGTGCTAGTG	0.942814221	0.997896845	2496384639
chr2R	6660860	6660872	13	Adf1_6662270	>blimp-1	0.83	+	# GTAGTAAACGTG	0.276815223	0.997896845	2698307715
chr2R	13956306	13956318	13	AGO1_13955680	>blimp-1	0.77	-	# TTGGTGAAAGTT	0.83555333	0.997896845	2297846126
chr2R	13960069	13960081	13	AGO1_13958089	>blimp-1	0.8	+	# GAAGACAAAGTG	0.450375563	0.997896845	2539076942
chr2R	12570752	12570764	13	Ak6_12569847	>blimp-1	0.78	-	# GAAATGAAGGTG	0.735302954	0.997896845	2770307708
chr2R	9137836	9137848	13	alc_9137370	>blimp-1	0.76	-	# GTAGAAAAATTG	0.904056084	0.997896845	2680307644
chr2R	7476496	7476508	13	Aldh-III_7474659	>blimp-1	0.81	+	# AAAGTGAAACTG	0.374862293	0.997896845	2220615426
chr2R	16641605	16641617	13	Alk_16640011	>blimp-1	0.89	-	# AAAGTGAAAGTG	0.030245368	0.997896845	3608076792
chr2R	23956288	23956300	13	alpha-catenin-related_23957842	>blimp-1	0.78	+	# GCAGTGACAGTT	0.735302954	0.997896845	2139615395
chr2R	23956522	23956534	13	alpha-catenin-related_23957842	>blimp-1	0.76	-	# GTGGACAAAGTG	0.904056084	0.997896845	2982307732
chr2R	17121405	17121417	13	Amy-p_17120303	>blimp-1	0.75	-	# GTGGAGAAATTG	0.942814221	0.997896845	23015385
chr2R	16654567	16654579	13	Amyrel_16652699	>blimp-1	0.75	-	# GTAGAAAATGTG	0.942814221	0.997896845	2365384627
chr2R	8901025	8901037	13	ana2_8900211	>blimp-1	0.75	-	# GTTGGGAAAGGG	0.942814221	0.997896845	3041461488
chr2R	9043996	9044008	13	Ance-4_9042142	>blimp-1	0.75	-	# GTGGTGAAGGTT	0.942814221	0.997896845	4104999979
chr2R	24892957	24892969	13	Ance-5_24891023	>blimp-1	0.84	-	# GTAATAAAAGTG	0.236154231	0.997896845	352484626
chr2R	5709434	5709446	13	ap_5709292	>blimp-1	0.77	+	# TTTGCGAAAGTG	0.83555333	0.997896845	2275230781
chr2R	14959735	14959747	13	aPKC_14958456	>blimp-1	0.77	+	# GTATTAAAAGTA	0.83555333	0.997896845	283592314
chr2R	13216174	13216186	13	AQP_13214496	>blimp-1	0.76	-	# GCTGTGAACGTG	0.904056084	0.997896845	2057461544
chr2R	15321978	15321990	13	Arf51F_15322501	>blimp-1	0.78	-	# CGGGTGAAAGTG	0.735302954	0.997896845	3436000029
chr2R	15321850	15321862	13	Arf51F_15322501	>blimp-1	0.77	-	# GTGGCGAAAGTT	0.83555333	0.997896845	3012769256
chr2R	19443169	19443181	13	Arl6_19444179	>blimp-1	0.78	+	# TCAGTGAATGTG	0.735302954	0.997896845	3814615419
chr2R	16773317	16773329	13	Arp53D_16774246	>blimp-1	0.76	-	# GCAGTGGAAGAG	0.904056084	0.997896845	2092692336
chr2R	16772946	16772958	13	Arp53D_16774246	>blimp-1	0.75	-	# GTAGTCTAAGTT	0.942814221	0.997896845	2134999993
chr2R	21252889	21252901	13	ASPP_21251150	>blimp-1	0.78	+	# GCTGTAAAAGTG	0.735302954	0.997896845	2186461582
chr2R	14502997	14503009	13	Asx_14504227	>blimp-1	0.77	+	# GAAGTGAGAGAG	0.83555333	0.997896845	2826615404
chr2R	20259374	20259386	13	Ate1_20257390	>blimp-1	0.77	+	# GCAGTGAAACAG	0.83555333	0.997896845	3501846124
chr2R	20257843	20257855	13	Ate1_20257390	>blimp-1	0.86	-	# TTAGTGAAAGTT	0.119479219	0.997896845	2771769229
chr2R	24869134	24869146	13	Atf-2_24870108	>blimp-1	0.86	+	# GCAGTGAAAGAG	0.119479219	0.997896845	3324538451
chr2R	7830565	7830577	13	Atg10_7832171	>blimp-1	0.79	+	# ATACGGAAAGTG	0.572058087	0.997896845	213607694
chr2R	7830936	7830948	13	Atg10_7832171	>blimp-1	0.76	+	# GTAGCGGAAGTT	0.904056084	0.997896845	323815386
chr2R	16000866	16000878	13	ATPCL_16000287	>blimp-1	0.86	-	# GCGGTGAAAGTG	0.119479219	0.997896845	2466230704
chr2R	14751462	14751474	13	ave_14752521	>blimp-1	0.76	-	# CTGGTGGAAGTG	0.904056084	0.997896845	3214076863
chr2R	13495695	13495707	13	bbc_13494862	>blimp-1	0.75	+	# GTAATGAGAGTT	0.942814221	0.997896845	2742923067
chr2R	13496237	13496249	13	bbc_13494862	>blimp-1	0.76	-	# ATAGTGAATTTG	0.904056084	0.997896845	2410307696
chr2R	24304334	24304346	13	betaTub60D_24305881	>blimp-1	0.79	+	# GCATTTAAAGTG	0.572058087	0.997896845	2300615393
chr2R	24304791	24304803	13	betaTub60D_24305881	>blimp-1	0.75	+	# TTTGTGGAAGTG	0.942814221	0.997896845	317253851
chr2R	20592497	20592509	13	bl_20593885	>blimp-1	0.76	-	# TTCCTGAAAGTG	0.904056084	0.997896845	3239615385
chr2R	14599722	14599734	13	Blos1_14601278	>blimp-1	0.75	+	# GTAATGACAGTA	0.942814221	0.997896845	3310230707
chr2R	14601016	14601028	13	Blos1_14601278	>blimp-1	0.91	-	# GTAGTGAAGGTG	0.02203305	0.997896845	2865538438
chr2R	14599991	14600003	13	Blos1_14601278	>blimp-1	0.83	-	# GTATTGAATGTG	0.276815223	0.997896845	2099846131
chr2R	22637461	22637473	13	bonsai_22637770	>blimp-1	0.84	+	# GTAGGGAAAGTC	0.236154231	0.997896845	3659538418
chr2R	19128951	19128963	13	botv_19129589	>blimp-1	0.81	+	# AAAGTGAAAATG	0.374862293	0.997896845	2042769175
chr2R	9502344	9502356	13	brp_9503765	>blimp-1	0.76	+	# GGACTGCAAGTG	0.904056084	0.997896845	4093230766
chr2R	24342323	24342335	13	bs_24343702	>blimp-1	0.77	+	# ATAGTTTAAGTG	0.83555333	0.997896845	3866692323
chr2R	9463016	9463028	13	Camta_9464228	>blimp-1	0.78	+	# GAGGTGAAATTG	0.735302954	0.997896845	2781923087
chr2R	10268464	10268476	13	CAP_10269016	>blimp-1	0.78	-	# GTATCGAAAGTT	0.735302954	0.997896845	2531461539
chr2R	10268290	10268302	13	CAP_10269016	>blimp-1	0.75	-	# GTAGTAGAAGTA	0.942814221	0.997896845	343000008
chr2R	10268284	10268296	13	CAP_10269016	>blimp-1	0.78	-	# GAAGTAGAAGTG	0.735302954	0.997896845	3261461596
chr2R	10301028	10301040	13	CAP_10301387	>blimp-1	0.83	-	# GTAGTAAAAATG	0.276815223	0.997896845	2688230712
chr2R	10301378	10301390	13	CAP_10303209	>blimp-1	0.81	-	# AAAGTGAAACTG	0.374862293	0.997896845	3159923104
chr2R	23937523	23937535	13	Ca-P60A_23935680	>blimp-1	0.76	+	# GCAGTGAGAATG	0.904056084	0.997896845	2356384655
chr2R	13132165	13132177	13	Cap-G_13133142	>blimp-1	0.77	-	# GATGTGAATGTG	0.83555333	0.997896845	2448923137
chr2R	16028875	16028887	13	casp_16028043	>blimp-1	0.78	-	# GCAGAGAAACTG	0.735302954	0.997896845	2350153905
chr2R	13487134	13487146	13	cbc_13485391	>blimp-1	0.79	-	# GCAGTAAAAGTA	0.572058087	0.997896845	24321538
chr2R	16972175	16972187	13	Cbp53E_16973927	>blimp-1	0.78	+	# ATATTGAAAATG	0.735302954	0.997896845	2201615402
chr2R	16972167	16972179	13	Cbp53E_16973927	>blimp-1	0.78	-	# ATATTGAAAATG	0.735302954	0.997896845	2988076907
chr2R	10070153	10070165	13	cdc2rk_10068702	>blimp-1	0.83	+	# GTAGGGAATGTG	0.276815223	0.997896845	3309538534
chr2R	10069767	10069779	13	cdc2rk_10068702	>blimp-1	0.8	+	# AGATTGAAAGTG	0.450375563	0.997896845	3750846221
chr2R	10068909	10068921	13	cdc2rk_10068702	>blimp-1	0.77	-	# CTTATGAAAGTG	0.83555333	0.997896845	3162230762
chr2R	10068915	10068927	13	cdc2rk_10068702	>blimp-1	0.81	-	# AAAGTGAAATTG	0.374862293	0.997896845	3805923058
chr2R	10069843	10069855	13	cdc2rk_10068702	>blimp-1	0.81	-	# ACAGTGAAAGTT	0.374862293	0.997896845	2635615376
chr2R	10069957	10069969	13	cdc2rk_10068702	>blimp-1	0.81	-	# AAGGTGAAAGTG	0.374862293	0.997896845	3404769327
chr2R	9442708	9442720	13	ced-6_9441566	>blimp-1	0.78	+	# GCAGTTAAAATG	0.735302954	0.997896845	2239538425
chr2R	19378981	19378993	13	CG10073_19380543	>blimp-1	0.76	+	# TTATTGTAAGTG	0.904056084	0.997896845	2349923125
chr2R	14389626	14389638	13	CG10104_14390696	>blimp-1	0.79	-	# GAATTGAAATTG	0.572058087	0.997896845	2738769233
chr2R	14643397	14643409	13	CG10139_14645270	>blimp-1	0.75	+	# GTAATTAAAATG	0.942814221	0.997896845	3699769222
chr2R	14832090	14832102	13	CG10205_14832832	>blimp-1	0.76	-	# GTAATGAAATTA	0.904056084	0.997896845	3322307685
chr2R	14831052	14831064	13	CG10205_14832832	>blimp-1	0.78	-	# TTATTTAAAGTG	0.735302954	0.997896845	3712307618
chr2R	14849151	14849163	13	CG10209_14848366	>blimp-1	0.76	+	# ATAGTGAAGATG	0.904056084	0.997896845	3169153791
chr2R	14912477	14912489	13	CG10249_14910869	>blimp-1	0.85	-	# ATTGTGAAAGTG	0.170255383	0.997896845	2436230802
chr2R	14914074	14914086	13	CG10249_14912219	>blimp-1	0.75	+	# GTAATTAAAATG	0.942814221	0.997896845	2244230728
chr2R	14913038	14913050	13	CG10249_14912219	>blimp-1	0.75	+	# GTAATTCAAGTG	0.942814221	0.997896845	2339
chr2R	21633222	21633234	13	CG10321_21634679	>blimp-1	0.77	-	# GAAGTGACAGAG	0.83555333	0.997896845	2534615357
chr2R	22428600	22428612	13	CG10344_22426977	>blimp-1	0.78	+	# ATTGTGAAAGTA	0.735302954	0.997896845	2087769232
chr2R	21576846	21576858	13	CG10440_21576035	>blimp-1	0.77	+	# ATAGTGAATGTA	0.83555333	0.997896845	3897384644
chr2R	21577709	21577721	13	CG10440_21576035	>blimp-1	0.75	-	# GTAATTAAATTG	0.942814221	0.997896845	374384616
chr2R	21572609	21572621	13	CG10440_21571454	>blimp-1	0.75	-	# GTAATTAAAATG	0.942814221	0.997896845	4046000004
chr2R	20276396	20276408	13	CG10444_20274499	>blimp-1	0.76	+	# GCAGTGGCAGTG	0.904056084	0.997896845	2296999962
chr2R	21291570	21291582	13	CG10505_21290343	>blimp-1	0.77	-	# GTAGACAAAGTC	0.83555333	0.997896845	2827692342
chr2R	20998622	20998634	13	CG10543_21000475	>blimp-1	0.76	-	# TTAATGAAATTG	0.904056084	0.997896845	3891307684
chr2R	19168277	19168289	13	CG10737_19170223	>blimp-1	0.78	-	# ATATTGAAAATG	0.735302954	0.997896845	2311307725
chr2R	19163054	19163066	13	CG10737_19164143	>blimp-1	0.86	+	# GAAGTGAAATTG	0.119479219	0.997896845	232915385
chr2R	13378802	13378814	13	CG10814_13377731	>blimp-1	0.77	+	# GAAGTGGAAATG	0.83555333	0.997896845	2484923114
chr2R	13379356	13379368	13	CG10814_13377731	>blimp-1	0.83	-	# GTAATGAAAATG	0.276815223	0.997896845	3608384701
chr2R	23970877	23970889	13	CG10904_23970073	>blimp-1	0.75	-	# GTGGAGAATGTG	0.942814221	0.997896845	2122153845
chr2R	18157925	18157937	13	CG10914_18158257	>blimp-1	0.76	-	# GTATTAAAATTG	0.904056084	0.997896845	2725615391
chr2R	18158739	18158751	13	CG10915_18160720	>blimp-1	0.76	-	# GTTCAGAAAGTG	0.904056084	0.997896845	2477692339
chr2R	18532069	18532081	13	CG10924_18532390	>blimp-1	0.85	+	# CTAATGAAAGTG	0.170255383	0.997896845	2764384577
chr2R	18525788	18525800	13	CG10924_18527430	>blimp-1	0.76	+	# GTACTCAAAGTC	0.904056084	0.997896845	2583153839
chr2R	17721914	17721926	13	CG10933_17723309	>blimp-1	0.8	-	# AGAGAGAAAGTG	0.450375563	0.997896845	2436076999
chr2R	17193573	17193585	13	CG10950_17195203	>blimp-1	1	+	# GTAGTGAAAGTG	0.000600901	0.997896845	228730767
chr2R	17194171	17194183	13	CG10950_17195203	>blimp-1	0.76	+	# GTAATGAAATTT	0.904056084	0.997896845	3391153785
chr2R	19661980	19661992	13	CG11018_19662436	>blimp-1	0.77	+	# TTAGTGAAAATT	0.83555333	0.997896845	2994000047
chr2R	19660999	19661011	13	CG11018_19662436	>blimp-1	0.77	-	# GTACCTAAAGTG	0.83555333	0.997896845	2029307663
chr2R	20144990	20145002	13	CG11041_20146118	>blimp-1	0.79	+	# GCAGCGAAATTG	0.572058087	0.997896845	2818538457
chr2R	20229901	20229913	13	CG11044_20231829	>blimp-1	0.75	+	# GTGGTTAAAATG	0.942814221	0.997896845	3116384653
chr2R	7174940	7174952	13	CG11060_7175886	>blimp-1	0.84	+	# GTATTGAAATTG	0.236154231	0.997896845	2974846134
chr2R	7174426	7174438	13	CG11060_7175886	>blimp-1	0.75	-	# GTGTTGACAGTG	0.942814221	0.997896845	2658076937
chr2R	20640099	20640111	13	CG11110_20641742	>blimp-1	0.78	+	# GAGATGAAAGTG	0.735302954	0.997896845	2086461608
chr2R	20641184	20641196	13	CG11110_20641742	>blimp-1	0.79	-	# ATGGCGAAAGTG	0.572058087	0.997896845	3691153835
chr2R	7464654	7464666	13	CG11141_7463139	>blimp-1	0.75	+	# GTACTGAACGTT	0.942814221	0.997896845	2042230751
chr2R	7464387	7464399	13	CG11141_7463139	>blimp-1	0.8	+	# GAAGGGAAAGTT	0.450375563	0.997896845	2630153779
chr2R	7463951	7463963	13	CG11141_7463139	>blimp-1	0.8	-	# GCAGGGAAAGTT	0.450375563	0.997896845	2821076887
chr2R	20657529	20657541	13	CG11159_20656609	>blimp-1	0.84	-	# GGAGTGGAAGTG	0.236154231	0.997896845	3353230784
chr2R	20624329	20624341	13	CG11180_20623429	>blimp-1	0.76	-	# ATAGTGAAGATG	0.904056084	0.997896845	2710846237
chr2R	19388888	19388900	13	CG11257_19390128	>blimp-1	0.78	-	# GAAATGAAAATG	0.735302954	0.997896845	2087999995
chr2R	22138105	22138117	13	CG11269_22138895	>blimp-1	0.75	-	# GTTGTGAAAATT	0.942814221	0.997896845	3126153818
chr2R	22209797	22209809	13	CG11291_22211371	>blimp-1	0.75	-	# GGAGTGAATCTG	0.942814221	0.997896845	2266230781
chr2R	24207685	24207697	13	CG11406_24206940	>blimp-1	0.75	-	# GTGTTGAAAATG	0.942814221	0.997896845	3321846118
chr2R	10467321	10467333	13	CG11777_10468616	>blimp-1	0.77	+	# ATAGTGAATGTT	0.83555333	0.997896845	39404615
chr2R	15199414	15199426	13	CG11807_15201253	>blimp-1	0.78	+	# GAAGTTGAAGTG	0.735302954	0.997896845	4646153964
chr2R	15201138	15201150	13	CG11807_15201253	>blimp-1	0.78	+	# GAACTGAAAATG	0.735302954	0.997896845	2138461505
chr2R	15199932	15199944	13	CG11807_15201253	>blimp-1	0.8	-	# GAAGGGAAAGTA	0.450375563	0.997896845	35145385
chr2R	10424866	10424878	13	CG11825_10423650	>blimp-1	0.75	+	# GTAGGGGAAGTC	0.942814221	0.997896845	2991384598
chr2R	10615729	10615741	13	CG11883_10617662	>blimp-1	0.79	+	# AGACTGAAAGTG	0.572058087	0.997896845	3237538429
chr2R	10617044	10617056	13	CG11883_10617662	>blimp-1	0.76	-	# GTGGTTAAAGTT	0.904056084	0.997896845	2948153803
chr2R	10025690	10025702	13	CG12128_10026839	>blimp-1	0.76	-	# ATTGTGCAAGTG	0.904056084	0.997896845	3363000099
chr2R	10031681	10031693	13	CG12129_10033304	>blimp-1	0.76	+	# GTTGTAAAAGTT	0.904056084	0.997896845	3270692268
chr2R	7917736	7917748	13	CG12159_7916478	>blimp-1	0.8	+	# GAATTTAAAGTG	0.450375563	0.997896845	2137923072
chr2R	18424633	18424645	13	CG12263_18426421	>blimp-1	0.76	-	# TTAGTAAACGTG	0.904056084	0.997896845	2566538451
chr2R	10724329	10724341	13	CG12309_10725270	>blimp-1	0.75	+	# GTGGTGATAGTT	0.942814221	0.997896845	3935999959
chr2R	10724907	10724919	13	CG12309_10725270	>blimp-1	0.75	+	# GTAGCGGAAGAG	0.942814221	0.997896845	4198846134
chr2R	10724970	10724982	13	CG12309_10725270	>blimp-1	0.85	+	# GTAGTCAAAGTT	0.170255383	0.997896845	5067769298
chr2R	10825277	10825289	13	CG12343_10823372	>blimp-1	0.78	+	# GAGGTGAAAGTC	0.735302954	0.997896845	3152692339
chr2R	10836871	10836883	13	CG12344_10835709	>blimp-1	0.77	+	# TTAATCAAAGTG	0.83555333	0.997896845	2485846179
chr2R	12760415	12760427	13	CG12374_12762113	>blimp-1	0.77	-	# GCAGTGATAGCG	0.83555333	0.997896845	2264307642
chr2R	8700914	8700926	13	CG12376_8701835	>blimp-1	0.76	+	# GTCGGGAAAGTC	0.904056084	0.997896845	2141230747
chr2R	20423076	20423088	13	CG12484_20424338	>blimp-1	0.75	+	# TTTGTGGAAGTG	0.942814221	0.997896845	2756307689
chr2R	20422506	20422518	13	CG12484_20424338	>blimp-1	0.92	-	# GTAATGAAAGTG	0.014922384	0.997896845	3753846187
chr2R	8059178	8059190	13	CG12769_8058551	>blimp-1	0.8	+	# CAAGTGAAAATG	0.450375563	0.997896845	3201769306
chr2R	8058918	8058930	13	CG12769_8058551	>blimp-1	0.76	+	# TTACTGAAAATG	0.904056084	0.997896845	2301384642
chr2R	23266506	23266518	13	CG12782_23265543	>blimp-1	0.76	+	# GTAGTTAAATTA	0.904056084	0.997896845	3581000053
chr2R	7075982	7075994	13	CG12831_7074152	>blimp-1	0.79	+	# GAAATCAAAGTG	0.572058087	0.997896845	3739384697
chr2R	24796881	24796893	13	CG12849_24797925	>blimp-1	0.79	-	# GATGGGAAAGTG	0.572058087	0.997896845	2841615348
chr2R	24795972	24795984	13	CG12849_24797925	>blimp-1	0.75	-	# GTAGGTAAGGTG	0.942814221	0.997896845	2365999996
chr2R	24947271	24947283	13	CG12851_24948645	>blimp-1	0.77	-	# ATAATGAAAATG	0.83555333	0.997896845	3103307636
chr2R	14932301	14932313	13	CG12853_14933515	>blimp-1	0.76	+	# TTGGTGAAACTG	0.904056084	0.997896845	234861541
chr2R	14590127	14590139	13	CG12869_14591203	>blimp-1	0.76	-	# GTAATGAAAATA	0.904056084	0.997896845	2709153849
chr2R	10438078	10438090	13	CG12895_10437382	>blimp-1	0.79	-	# CAAGTGCAAGTG	0.572058087	0.997896845	2515692275
chr2R	10265777	10265789	13	CG12910_10266071	>blimp-1	0.78	+	# ATAATAAAAGTG	0.735302954	0.997896845	2449230726
chr2R	10264051	10264063	13	CG12910_10265057	>blimp-1	0.79	+	# GAATTGAAAATG	0.572058087	0.997896845	2827538431
chr2R	10067338	10067350	13	CG12920_10069106	>blimp-1	0.79	+	# TGAGGGAAAGTG	0.572058087	0.997896845	3557923115
chr2R	15499074	15499086	13	CG12964_15497231	>blimp-1	0.85	+	# GCAGTGCAAGTG	0.170255383	0.997896845	2694615355
chr2R	15497418	15497430	13	CG12964_15497231	>blimp-1	0.8	-	# GCATCGAAAGTG	0.450375563	0.997896845	2473538434
chr2R	15497515	15497527	13	CG12964_15497231	>blimp-1	0.78	-	# GAAATGAAAGAG	0.735302954	0.997896845	2050153854
chr2R	14156134	14156146	13	CG13016_14157762	>blimp-1	0.79	-	# GAAATCAAAGTG	0.572058087	0.997896845	4229384585
chr2R	14157986	14157998	13	CG13018_14157488	>blimp-1	0.78	+	# GAAGGGAATGTG	0.735302954	0.997896845	2385230783
chr2R	12414058	12414070	13	CG13157_12416044	>blimp-1	0.87	+	# GAAATGAAAGTG	0.067100651	0.997896845	2074384623
chr2R	12415833	12415845	13	CG13157_12416044	>blimp-1	0.83	-	# GTGGTGAAAATG	0.276815223	0.997896845	2424538493
chr2R	12252222	12252234	13	CG13168_12253992	>blimp-1	0.77	-	# TTTGAGAAAGTG	0.83555333	0.997896845	23352308
chr2R	12162813	12162825	13	CG13177_12163675	>blimp-1	0.75	-	# GTGGTGAAAATT	0.942814221	0.997896845	2079769244
chr2R	12161717	12161729	13	CG13177_12163675	>blimp-1	0.79	-	# CTACCGAAAGTG	0.572058087	0.997896845	3690000011
chr2R	11913789	11913801	13	CG13183_11912779	>blimp-1	0.76	+	# CTTGTGAAAGGG	0.904056084	0.997896845	2328846161
chr2R	11939202	11939214	13	CG13188_11939557	>blimp-1	0.75	+	# GTAATTAAGGTG	0.942814221	0.997896845	2409076885
chr2R	11652985	11652997	13	CG13198_11654898	>blimp-1	0.76	+	# GTGGTGAAAGGA	0.904056084	0.997896845	3740461519
chr2R	11374686	11374698	13	CG13203_11375183	>blimp-1	0.8	-	# ATATCGAAAGTG	0.450375563	0.997896845	2628153895
chr2R	11366920	11366932	13	CG13204_11368286	>blimp-1	0.86	+	# GATGTGAAAGTG	0.119479219	0.997896845	2701923114
chr2R	11367046	11367058	13	CG13204_11368286	>blimp-1	0.77	+	# GAAGTGAAGCTG	0.83555333	0.997896845	2579923145
chr2R	11282793	11282805	13	CG13220_11284414	>blimp-1	0.75	+	# GTACTGGAAGTT	0.942814221	0.997896845	3328538444
chr2R	11255136	11255148	13	CG13223_11256507	>blimp-1	0.78	+	# GTATATAAAGTG	0.735302954	0.997896845	2867769212
chr2R	12923099	12923111	13	CG13319_12923904	>blimp-1	0.77	-	# ATATTGGAAGTG	0.83555333	0.997896845	2641307698
chr2R	13050482	13050494	13	CG13324_13049656	>blimp-1	0.78	+	# GAACTGAAACTG	0.735302954	0.997896845	3774384645
chr2R	13115890	13115902	13	CG13325_13116305	>blimp-1	0.75	-	# AAAGCGAAAGTT	0.942814221	0.997896845	3187692215
chr2R	13121271	13121283	13	CG13325_13123138	>blimp-1	0.78	+	# CTGGTGAAAGTT	0.735302954	0.997896845	238776923
chr2R	13121463	13121475	13	CG13325_13123138	>blimp-1	0.76	-	# GCAGTGACTGTG	0.904056084	0.997896845	2199615419
chr2R	13108984	13108996	13	CG13325_13110769	>blimp-1	0.79	+	# GAAGTGAAAGCC	0.572058087	0.997896845	2645923033
chr2R	13110124	13110136	13	CG13325_13110769	>blimp-1	0.78	-	# GAAATGAAATTG	0.735302954	0.997896845	3291538477
chr2R	13520020	13520032	13	CG13331_13521769	>blimp-1	0.77	-	# GGAGGGTAAGTG	0.83555333	0.997896845	263523078
chr2R	13524229	13524241	13	CG13332_13525377	>blimp-1	0.8	+	# GAAGTTAAAGTT	0.450375563	0.997896845	2140923056
chr2R	13524246	13524258	13	CG13332_13525377	>blimp-1	0.76	+	# CTAATGAATGTG	0.904056084	0.997896845	2020461524
chr2R	13664212	13664224	13	CG13337_13665114	>blimp-1	0.79	+	# GAAGTGAAAATT	0.572058087	0.997896845	3901230739
chr2R	20542339	20542351	13	CG13428_20540448	>blimp-1	0.79	+	# GAATTGAAACTG	0.572058087	0.997896845	3365692212
chr2R	20541833	20541845	13	CG13428_20540448	>blimp-1	0.79	+	# ATAGTAAAAGTT	0.572058087	0.997896845	4062307679
chr2R	20552741	20552753	13	CG13430_20552090	>blimp-1	0.76	+	# GTTTTGAAAGTT	0.904056084	0.997896845	2167384589
chr2R	20691862	20691874	13	CG13438_20692829	>blimp-1	0.89	+	# AAAGTGAAAGTG	0.030245368	0.997896845	2642307722
chr2R	20731023	20731035	13	CG13442_20730610	>blimp-1	0.82	-	# AAATTGAAAGTG	0.316875313	0.997896845	3740461533
chr2R	20732379	20732391	13	CG13442_20730610	>blimp-1	0.8	-	# AGAGTGAAAGTT	0.450375563	0.997896845	2201307687
chr2R	20773298	20773310	13	CG13443_20773687	>blimp-1	0.86	-	# GTAGCGAAAGTT	0.119479219	0.997896845	2368692316
chr2R	21831676	21831688	13	CG13492_21831409	>blimp-1	0.77	+	# GGTGTAAAAGTG	0.83555333	0.997896845	2032692305
chr2R	22061411	22061423	13	CG13501_22060710	>blimp-1	0.78	+	# GCAGTGCAAGTA	0.735302954	0.997896845	2888153828
chr2R	22382880	22382892	13	CG13506_22383134	>blimp-1	0.76	+	# GCAGTGACATTG	0.904056084	0.997896845	2430769212
chr2R	23183653	23183665	13	CG13539_23183977	>blimp-1	0.78	-	# GAAATGAAAATG	0.735302954	0.997896845	2098692268
chr2R	24080222	24080234	13	CG13564_24080925	>blimp-1	0.78	+	# GCATTGAAAATG	0.735302954	0.997896845	2264461513
chr2R	23948850	23948862	13	CG13565_23948616	>blimp-1	0.76	+	# ATGGTGCAAGTG	0.904056084	0.997896845	2870076922
chr2R	24269736	24269748	13	CG13577_24269179	>blimp-1	0.77	-	# GGAGGGAAATTG	0.83555333	0.997896845	21883077
chr2R	7615297	7615309	13	CG1358_7614535	>blimp-1	0.78	+	# GAAGTGGAAGTT	0.735302954	0.997896845	2691384652
chr2R	24531636	24531648	13	CG13585_24532112	>blimp-1	0.77	+	# GTAAGAAAAGTG	0.83555333	0.997896845	2110153855
chr2R	24638850	24638862	13	CG13594_24638588	>blimp-1	0.75	-	# GTAGTGAAATGC	0.942814221	0.997896845	2362307681
chr2R	9060155	9060167	13	CG13743_9059907	>blimp-1	0.75	-	# AAAGCGAAAGTT	0.942814221	0.997896845	299030776
chr2R	9016871	9016883	13	CG13747_9017815	>blimp-1	0.86	-	# CTAGTAAAAGTG	0.119479219	0.997896845	3312615321
chr2R	8938751	8938763	13	CG13748_8940415	>blimp-1	0.83	+	# GTAGTTCAAGTG	0.276815223	0.997896845	274869232
chr2R	20314885	20314897	13	CG13868_20313623	>blimp-1	0.75	-	# GTAATGAAATTC	0.942814221	0.997896845	2388923134
chr2R	9389629	9389641	13	CG13954_9388254	>blimp-1	0.76	+	# GCAGTGTAATTG	0.904056084	0.997896845	3474538519
chr2R	9389468	9389480	13	CG13954_9388254	>blimp-1	0.75	-	# AAATCGAAAGTG	0.942814221	0.997896845	222700001
chr2R	9424878	9424890	13	CG13955_9423688	>blimp-1	0.85	+	# CTGGTGAAAGTG	0.170255383	0.997896845	2001461561
chr2R	17457910	17457922	13	CG14478_17458816	>blimp-1	0.76	+	# GTAAAGAAAATG	0.904056084	0.997896845	3114692417
chr2R	17458347	17458359	13	CG14478_17458816	>blimp-1	0.79	-	# ATATTGAAAGTA	0.572058087	0.997896845	3671846041
chr2R	17562841	17562853	13	CG14480_17564340	>blimp-1	0.77	+	# GTAATAAAAGTT	0.83555333	0.997896845	2146538473
chr2R	17574118	17574130	13	CG14482_17572784	>blimp-1	0.78	+	# GCATTGAAAGAG	0.735302954	0.997896845	3401999973
chr2R	17573981	17573993	13	CG14482_17572784	>blimp-1	0.76	-	# ATTGTGAACGTG	0.904056084	0.997896845	3305615343
chr2R	17769445	17769457	13	CG14488_17767786	>blimp-1	0.83	-	# GTCGTGAAAGAG	0.276815223	0.997896845	2602461517
chr2R	18287635	18287647	13	CG14502_18289220	>blimp-1	0.77	+	# GTACTCAAAGTT	0.83555333	0.997896845	4320461634
chr2R	6082003	6082015	13	CG14590_6080572	>blimp-1	0.76	-	# GTTGTTAAAGTA	0.904056084	0.997896845	4833615454
chr2R	8588907	8588919	13	CG14752_8590497	>blimp-1	0.75	+	# AAAGCGAAAGTA	0.942814221	0.997896845	25773846
chr2R	8589971	8589983	13	CG14752_8590497	>blimp-1	0.8	-	# AAAGTGAACGTG	0.450375563	0.997896845	2653076918
chr2R	8258500	8258512	13	CG14759_8259841	>blimp-1	0.78	-	# ATAGTCAAAGTC	0.735302954	0.997896845	3568692331
chr2R	8253975	8253987	13	CG14760_8254223	>blimp-1	0.8	-	# AAAGTGCAAGTG	0.450375563	0.997896845	3597615444
chr2R	8015494	8015506	13	CG14762_8013755	>blimp-1	0.76	+	# GTCTTCAAAGTG	0.904056084	0.997896845	303515393
chr2R	8724443	8724455	13	CG14767_8723839	>blimp-1	0.77	+	# GCAGTTACAGTG	0.83555333	0.997896845	2166076901
chr2R	18391729	18391741	13	CG15068_18390629	>blimp-1	0.75	+	# GTAATTAAATTG	0.942814221	0.997896845	418284617
chr2R	18705151	18705163	13	CG15073_18705977	>blimp-1	0.75	+	# TTAGTGAATTTG	0.942814221	0.997896845	2025076901
chr2R	18781732	18781744	13	CG15080_18783299	>blimp-1	0.8	+	# CAGGTGAAAGTG	0.450375563	0.997896845	2570923046
chr2R	18815810	18815822	13	CG15096_18815019	>blimp-1	0.89	+	# AAAGTGAAAGTG	0.030245368	0.997896845	261253848
chr2R	18813010	18813022	13	CG15096_18811460	>blimp-1	0.77	-	# TTAGTGAAATTA	0.83555333	0.997896845	242438458
chr2R	18974497	18974509	13	CG15107_18972537	>blimp-1	0.76	+	# GTGGATAAAGTG	0.904056084	0.997896845	3393384668
chr2R	19057742	19057754	13	CG15109_19059421	>blimp-1	0.78	+	# CTAATGAAAGTT	0.735302954	0.997896845	3361923053
chr2R	19656017	19656029	13	CG15125_19657573	>blimp-1	0.77	-	# GGAGCGGAAGTG	0.83555333	0.997896845	2417230803
chr2R	19682860	19682872	13	CG15127_19681391	>blimp-1	0.82	+	# GTGGTGCAAGTG	0.316875313	0.997896845	2107307687
chr2R	20863138	20863150	13	CG15227_20863781	>blimp-1	0.76	-	# GCAGTGTACGTG	0.904056084	0.997896845	2235615391
chr2R	20862186	20862198	13	CG15227_20863781	>blimp-1	0.78	-	# CTATTAAAAGTG	0.735302954	0.997896845	3303538469
chr2R	6601846	6601858	13	CG15233_6600978	>blimp-1	0.81	-	# CAATTGAAAGTG	0.374862293	0.997896845	2278538463
chr2R	17108622	17108634	13	CG15611_17108844	>blimp-1	0.75	+	# AAAGCAAAAGTG	0.942814221	0.997896845	3236538566
chr2R	16944568	16944580	13	CG15614_16945555	>blimp-1	0.79	-	# GCAGTTAAAGTC	0.572058087	0.997896845	201484618
chr2R	16797863	16797875	13	CG15615_16796407	>blimp-1	0.81	+	# AAAGTAAAAGTG	0.374862293	0.997896845	2520923092
chr2R	20975072	20975084	13	CG15649_20974017	>blimp-1	0.81	+	# AAAGTGAAAGTC	0.374862293	0.997896845	3299692374
chr2R	20974643	20974655	13	CG15649_20974017	>blimp-1	0.79	-	# GCAAAGAAAGTG	0.572058087	0.997896845	219392307
chr2R	20987758	20987770	13	CG15651_20986500	>blimp-1	0.84	-	# GTGGAGAAAGTG	0.236154231	0.997896845	2033230744
chr2R	21614278	21614290	13	CG15673_21613071	>blimp-1	0.77	+	# TTAGCGAATGTG	0.83555333	0.997896845	2029384586
chr2R	21670687	21670699	13	CG15676_21671700	>blimp-1	0.79	-	# GAAGTCAAAGCG	0.572058087	0.997896845	2574846114
chr2R	16364583	16364595	13	CG15711_16364307	>blimp-1	0.75	-	# AAAGCGAAAGTA	0.942814221	0.997896845	3137692378
chr2R	24431528	24431540	13	CG15873_24430699	>blimp-1	0.75	-	# GTAGCGCAAATG	0.942814221	0.997896845	250215384
chr2R	24431722	24431734	13	CG15873_24430699	>blimp-1	0.82	-	# AAAGTTAAAGTG	0.316875313	0.997896845	2379769208
chr2R	6666878	6666890	13	CG15908_6668150	>blimp-1	0.77	+	# GGAGTCAAAGCG	0.83555333	0.997896845	2035307731
chr2R	6667779	6667791	13	CG15908_6668150	>blimp-1	0.76	-	# GTAGTCAAAATT	0.904056084	0.997896845	3388076917
chr2R	16445586	16445598	13	CG15925_16445986	>blimp-1	0.75	+	# GTATTGAAAAAG	0.942814221	0.997896845	2242230787
chr2R	7541541	7541553	13	CG1598_7539696	>blimp-1	0.78	+	# TTATGGAAAGTG	0.735302954	0.997896845	2717230806
chr2R	7517154	7517166	13	CG1603_7516390	>blimp-1	0.75	-	# GGAGTGAATCTG	0.942814221	0.997896845	269338463
chr2R	9846125	9846137	13	CG1671_9848061	>blimp-1	0.78	-	# GCACTGAAATTG	0.735302954	0.997896845	2497615369
chr2R	19592611	19592623	13	CG16716_19593790	>blimp-1	0.75	-	# TTAATGATAGTG	0.942814221	0.997896845	3681461563
chr2R	20213293	20213305	13	CG16894_20212619	>blimp-1	0.76	-	# GAAGTGACTGTG	0.904056084	0.997896845	209499995
chr2R	13863135	13863147	13	CG16935_13861930	>blimp-1	0.75	+	# GTGGTGATAGTT	0.942814221	0.997896845	275300009
chr2R	13862637	13862649	13	CG16935_13861930	>blimp-1	0.75	+	# GTAGTGGAAGCA	0.942814221	0.997896845	2793692279
chr2R	12934259	12934271	13	CG17019_12934045	>blimp-1	0.81	+	# GTAGTGGATGTG	0.374862293	0.997896845	3905615366
chr2R	17153729	17153741	13	CG17290_17154589	>blimp-1	0.78	+	# GAAATGAAAATG	0.735302954	0.997896845	2449461508
chr2R	14412260	14412272	13	CG17385_14411572	>blimp-1	0.78	+	# GGAGCGAAAGCG	0.735302954	0.997896845	2252538432
chr2R	14412287	14412299	13	CG17385_14411572	>blimp-1	0.78	-	# CTAGAGAAACTG	0.735302954	0.997896845	2761615351
chr2R	14419361	14419373	13	CG17386_14420324	>blimp-1	0.78	-	# ATTGGGAAAGTG	0.735302954	0.997896845	2630384638
chr2R	23130938	23130950	13	CG3215_23130189	>blimp-1	0.75	-	# AAAGCCAAAGTG	0.942814221	0.997896845	2217846174
chr2R	23130944	23130956	13	CG3215_23130189	>blimp-1	0.81	-	# AAAGTGAAAGTC	0.374862293	0.997896845	273192311
chr2R	23131124	23131136	13	CG3215_23130189	>blimp-1	0.78	-	# GAAATGAAAATG	0.735302954	0.997896845	3674692402
chr2R	20992635	20992647	13	CG3216_20991171	>blimp-1	0.76	-	# GTAGCGAACGTT	0.904056084	0.997896845	2003769219
chr2R	22207292	22207304	13	CG3292_22205593	>blimp-1	0.76	-	# GTTGTTAAAGTT	0.904056084	0.997896845	2153384596
chr2R	21018219	21018231	13	CG3295_21017446	>blimp-1	0.77	+	# GTGGCGAAAGTA	0.83555333	0.997896845	2227307721
chr2R	16270879	16270891	13	CG33017_16272114	>blimp-1	0.78	+	# GAAATGTAAGTG	0.735302954	0.997896845	2100230759
chr2R	16271734	16271746	13	CG33017_16272114	>blimp-1	0.78	+	# GCAGTGAAAATT	0.735302954	0.997896845	3140999959
chr2R	18666751	18666763	13	CG33136_18665792	>blimp-1	0.75	+	# GTAGTCAAATAG	0.942814221	0.997896845	3530384632
chr2R	18666400	18666412	13	CG33136_18665792	>blimp-1	0.77	+	# GTAGTTAAAGGT	0.83555333	0.997896845	2773846159
chr2R	18666390	18666402	13	CG33136_18665792	>blimp-1	0.75	+	# GTAAAGGAAGTG	0.942814221	0.997896845	3401076959
chr2R	13174720	13174732	13	CG33137_13175395	>blimp-1	0.76	+	# TTAGTTATAGTG	0.904056084	0.997896845	2156230783
chr2R	11983551	11983563	13	CG33145_11982956	>blimp-1	0.79	-	# GAAGTTAAAGGG	0.572058087	0.997896845	3450384586
chr2R	13551188	13551200	13	CG33156_13550258	>blimp-1	0.82	-	# AAAGAGAAAGTG	0.316875313	0.997896845	2741153812
chr2R	21589188	21589200	13	CG33225_21590432	>blimp-1	0.78	+	# ATATTGAAAATG	0.735302954	0.997896845	2561538456
chr2R	19254410	19254422	13	CG33453_19253228	>blimp-1	0.81	+	# AAAGTGAAAATG	0.374862293	0.997896845	3414230824
chr2R	12637780	12637792	13	CG33671_12636141	>blimp-1	0.76	+	# CTAATGAAGGTG	0.904056084	0.997896845	3069846121
chr2R	12544229	12544241	13	CG33752_12545689	>blimp-1	0.77	-	# GCAGTTTAAGTG	0.83555333	0.997896845	2331999999
chr2R	24259577	24259589	13	CG3376_24261334	>blimp-1	0.78	+	# CTAAAGAAAGTG	0.735302954	0.997896845	3515153775
chr2R	24259583	24259595	13	CG3376_24261334	>blimp-1	0.82	+	# AAAGTGAAAGTT	0.316875313	0.997896845	3587307637
chr2R	24260028	24260040	13	CG3376_24261334	>blimp-1	0.75	-	# AAATCGAAAGTG	0.942814221	0.997896845	2886999956
chr2R	12992006	12992018	13	CG33798_12993897	>blimp-1	0.76	+	# GTACCGCAAGTG	0.904056084	0.997896845	2633230755
chr2R	25166924	25166936	13	CG34038_25167659	>blimp-1	0.79	+	# GCAATGAAAGTT	0.572058087	0.997896845	2272615343
chr2R	6717048	6717060	13	CG3409_6715892	>blimp-1	0.78	-	# GGAGCGAAAGGG	0.735302954	0.997896845	2607384587
chr2R	14365242	14365254	13	CG34184_14365656	>blimp-1	0.77	-	# GTGGCGAAAGTT	0.83555333	0.997896845	2633461549
chr2R	14364063	14364075	13	CG34184_14365656	>blimp-1	0.75	-	# GTCTTGAAAATG	0.942814221	0.997896845	4941000026
chr2R	16754312	16754324	13	CG34189_16754444	>blimp-1	0.76	+	# GTATTGGAAGTT	0.904056084	0.997896845	2319846103
chr2R	16948716	16948728	13	CG34190_16947554	>blimp-1	0.87	+	# GCAGGGAAAGTG	0.067100651	0.997896845	2368230771
chr2R	17509440	17509452	13	CG34193_17509926	>blimp-1	0.76	+	# GTAATGAAAGAA	0.904056084	0.997896845	3168076928
chr2R	17509772	17509784	13	CG34193_17509926	>blimp-1	0.75	+	# AAAGCAAAAGTG	0.942814221	0.997896845	2301846156
chr2R	17542219	17542231	13	CG34194_17544190	>blimp-1	0.76	+	# GCAGTGCAACTG	0.904056084	0.997896845	2064769218
chr2R	17732920	17732932	13	CG34195_17733238	>blimp-1	0.76	+	# GTATTTAAAATG	0.904056084	0.997896845	2204692322
chr2R	18109914	18109926	13	CG34196_18109985	>blimp-1	0.79	-	# GCACTGAAAGTT	0.572058087	0.997896845	2327538477
chr2R	20285796	20285808	13	CG34199_20287596	>blimp-1	0.76	+	# GTGTTTAAAGTG	0.904056084	0.997896845	2841230739
chr2R	6758096	6758108	13	CG3420_6757039	>blimp-1	0.75	-	# GTAGAGGAAGGG	0.942814221	0.997896845	2574461565
chr2R	22331500	22331512	13	CG34207_22329720	>blimp-1	0.79	+	# TCCGTGAAAGTG	0.572058087	0.997896845	2290615383
chr2R	24667851	24667863	13	CG34214_24666022	>blimp-1	0.86	+	# GAAGTGAAAGAG	0.119479219	0.997896845	230107696
chr2R	7706665	7706677	13	CG34216_7705095	>blimp-1	0.77	+	# GGAGTGGAAGTT	0.83555333	0.997896845	2336307674
chr2R	7705924	7705936	13	CG34216_7705095	>blimp-1	0.77	+	# GTACCGAAAGTC	0.83555333	0.997896845	2292769235
chr2R	8228994	8229006	13	CG34217_8228727	>blimp-1	0.77	+	# GGAGTGAAAATA	0.83555333	0.997896845	2789923088
chr2R	12166816	12166828	13	CG34232_12165812	>blimp-1	0.77	-	# GTACAAAAAGTG	0.83555333	0.997896845	2000615404
chr2R	12167412	12167424	13	CG34232_12165812	>blimp-1	0.76	-	# GTAGAGGAAGTA	0.904056084	0.997896845	274669224
chr2R	22039625	22039637	13	CG34370_22039431	>blimp-1	0.78	-	# TGAATGAAAGTG	0.735302954	0.997896845	2875461574
chr2R	23205420	23205432	13	CG34371_23203973	>blimp-1	0.76	+	# GTATTAAAATTG	0.904056084	0.997896845	3401923051
chr2R	18061003	18061015	13	CG34386_18062415	>blimp-1	0.78	+	# GATGTCAAAGTG	0.735302954	0.997896845	2050615395
chr2R	7942568	7942580	13	CG34430_7943442	>blimp-1	0.77	+	# GTAGAAAAAGTT	0.83555333	0.997896845	2101384617
chr2R	13157392	13157404	13	CG34439_13158666	>blimp-1	0.78	-	# ATATTGAAAGAG	0.735302954	0.997896845	3036307643
chr2R	14369121	14369133	13	CG34444_14369217	>blimp-1	0.8	-	# GCAGCGAAAGTT	0.450375563	0.997896845	2950615356
chr2R	16671289	16671301	13	CG34458_16672033	>blimp-1	0.75	+	# GTTTTGAAAGCG	0.942814221	0.997896845	2011846141
chr2R	24444537	24444549	13	CG3483_24445500	>blimp-1	0.78	+	# GAATTGAATGTG	0.735302954	0.997896845	2215538456
chr2R	24444611	24444623	13	CG3483_24445500	>blimp-1	0.75	-	# AAATTGAAAGTT	0.942814221	0.997896845	2706538444
chr2R	23348497	23348509	13	CG3502_23347641	>blimp-1	0.77	-	# TTAATTAAAGTG	0.83555333	0.997896845	3346230759
chr2R	24661061	24661073	13	CG3663_24661503	>blimp-1	0.77	+	# TTATTGAAATTG	0.83555333	0.997896845	38949231
chr2R	24660102	24660114	13	CG3663_24661503	>blimp-1	0.76	-	# TTATTGAATGTG	0.904056084	0.997896845	2284615352
chr2R	16236085	16236097	13	CG3687_16236715	>blimp-1	0.77	+	# TTTGAGAAAGTG	0.83555333	0.997896845	2169230806
chr2R	24944356	24944368	13	CG3770_24945665	>blimp-1	0.83	+	# GTAGTAATAGTG	0.276815223	0.997896845	2135923081
chr2R	24944473	24944485	13	CG3770_24945665	>blimp-1	0.88	+	# AGAGTGAAAGTG	0.041161743	0.997896845	3393153823
chr2R	24968777	24968789	13	CG3776_24969811	>blimp-1	0.77	-	# GAAGTGCAAGGG	0.83555333	0.997896845	4268999943
chr2R	22934701	22934713	13	CG3788_22934077	>blimp-1	0.78	-	# GAACTGAAGGTG	0.735302954	0.997896845	2306461531
chr2R	12878173	12878185	13	CG3814_12876966	>blimp-1	0.79	+	# GCTGCGAAAGTG	0.572058087	0.997896845	2588769188
chr2R	22941090	22941102	13	CG3831_22940946	>blimp-1	0.78	-	# CGAGTGCAAGTG	0.735302954	0.997896845	2250230789
chr2R	24759178	24759190	13	CG3880_24760664	>blimp-1	0.77	+	# GGAGTGTAAGTT	0.83555333	0.997896845	256576926
chr2R	24759833	24759845	13	CG3880_24760664	>blimp-1	0.82	-	# GTAGTGACAGCG	0.316875313	0.997896845	2911153834
chr2R	24761255	24761267	13	CG3894_24763167	>blimp-1	0.75	-	# AAATGGAAAGTG	0.942814221	0.997896845	246938462
chr2R	23513887	23513899	13	CG3906_23512225	>blimp-1	0.78	+	# GAAATGAAAATG	0.735302954	0.997896845	2560384617
chr2R	23616443	23616455	13	CG4019_23614710	>blimp-1	0.8	-	# GCACCGAAAGTG	0.450375563	0.997896845	2216076937
chr2R	21097957	21097969	13	CG4038_21097305	>blimp-1	0.75	-	# CAATCGAAAGTG	0.942814221	0.997896845	252353848
chr2R	21129114	21129126	13	CG4050_21128510	>blimp-1	0.76	+	# GTAGTAAAAGCA	0.904056084	0.997896845	37527693
chr2R	21128033	21128045	13	CG4050_21127586	>blimp-1	0.89	+	# CAAGTGAAAGTG	0.030245368	0.997896845	2876692346
chr2R	22824031	22824043	13	CG42284_22825093	>blimp-1	0.8	+	# TAAGTTAAAGTG	0.450375563	0.997896845	2303153838
chr2R	18662830	18662842	13	CG42306_18661548	>blimp-1	0.78	-	# GCATTGATAGTG	0.735302954	0.997896845	2337153834
chr2R	18663119	18663131	13	CG42306_18661548	>blimp-1	0.82	-	# AAATTGAAAGTG	0.316875313	0.997896845	3917692294
chr2R	11297117	11297129	13	CG42336_11296215	>blimp-1	0.76	-	# TTGGTGAAAGTC	0.904056084	0.997896845	2733230726
chr2R	15612961	15612973	13	CG42524_15613854	>blimp-1	0.83	+	# GTAGTAAAAATG	0.276815223	0.997896845	2663384623
chr2R	17683729	17683741	13	CG42561_17684855	>blimp-1	0.79	+	# TAAGTGAAATTG	0.572058087	0.997896845	2281230796
chr2R	17683002	17683014	13	CG42561_17684855	>blimp-1	0.8	-	# GCAGCCAAAGTG	0.450375563	0.997896845	2199230776
chr2R	8737081	8737093	13	CG42615_8737370	>blimp-1	0.79	+	# TGAGTGAAAGTT	0.572058087	0.997896845	3231538383
chr2R	17601026	17601038	13	CG42649_17599607	>blimp-1	0.78	-	# ATAGTCAAAGTC	0.735302954	0.997896845	2032615379
chr2R	21170477	21170489	13	CG4266_21168659	>blimp-1	0.78	+	# GCAGAGAAACTG	0.735302954	0.997896845	3265230843
chr2R	12704152	12704164	13	CG42663_12705172	>blimp-1	0.88	-	# TCAGTGAAAGTG	0.041161743	0.997896845	2246999981
chr2R	21294461	21294473	13	CG42672_21295652	>blimp-1	0.78	+	# GAAGGGAATGTG	0.735302954	0.997896845	284415381
chr2R	22924550	22924562	13	CG42678_22925107	>blimp-1	0.8	+	# GAATTGAAAGTC	0.450375563	0.997896845	3297000048
chr2R	22927342	22927354	13	CG42678_22928734	>blimp-1	0.77	+	# GAGGTGAAGGTG	0.83555333	0.997896845	3531384577
chr2R	18613318	18613330	13	CG42697_18612730	>blimp-1	0.84	+	# GTGTTGAAAGTG	0.236154231	0.997896845	2229153878
chr2R	18614510	18614522	13	CG42697_18612730	>blimp-1	0.78	-	# GCAGTGAAACTT	0.735302954	0.997896845	3714076929
chr2R	12290436	12290448	13	CG42700_12290789	>blimp-1	0.8	-	# CAAGTGAAAATG	0.450375563	0.997896845	2627230763
chr2R	10366516	10366528	13	CG42732_10365187	>blimp-1	0.76	+	# GGTGTGAAAATG	0.904056084	0.997896845	2843384578
chr2R	23044058	23044070	13	CG42741_23042943	>blimp-1	0.75	+	# GTCGTCAAAGCG	0.942814221	0.997896845	3186615348
chr2R	23043080	23043092	13	CG42741_23042943	>blimp-1	0.76	-	# TTAGTTAAGGTG	0.904056084	0.997896845	3433000024
chr2R	19633455	19633467	13	CG42753_19635279	>blimp-1	0.81	-	# CAAGTGAAAGTT	0.374862293	0.997896845	2378384595
chr2R	13573918	13573930	13	CG42807_13572759	>blimp-1	0.76	-	# GTAATCAAAGTA	0.904056084	0.997896845	2152076973
chr2R	22606128	22606140	13	CG4294_22605667	>blimp-1	0.76	+	# GTAGGAAAAGAG	0.904056084	0.997896845	3328076894
chr2R	18514415	18514427	13	CG43066_18514574	>blimp-1	0.79	+	# TCAATGAAAGTG	0.572058087	0.997896845	2735538492
chr2R	15184810	15184822	13	CG43068_15185158	>blimp-1	0.75	+	# GTAATTAAAATG	0.942814221	0.997896845	2755999978
chr2R	18860865	18860877	13	CG43069_18862862	>blimp-1	0.79	+	# GATGTGAAAGTA	0.572058087	0.997896845	3838153856
chr2R	18866277	18866289	13	CG43071_18865218	>blimp-1	0.78	+	# ATAGTGAAATTA	0.735302954	0.997896845	2114692307
chr2R	17142647	17142659	13	CG43107_17140865	>blimp-1	0.84	+	# GTAGTGAAAATT	0.236154231	0.997896845	2685615336
chr2R	8591548	8591560	13	CG43183_8592195	>blimp-1	0.79	-	# GGATCGAAAGTG	0.572058087	0.997896845	2161692285
chr2R	16378697	16378709	13	CG43187_16380516	>blimp-1	0.76	+	# GGCGTGAAATTG	0.904056084	0.997896845	3037076923
chr2R	16379319	16379331	13	CG43187_16380516	>blimp-1	0.8	+	# AATGTGAAAGTG	0.450375563	0.997896845	3328769244
chr2R	11084907	11084919	13	CG43188_11085586	>blimp-1	0.8	+	# CAAGTGAAAATG	0.450375563	0.997896845	2059846147
chr2R	23151208	23151220	13	CG43207_23152748	>blimp-1	0.76	-	# GTAATGAAATTA	0.904056084	0.997896845	3184153846
chr2R	17561978	17561990	13	CG43324_17563606	>blimp-1	0.75	-	# GTACGGAATGTG	0.942814221	0.997896845	3602230694
chr2R	19028666	19028678	13	CG43351_19030009	>blimp-1	0.77	-	# CTAGTCAAAATG	0.83555333	0.997896845	2955615406
chr2R	5893214	5893226	13	CG43366_5893895	>blimp-1	0.79	+	# GCAAAGAAAGTG	0.572058087	0.997896845	3313846148
chr2R	7017066	7017078	13	CG43646_7018760	>blimp-1	0.75	+	# GTAGTTGAAGTT	0.942814221	0.997896845	2058615393
chr2R	7016823	7016835	13	CG43646_7018760	>blimp-1	0.81	-	# TAATTGAAAGTG	0.374862293	0.997896845	2121999968
chr2R	15423018	15423030	13	CG43729_15424807	>blimp-1	0.82	-	# GTTGTGACAGTG	0.316875313	0.997896845	208300002
chr2R	21938779	21938791	13	CG43742_21936863	>blimp-1	0.8	-	# AATGTGAAAGTG	0.450375563	0.997896845	2642230796
chr2R	16936972	16936984	13	CG43788_16937597	>blimp-1	0.76	+	# TTATTGCAAGTG	0.904056084	0.997896845	215007689
chr2R	21801423	21801435	13	CG4386_21800904	>blimp-1	0.86	-	# GTAGCGAAAGTT	0.119479219	0.997896845	3657615313
chr2R	16442652	16442664	13	CG4409_16443211	>blimp-1	0.78	+	# GCTGTCAAAGTG	0.735302954	0.997896845	3028307695
chr2R	22066023	22066035	13	CG44249_22066883	>blimp-1	0.83	+	# AAAGCGAAAGTG	0.276815223	0.997896845	2336923049
chr2R	22066715	22066727	13	CG44249_22066883	>blimp-1	0.85	+	# TTAGTGAAAGTC	0.170255383	0.997896845	2045384627
chr2R	23057012	23057024	13	CG44252_23058248	>blimp-1	0.79	+	# GCTGCGAAAGTG	0.572058087	0.997896845	2297461583
chr2R	5881228	5881240	13	CG44438_5880395	>blimp-1	0.77	+	# TTCGTGAAAGTT	0.83555333	0.997896845	3205307695
chr2R	5882332	5882344	13	CG44438_5880395	>blimp-1	0.75	-	# GTAGTGAAATAA	0.942814221	0.997896845	356400002
chr2R	19952830	19952842	13	CG44622_19953795	>blimp-1	0.8	-	# CAAGTGAAAATG	0.450375563	0.997896845	3564538498
chr2R	19956121	19956133	13	CG44623_19956195	>blimp-1	0.76	-	# GTCGGAAAAGTG	0.904056084	0.997896845	2294769249
chr2R	19955891	19955903	13	CG44623_19956195	>blimp-1	0.78	-	# GCCGTTAAAGTG	0.735302954	0.997896845	3019769238
chr2R	20233818	20233830	13	CG44624_20234995	>blimp-1	0.76	+	# CTGGTGAATGTG	0.904056084	0.997896845	2872461527
chr2R	20233602	20233614	13	CG44624_20234995	>blimp-1	0.79	-	# GCACGGAAAGTG	0.572058087	0.997896845	236915389
chr2R	20233425	20233437	13	CG44624_20234995	>blimp-1	0.77	-	# TTATTGAAACTG	0.83555333	0.997896845	3695769229
chr2R	24413586	24413598	13	CG45069_24414735	>blimp-1	0.78	-	# GCGGTTAAAGTG	0.735302954	0.997896845	2135769233
chr2R	18535875	18535887	13	CG45087_18536767	>blimp-1	0.78	-	# GAAATGAAGGTG	0.735302954	0.997896845	2336230792
chr2R	7746913	7746925	13	CG45093_7745297	>blimp-1	0.8	-	# GAAACGAAAGTG	0.450375563	0.997896845	2109999966
chr2R	7747155	7747167	13	CG45093_7745297	>blimp-1	0.81	-	# AAAATGAAAGTG	0.374862293	0.997896845	2422461519
chr2R	22482110	22482122	13	CG4554_22483303	>blimp-1	0.84	+	# GGAGTGGAAGTG	0.236154231	0.997896845	2244461565
chr2R	13240245	13240257	13	CG4679_13239468	>blimp-1	0.77	-	# GACGTGACAGTG	0.83555333	0.997896845	2468846157
chr2R	24608848	24608860	13	CG4707_24607023	>blimp-1	0.77	-	# GTAGGAAAAGTA	0.83555333	0.997896845	2007923055
chr2R	13299607	13299619	13	CG4734_13298467	>blimp-1	0.86	-	# GATGTGAAAGTG	0.119479219	0.997896845	30416923
chr2R	13299904	13299916	13	CG4734_13298467	>blimp-1	0.86	-	# GCTGTGAAAGTG	0.119479219	0.997896845	3481461621
chr2R	24611910	24611922	13	CG4741_24611844	>blimp-1	0.79	-	# GAGGTGAAAGTT	0.572058087	0.997896845	2334846193
chr2R	24612696	24612708	13	CG4741_24611844	>blimp-1	0.76	-	# GCCGTGAAGGTG	0.904056084	0.997896845	3137769254
chr2R	13399617	13399629	13	CG4744_13399368	>blimp-1	0.76	+	# GTTGTCAAAGTT	0.904056084	0.997896845	3250307688
chr2R	24643311	24643323	13	CG4781_24642239	>blimp-1	0.77	-	# TTATTGAAAATG	0.83555333	0.997896845	3006461556
chr2R	23883855	23883867	13	CG4882_23882927	>blimp-1	0.86	-	# GACGTGAAAGTG	0.119479219	0.997896845	3164230732
chr2R	23884296	23884308	13	CG4882_23882927	>blimp-1	0.78	-	# GCAGTGAAAATT	0.735302954	0.997896845	3787307673
chr2R	17726714	17726726	13	CG4975_17726914	>blimp-1	0.76	+	# GCAGTGACATTG	0.904056084	0.997896845	2822769248
chr2R	17725768	17725780	13	CG4975_17726914	>blimp-1	0.79	-	# GCTGCGAAAGTG	0.572058087	0.997896845	2251384604
chr2R	17759409	17759421	13	CG5009_17760940	>blimp-1	0.8	+	# CGAGGGAAAGTG	0.450375563	0.997896845	2160153802
chr2R	16611847	16611859	13	CG5065_16611876	>blimp-1	0.79	-	# GAAGTGAAAGAT	0.572058087	0.997896845	3472000012
chr2R	16606316	16606328	13	CG5065_16608031	>blimp-1	0.79	-	# TAAGTGGAAGTG	0.572058087	0.997896845	2427153805
chr2R	16617157	16617169	13	CG5065_16618036	>blimp-1	0.81	+	# AAAGTGAAAGTC	0.374862293	0.997896845	2937846074
chr2R	18016992	18017004	13	CG5084_18018665	>blimp-1	0.77	+	# GTATTTAAAGCG	0.83555333	0.997896845	2344384611
chr2R	18017061	18017073	13	CG5084_18018665	>blimp-1	0.92	+	# GTAATGAAAGTG	0.014922384	0.997896845	3651538491
chr2R	18445333	18445345	13	CG5189_18446548	>blimp-1	0.76	+	# TTTGTCAAAGTG	0.904056084	0.997896845	3056230783
chr2R	18450614	18450626	13	CG5190_18451284	>blimp-1	0.76	+	# GTTTTCAAAGTG	0.904056084	0.997896845	2943615451
chr2R	18615581	18615593	13	CG5327_18615988	>blimp-1	0.77	+	# GATGTGAAGGTG	0.83555333	0.997896845	2584384628
chr2R	23899406	23899418	13	CG5339_23898246	>blimp-1	0.79	+	# CGAATGAAAGTG	0.572058087	0.997896845	3265846136
chr2R	23899097	23899109	13	CG5339_23898246	>blimp-1	0.79	-	# GGAGCAAAAGTG	0.572058087	0.997896845	2849153891
chr2R	16765735	16765747	13	CG5348_16766804	>blimp-1	0.77	-	# GGAGTGAAAATT	0.83555333	0.997896845	2421538423
chr2R	18618938	18618950	13	CG5493_18618018	>blimp-1	0.77	+	# GTTGCGAAAGTT	0.83555333	0.997896845	2998692338
chr2R	16781810	16781822	13	CG5522_16783671	>blimp-1	0.75	-	# GTGGAGAAAGAG	0.942814221	0.997896845	2448923102
chr2R	23804372	23804384	13	CG5539_23804811	>blimp-1	0.8	+	# AAAGTGAAGGTG	0.450375563	0.997896845	2225000003
chr2R	23804645	23804657	13	CG5539_23804811	>blimp-1	0.84	+	# GTAGAGAAAGGG	0.236154231	0.997896845	2694769329
chr2R	16814971	16814983	13	CG5550_16816589	>blimp-1	0.75	-	# GTTTTGAAATTG	0.942814221	0.997896845	2750846143
chr2R	23844607	23844619	13	CG5554_23845001	>blimp-1	0.76	+	# GAAGTGATCGTG	0.904056084	0.997896845	2223000001
chr2R	23843826	23843838	13	CG5554_23845001	>blimp-1	0.76	-	# GTGGCGAAATTG	0.904056084	0.997896845	2794923092
chr2R	23886843	23886855	13	CG5597_23886973	>blimp-1	0.77	+	# GGAGAGGAAGTG	0.83555333	0.997896845	2044230787
chr2R	18049340	18049352	13	CG5767_18047484	>blimp-1	0.79	-	# GCACTGAAAGTA	0.572058087	0.997896845	2379538494
chr2R	22548995	22549007	13	CG6018_22550094	>blimp-1	0.76	-	# TTAGTTAATGTG	0.904056084	0.997896845	3533846165
chr2R	13547873	13547885	13	CG6145_13547012	>blimp-1	0.81	+	# GAATCGAAAGTG	0.374862293	0.997896845	2196153828
chr2R	13694174	13694186	13	CG6220_13693369	>blimp-1	0.76	+	# GTAATGAAATTT	0.904056084	0.997896845	3895153871
chr2R	13753931	13753943	13	CG6280_13753964	>blimp-1	0.79	-	# CGAATGAAAGTG	0.572058087	0.997896845	3574692387
chr2R	17740860	17740872	13	CG6401_17739685	>blimp-1	0.76	-	# GCAGTGCAAGAG	0.904056084	0.997896845	2191615345
chr2R	17428859	17428871	13	CG6550_17427511	>blimp-1	0.75	-	# GTAATTAAGGTG	0.942814221	0.997896845	2557076984
chr2R	17408836	17408848	13	CG6568_17407150	>blimp-1	0.77	+	# GAGGTGAAGGTG	0.83555333	0.997896845	3065307695
chr2R	17408202	17408214	13	CG6568_17407150	>blimp-1	0.95	+	# GAAGTGAAAGTG	0.004206309	0.997896845	2721384635
chr2R	16956760	16956772	13	CG6665_16957465	>blimp-1	0.76	-	# GCAGTGCCAGTG	0.904056084	0.997896845	2340538458
chr2R	17001609	17001621	13	CG6796_17001994	>blimp-1	0.8	-	# CAGGTGAAAGTG	0.450375563	0.997896845	2719153839
chr2R	17061205	17061217	13	CG6967_17062775	>blimp-1	0.82	-	# GTAGTGCAACTG	0.316875313	0.997896845	2045615331
chr2R	19225889	19225901	13	CG7137_19227344	>blimp-1	0.79	+	# GCAGGGAAAGTC	0.572058087	0.997896845	3805384618
chr2R	19225843	19225855	13	CG7137_19227344	>blimp-1	0.76	-	# GTAGACAAACTG	0.904056084	0.997896845	3529769246
chr2R	10730028	10730040	13	CG7220_10731390	>blimp-1	0.75	-	# GTGCTCAAAGTG	0.942814221	0.997896845	3254846136
chr2R	11306346	11306358	13	CG7745_11307879	>blimp-1	0.77	+	# GCAGTCCAAGTG	0.83555333	0.997896845	2445230791
chr2R	16295984	16295996	13	CG7747_16294130	>blimp-1	0.91	+	# GTAGTGAACGTG	0.02203305	0.997896845	3059076908
chr2R	11413357	11413369	13	CG7763_11414510	>blimp-1	0.87	+	# GAAGTAAAAGTG	0.067100651	0.997896845	3504769279
chr2R	11414047	11414059	13	CG7763_11414510	>blimp-1	0.75	+	# GTCGTGAAATTA	0.942814221	0.997896845	2949615332
chr2R	16223068	16223080	13	CG7798_16222627	>blimp-1	0.81	+	# CCATTGAAAGTG	0.374862293	0.997896845	2485846186
chr2R	16345149	16345161	13	CG7997_16344182	>blimp-1	0.82	+	# GTAGTGAGATTG	0.316875313	0.997896845	2587153876
chr2R	9207614	9207626	13	CG8027_9207124	>blimp-1	0.75	+	# GTGGTGAAAATT	0.942814221	0.997896845	2372999994
chr2R	9092899	9092911	13	CG8080_9092805	>blimp-1	0.8	+	# GAAGCGAAAGCG	0.450375563	0.997896845	2296846147
chr2R	9031827	9031839	13	CG8170_9031045	>blimp-1	0.78	+	# GAACTGAAAATG	0.735302954	0.997896845	2514999958
chr2R	9032749	9032761	13	CG8170_9031045	>blimp-1	0.81	-	# GAATCGAAAGTG	0.374862293	0.997896845	3097692272
chr2R	9012497	9012509	13	CG8172_9012064	>blimp-1	0.75	+	# AAAGCAAAAGTG	0.942814221	0.997896845	3688615311
chr2R	15483490	15483502	13	CG8180_15482834	>blimp-1	0.77	+	# TTAGTTAAATTG	0.83555333	0.997896845	2266769187
chr2R	15542392	15542404	13	CG8187_15541363	>blimp-1	0.85	-	# GTAGCAAAAGTG	0.170255383	0.997896845	2444000033
chr2R	15542452	15542464	13	CG8187_15541363	>blimp-1	0.75	-	# GTAGTGTAAGCT	0.942814221	0.997896845	24452308
chr2R	15550607	15550619	13	CG8192_15549984	>blimp-1	0.76	+	# GTATTGAAAATA	0.904056084	0.997896845	2525153839
chr2R	15551268	15551280	13	CG8192_15549984	>blimp-1	0.79	-	# GCAAAGAAAGTG	0.572058087	0.997896845	336792304
chr2R	9063579	9063591	13	CG8197_9061924	>blimp-1	0.92	+	# GTAGTAAAAGTG	0.014922384	0.997896845	3609384573
chr2R	8987401	8987413	13	CG8213_8985900	>blimp-1	0.78	+	# GGAGAGAAAGTC	0.735302954	0.997896845	206184616
chr2R	8987033	8987045	13	CG8213_8985900	>blimp-1	0.79	+	# ATAACGAAAGTG	0.572058087	0.997896845	3341769255
chr2R	8986827	8986839	13	CG8213_8985900	>blimp-1	0.78	+	# GCAGTGAAATTT	0.735302954	0.997896845	3037923107
chr2R	8985635	8985647	13	CG8213_8985575	>blimp-1	0.82	+	# AAAGTGAAAGTT	0.316875313	0.997896845	342715389
chr2R	8921385	8921397	13	CG8243_8922785	>blimp-1	0.77	+	# CTCGTTAAAGTG	0.83555333	0.997896845	2577384623
chr2R	8921438	8921450	13	CG8243_8922785	>blimp-1	0.78	+	# GCAGTGAAGGTA	0.735302954	0.997896845	2805769251
chr2R	8908664	8908676	13	CG8258_8906990	>blimp-1	0.77	+	# GTAGCCAAAGAG	0.83555333	0.997896845	2204615373
chr2R	15943071	15943083	13	CG8299_15941483	>blimp-1	0.76	-	# GTGGAAAAAGTG	0.904056084	0.997896845	3142384557
chr2R	16604368	16604380	13	CG8303_16604238	>blimp-1	0.75	-	# GTAATGAAAATC	0.942814221	0.997896845	3497769127
chr2R	16595174	16595186	13	CG8306_16594646	>blimp-1	0.85	-	# TTAGTTAAAGTG	0.170255383	0.997896845	2025538458
chr2R	16589992	16590004	13	CG8311_16589184	>blimp-1	0.78	-	# GCTGTCAAAGTG	0.735302954	0.997896845	2649692327
chr2R	12033425	12033437	13	CG8321_12034211	>blimp-1	0.75	+	# GTAATGAAAACG	0.942814221	0.997896845	2333692321
chr2R	14163992	14164004	13	CG8323_14165051	>blimp-1	0.75	+	# GTAGCGTAAGGG	0.942814221	0.997896845	2646307695
chr2R	14169946	14169958	13	CG8331_14170462	>blimp-1	0.76	-	# TTAGTGAAACAG	0.904056084	0.997896845	2440538466
chr2R	6179653	6179665	13	CG8343_6179726	>blimp-1	0.75	+	# CTAGTGACATTG	0.942814221	0.997896845	2686923077
chr2R	15954481	15954493	13	CG8366_15955040	>blimp-1	0.75	-	# ATAGTGGATGTG	0.942814221	0.997896845	292092312
chr2R	16011086	16011098	13	CG8389_16011680	>blimp-1	0.82	+	# GTTGTGAAAGAG	0.316875313	0.997896845	2366769201
chr2R	16007303	16007315	13	CG8389_16008339	>blimp-1	0.76	-	# GTTCGGAAAGTG	0.904056084	0.997896845	371446156
chr2R	16016044	16016056	13	CG8399_16017737	>blimp-1	0.76	+	# GTAATGAAAATT	0.904056084	0.997896845	2169384621
chr2R	16016548	16016560	13	CG8399_16017737	>blimp-1	0.77	+	# GTATTTAAAGGG	0.83555333	0.997896845	2867923032
chr2R	16027174	16027186	13	CG8401_16028603	>blimp-1	0.77	+	# CTGGTTAAAGTG	0.83555333	0.997896845	300776925
chr2R	16027978	16027990	13	CG8401_16028603	>blimp-1	0.83	-	# GTAGTGAAAATC	0.276815223	0.997896845	2457538531
chr2R	16045938	16045950	13	CG8405_16047648	>blimp-1	0.75	-	# GTATTGACAGTC	0.942814221	0.997896845	3563000129
chr2R	16187764	16187776	13	CG8441_16186022	>blimp-1	0.75	+	# AAAGCAAAAGTG	0.942814221	0.997896845	2237615374
chr2R	14242099	14242111	13	CG8503_14243778	>blimp-1	0.75	-	# GTAGAGATAGTC	0.942814221	0.997896845	2968307683
chr2R	14241847	14241859	13	CG8503_14243778	>blimp-1	0.75	-	# GTGGTAAAAGAG	0.942814221	0.997896845	2925307696
chr2R	14254533	14254545	13	CG8531_14256493	>blimp-1	0.75	+	# GTTGTCAAAGTC	0.942814221	0.997896845	4114000033
chr2R	12517644	12517656	13	CG8569_12519166	>blimp-1	0.78	+	# ATAGTTAAAGAG	0.735302954	0.997896845	2543615325
chr2R	12654053	12654065	13	CG8646_12655954	>blimp-1	0.78	+	# GCAGAGTAAGTG	0.735302954	0.997896845	2993615403
chr2R	12655642	12655654	13	CG8646_12655954	>blimp-1	0.79	+	# GCATTAAAAGTG	0.572058087	0.997896845	2267692341
chr2R	19979470	19979482	13	CG8654_19981070	>blimp-1	0.79	-	# GAAATAAAAGTG	0.572058087	0.997896845	3035538487
chr2R	19979448	19979460	13	CG8654_19981070	>blimp-1	0.75	-	# GTAGTTAAAATC	0.942814221	0.997896845	275923077
chr2R	19981647	19981659	13	CG8654_19982110	>blimp-1	0.8	-	# TCAGTGAAAGTT	0.450375563	0.997896845	2800230788
chr2R	8163186	8163198	13	CG8708_8161565	>blimp-1	0.77	-	# GTAGCCAAAGTC	0.83555333	0.997896845	3122615413
chr2R	7972933	7972945	13	CG8726_7972003	>blimp-1	0.78	-	# GAAGAGCAAGTG	0.735302954	0.997896845	3744000002
chr2R	7973058	7973070	13	CG8726_7972003	>blimp-1	0.77	-	# GGAGTGCAAGTT	0.83555333	0.997896845	4015923122
chr2R	8595742	8595754	13	CG8736_8595001	>blimp-1	0.77	+	# CTAGTGCAAGTT	0.83555333	0.997896845	3106538497
chr2R	8595099	8595111	13	CG8736_8595001	>blimp-1	0.92	+	# GTAATGAAAGTG	0.014922384	0.997896845	3081076915
chr2R	9097580	9097592	13	CG8777_9098539	>blimp-1	0.77	-	# TTGGAGAAAGTG	0.83555333	0.997896845	2965615319
chr2R	12649426	12649438	13	CG8785_12648224	>blimp-1	0.76	-	# GTAGACAAAATG	0.904056084	0.997896845	2075615385
chr2R	9397852	9397864	13	CG8800_9396206	>blimp-1	0.77	+	# GATGTGGAAGTG	0.83555333	0.997896845	3738692323
chr2R	9396856	9396868	13	CG8800_9396206	>blimp-1	0.76	+	# GTACAGAAACTG	0.904056084	0.997896845	2528076896
chr2R	9396375	9396387	13	CG8800_9396206	>blimp-1	0.84	-	# GTATTGAAAATG	0.236154231	0.997896845	2805692262
chr2R	12230132	12230144	13	CG8854_12229310	>blimp-1	0.86	+	# GCACTGAAAGTG	0.119479219	0.997896845	2812615427
chr2R	12199507	12199519	13	CG8858_12198854	>blimp-1	0.75	+	# GTCCTGAAAGTC	0.942814221	0.997896845	3792615386
chr2R	20320886	20320898	13	CG8920_20320994	>blimp-1	0.86	+	# ATGGTGAAAGTG	0.119479219	0.997896845	2063615423
chr2R	11649849	11649861	13	CG9003_11648514	>blimp-1	0.8	+	# AAAGTGTAAGTG	0.450375563	0.997896845	2530615362
chr2R	16962164	16962176	13	CG9010_16960195	>blimp-1	0.75	-	# GTTGCGGAAGTG	0.942814221	0.997896845	2363307659
chr2R	11280065	11280077	13	CG9067_11279683	>blimp-1	0.82	+	# GTGGTGAACGTG	0.316875313	0.997896845	2350384561
chr2R	11220613	11220625	13	CG9084_11219241	>blimp-1	0.77	+	# ATATTGATAGTG	0.83555333	0.997896845	5189076946
chr2R	11219927	11219939	13	CG9084_11219241	>blimp-1	0.78	-	# ATAGCGACAGTG	0.735302954	0.997896845	2491384616
chr2R	20907992	20908004	13	CG9235_20909704	>blimp-1	0.8	+	# GAATTCAAAGTG	0.450375563	0.997896845	2488384612
chr2R	21859981	21859993	13	CG9294_21860825	>blimp-1	0.77	-	# TTAGTGAAAGCA	0.83555333	0.997896845	3440384571
chr2R	20978039	20978051	13	CG9313_20979321	>blimp-1	0.75	+	# GTACTGGAAGTT	0.942814221	0.997896845	3399461597
chr2R	20977145	20977157	13	CG9313_20978901	>blimp-1	0.78	+	# CTATTGAAAATG	0.735302954	0.997896845	2619153829
chr2R	20976660	20976672	13	CG9344_20977056	>blimp-1	0.75	-	# GTACTGGAAGTT	0.942814221	0.997896845	3839230778
chr2R	8156316	8156328	13	CR44068_8157161	>blimp-1	0.86	-	# GCAGTGAAAGAG	0.119479219	0.997896845	2123615399
chr2R	7342570	7342582	13	CR44071_7343345	>blimp-1	0.83	-	# GTACTGAAATTG	0.276815223	0.997896845	2308307685
chr2R	5884601	5884613	13	CR44125_5884894	>blimp-1	0.77	+	# GTAAACAAAGTG	0.83555333	0.997896845	2295000012
chr2R	5935669	5935681	13	CR44126_5937400	>blimp-1	0.77	+	# GTACATAAAGTG	0.83555333	0.997896845	2752615351
chr2R	6680176	6680188	13	CR44164_6681796	>blimp-1	0.77	-	# TTAGAGAAAATG	0.83555333	0.997896845	2625923082
chr2R	6840300	6840312	13	CR44166_6841545	>blimp-1	0.8	+	# GCAGAGAAAGTT	0.450375563	0.997896845	2148076948
chr2R	6840860	6840872	13	CR44166_6841545	>blimp-1	0.8	+	# GAAATGAAAGTT	0.450375563	0.997896845	2015692341
chr2R	6872168	6872180	13	CR44169_6873149	>blimp-1	0.76	-	# GCAGTGCATGTG	0.904056084	0.997896845	2314846149
chr2R	6977979	6977991	13	CR44170_6979496	>blimp-1	0.77	+	# GCAGTGGAAGCG	0.83555333	0.997896845	2105230784
chr2R	6981863	6981875	13	CR44171_6981195	>blimp-1	0.75	-	# GTAGGCAATGTG	0.942814221	0.997896845	2243461561
chr2R	7433739	7433751	13	CR44204_7432496	>blimp-1	0.76	+	# GGAGTCAAGGTG	0.904056084	0.997896845	2760769194
chr2R	19653597	19653609	13	CR44212_19652995	>blimp-1	0.77	-	# GCAGTGAAACAG	0.83555333	0.997896845	2390846138
chr2R	19659320	19659332	13	CR44214_19657840	>blimp-1	0.75	+	# GTTGTGAAAATA	0.942814221	0.997896845	2364000023
chr2R	8276300	8276312	13	CR44280_8277345	>blimp-1	0.75	+	# GTGGTGAAAATT	0.942814221	0.997896845	2149461524
chr2R	8276551	8276563	13	CR44280_8277345	>blimp-1	0.8	-	# GCAGCAAAAGTG	0.450375563	0.997896845	3032923148
chr2R	24337283	24337295	13	CR44282_24335976	>blimp-1	0.78	-	# GCAATGAAAGTC	0.735302954	0.997896845	2144384632
chr2R	10782478	10782490	13	CR44299_10782895	>blimp-1	0.86	-	# GCGGTGAAAGTG	0.119479219	0.997896845	2365846166
chr2R	10782400	10782412	13	CR44299_10782895	>blimp-1	0.76	-	# TTTGTGAAAGTC	0.904056084	0.997896845	2142307731
chr2R	11846056	11846068	13	CR44304_11845099	>blimp-1	0.75	+	# TTACTGAACGTG	0.942814221	0.997896845	2486615392
chr2R	11846935	11846947	13	CR44304_11845099	>blimp-1	0.75	-	# GTTGGGAAATTG	0.942814221	0.997896845	2300000019
chr2R	12014304	12014316	13	CR44306_12015095	>blimp-1	0.77	+	# TTAATTAAAGTG	0.83555333	0.997896845	3117692365
chr2R	11930364	11930376	13	CR44312_11929796	>blimp-1	0.8	+	# AAAGTGAGAGTG	0.450375563	0.997896845	2168153887
chr2R	13853181	13853193	13	CR44367_13854659	>blimp-1	0.75	+	# GTGGAGAACGTG	0.942814221	0.997896845	3404230728
chr2R	15226231	15226243	13	CR44370_15226938	>blimp-1	0.76	+	# GTTGCGAAAATG	0.904056084	0.997896845	2564076933
chr2R	15914877	15914889	13	CR44373_15915995	>blimp-1	0.8	-	# CGAGTGAAAGTT	0.450375563	0.997896845	2386615359
chr2R	16963717	16963729	13	CR44376_16964295	>blimp-1	0.76	-	# GTAATGAAATTT	0.904056084	0.997896845	3509307623
chr2R	17028008	17028020	13	CR44390_17026993	>blimp-1	0.85	-	# GGAGTGAAACTG	0.170255383	0.997896845	2135384619
chr2R	17765216	17765228	13	CR44416_17766946	>blimp-1	0.85	+	# GTAGTTAAAGTT	0.170255383	0.997896845	2682846092
chr2R	18004332	18004344	13	CR44419_18005395	>blimp-1	0.77	-	# ATTGTGAAATTG	0.83555333	0.997896845	2635076949
chr2R	18004321	18004333	13	CR44419_18005395	>blimp-1	0.78	-	# GCTGTGAAAGTC	0.735302954	0.997896845	2349076936
chr2R	18248610	18248622	13	CR44420_18246763	>blimp-1	0.77	-	# CTTGGGAAAGTG	0.83555333	0.997896845	2504000008
chr2R	8311558	8311570	13	CR44449_8311146	>blimp-1	0.79	-	# GCATTGAAAGCG	0.572058087	0.997896845	3390384582
chr2R	23128452	23128464	13	CR44455_23128077	>blimp-1	0.77	+	# GCAGTTCAAGTG	0.83555333	0.997896845	2562230759
chr2R	19867457	19867469	13	CR44460_19868745	>blimp-1	0.76	+	# GTCGGCAAAGTG	0.904056084	0.997896845	3246846153
chr2R	12905319	12905331	13	CR44461_12906395	>blimp-1	0.78	-	# GAATTGCAAGTG	0.735302954	0.997896845	2173076918
chr2R	12904911	12904923	13	CR44461_12906395	>blimp-1	0.77	-	# TTGGTGAAAGTA	0.83555333	0.997896845	2605307735
chr2R	19504122	19504134	13	CR44472_19504775	>blimp-1	0.75	-	# TTAGTGCAATTG	0.942814221	0.997896845	2068923063
chr2R	19503484	19503496	13	CR44472_19504775	>blimp-1	0.76	-	# GTAGCGGAAGTC	0.904056084	0.997896845	2613153841
chr2R	19606418	19606430	13	CR44474_19605295	>blimp-1	0.78	+	# GAAATGAAAATG	0.735302954	0.997896845	2247769273
chr2R	19692168	19692180	13	CR44506_19692214	>blimp-1	0.78	+	# TGAGTGAAATTG	0.735302954	0.997896845	2411923083
chr2R	19691906	19691918	13	CR44506_19692214	>blimp-1	0.76	-	# TTCGTGAAAATG	0.904056084	0.997896845	278746157
chr2R	19859321	19859333	13	CR44571_19860195	>blimp-1	0.77	+	# GGATTGAAATTG	0.83555333	0.997896845	2792769244
chr2R	19899653	19899665	13	CR44572_19898695	>blimp-1	0.79	+	# ATAGTCAAAGTT	0.572058087	0.997896845	4140076949
chr2R	19911512	19911524	13	CR44573_19911495	>blimp-1	0.78	-	# CTAGCGAAATTG	0.735302954	0.997896845	2352384616
chr2R	19933541	19933553	13	CR44627_19934495	>blimp-1	0.77	-	# GAAGTGCAATTG	0.83555333	0.997896845	3434615405
chr2R	20014171	20014183	13	CR44629_20014495	>blimp-1	0.81	-	# CAAGTGAAAGTC	0.374862293	0.997896845	3325923131
chr2R	20018009	20018021	13	CR44630_20017095	>blimp-1	0.77	+	# GACGTGAACGTG	0.83555333	0.997896845	2119153885
chr2R	20056484	20056496	13	CR44631_20058095	>blimp-1	0.83	+	# GTGATGAAAGTG	0.276815223	0.997896845	3539769219
chr2R	20089313	20089325	13	CR44633_20090795	>blimp-1	0.93	+	# TTAGTGAAAGTG	0.010415623	0.997896845	4001384625
chr2R	20293855	20293867	13	CR44639_20293895	>blimp-1	0.78	-	# CTATTGAAAATG	0.735302954	0.997896845	2424692319
chr2R	20492712	20492724	13	CR44643_20492295	>blimp-1	0.79	+	# TCACTGAAAGTG	0.572058087	0.997896845	2435692363
chr2R	20492689	20492701	13	CR44643_20492295	>blimp-1	0.75	-	# GTGATGAAATTG	0.942814221	0.997896845	3478846238
chr2R	20507705	20507717	13	CR44644_20506395	>blimp-1	0.77	+	# GTATACAAAGTG	0.83555333	0.997896845	2739384601
chr2R	20508456	20508468	13	CR44646_20508495	>blimp-1	0.75	+	# GTCATGAAAGCG	0.942814221	0.997896845	2309230768
chr2R	20511188	20511200	13	CR44649_20511895	>blimp-1	0.92	+	# GTAGTCAAAGTG	0.014922384	0.997896845	3851923099
chr2R	20530335	20530347	13	CR44651_20531867	>blimp-1	0.76	+	# TTAGTCCAAGTG	0.904056084	0.997896845	2967076829
chr2R	20531337	20531349	13	CR44651_20531867	>blimp-1	0.78	+	# GCAGTCAAAGTC	0.735302954	0.997896845	2801461554
chr2R	20560266	20560278	13	CR44653_20562245	>blimp-1	0.75	+	# GTATTGAATGCG	0.942814221	0.997896845	3004615399
chr2R	21533529	21533541	13	CR44725_21532195	>blimp-1	0.8	-	# GAATTGAAAGTT	0.450375563	0.997896845	2961538458
chr2R	21533599	21533611	13	CR44725_21532195	>blimp-1	0.88	-	# GAAGCGAAAGTG	0.041161743	0.997896845	3198615377
chr2R	21533608	21533620	13	CR44725_21532195	>blimp-1	0.75	-	# GTGTTGCAAGTG	0.942814221	0.997896845	2701230776
chr2R	22236967	22236979	13	CR44755_22236795	>blimp-1	0.76	-	# TTAGTTAGAGTG	0.904056084	0.997896845	2092153885
chr2R	22376490	22376502	13	CR44759_22374966	>blimp-1	0.77	-	# GCCGTGAAACTG	0.83555333	0.997896845	2341538428
chr2R	22674805	22674817	13	CR44761_22673695	>blimp-1	0.75	+	# GTAATTAAAATG	0.942814221	0.997896845	3782923139
chr2R	23292616	23292628	13	CR44783_23291377	>blimp-1	0.79	-	# GAAGAGAAAATG	0.572058087	0.997896845	2576153884
chr2R	23292656	23292668	13	CR44783_23291377	>blimp-1	0.78	-	# GAAGTGAAACCG	0.735302954	0.997896845	3158538497
chr2R	23382010	23382022	13	CR44784_23383483	>blimp-1	0.76	-	# ATCGTGAATGTG	0.904056084	0.997896845	2155769238
chr2R	23910496	23910508	13	CR44806_23908875	>blimp-1	0.76	-	# GTATTAAAAATG	0.904056084	0.997896845	2387384653
chr2R	24324216	24324228	13	CR44810_24325027	>blimp-1	0.78	+	# GCCTTGAAAGTG	0.735302954	0.997896845	3941692297
chr2R	24324251	24324263	13	CR44810_24325027	>blimp-1	0.83	-	# AAAGCGAAAGTG	0.276815223	0.997896845	3816230847
chr2R	24327487	24327499	13	CR44810_24329001	>blimp-1	0.82	+	# AAATTGAAAGTG	0.316875313	0.997896845	3484769271
chr2R	24060561	24060573	13	CR44814_24059913	>blimp-1	0.79	-	# GAAGTTAAATTG	0.572058087	0.997896845	3611307667
chr2R	24136760	24136772	13	CR44826_24138629	>blimp-1	0.75	-	# GGGGTGTAAGTG	0.942814221	0.997896845	2974230746
chr2R	13675707	13675719	13	CR45032_13674633	>blimp-1	0.75	+	# AAAGCCAAAGTG	0.942814221	0.997896845	2137846128
chr2R	13675363	13675375	13	CR45032_13674633	>blimp-1	0.81	-	# AAAGTGAAAGTC	0.374862293	0.997896845	2627076928
chr2R	7782281	7782293	13	CR45108_7783334	>blimp-1	0.81	-	# AAAGTGAAATTG	0.374862293	0.997896845	2310000046
chr2R	9283215	9283227	13	CR45132_9284845	>blimp-1	0.79	+	# CTAACGAAAGTG	0.572058087	0.997896845	2129230768
chr2R	10152419	10152431	13	CR45133_10153810	>blimp-1	0.78	+	# GAACTGAAAATG	0.735302954	0.997896845	3630461583
chr2R	10539830	10539842	13	CR45135_10541595	>blimp-1	0.89	+	# CAAGTGAAAGTG	0.030245368	0.997896845	2238000024
chr2R	10541015	10541027	13	CR45135_10541595	>blimp-1	0.8	+	# GCATGGAAAGTG	0.450375563	0.997896845	2621769194
chr2R	12885123	12885135	13	CR45141_12883253	>blimp-1	0.84	+	# GTAATTAAAGTG	0.236154231	0.997896845	3109153926
chr2R	15675644	15675656	13	CR45143_15676441	>blimp-1	0.8	-	# GAAAAGAAAGTG	0.450375563	0.997896845	2772076831
chr2R	17044437	17044449	13	CR45145_17043298	>blimp-1	0.76	+	# GTAGTAAAAGGC	0.904056084	0.997896845	2462538485
chr2R	21031520	21031532	13	CR45148_21030041	>blimp-1	0.77	-	# CTATTGAATGTG	0.83555333	0.997896845	2153230805
chr2R	22417117	22417129	13	CR45152_22416462	>blimp-1	0.75	+	# GTGGCGATAGTG	0.942814221	0.997896845	3128769219
chr2R	23639612	23639624	13	CR45153_23639094	>blimp-1	0.76	-	# TTAGTCAAATTG	0.904056084	0.997896845	3120153828
chr2R	20150581	20150593	13	CR45229_20150683	>blimp-1	0.91	-	# GTAGTGAATGTG	0.02203305	0.997896845	2975615401
chr2R	15023280	15023292	13	CR45256_15025104	>blimp-1	0.77	-	# GAAGTGAATTTG	0.83555333	0.997896845	2920076916
chr2R	12177821	12177833	13	CR45264_12179014	>blimp-1	0.75	+	# GTAGGTACAGTG	0.942814221	0.997896845	2680769312
chr2R	8017813	8017825	13	CR45267_8019176	>blimp-1	0.81	-	# AAAGTGAAATTG	0.374862293	0.997896845	3299538456
chr2R	17801581	17801593	13	CR45270_17801061	>blimp-1	0.78	+	# CGCGTGAAAGTG	0.735302954	0.997896845	2372153848
chr2R	12299602	12299614	13	CR45271_12297805	>blimp-1	0.82	+	# GTGGTGAATGTG	0.316875313	0.997896845	2311923055
chr2R	17120154	17120166	13	CR45272_17121095	>blimp-1	0.78	-	# CGAGTGGAAGTG	0.735302954	0.997896845	3138846122
chr2R	12594724	12594736	13	CR45279_12593827	>blimp-1	0.81	-	# CAAGTGAAAGTT	0.374862293	0.997896845	2353923105
chr2R	16378084	16378096	13	CR45316_16378815	>blimp-1	0.81	+	# AAAGTGAAACTG	0.374862293	0.997896845	3732615416
chr2R	16378270	16378282	13	CR45316_16378815	>blimp-1	0.8	+	# GAAGAAAAAGTG	0.450375563	0.997896845	3108307644
chr2R	16378091	16378103	13	CR45316_16378815	>blimp-1	0.78	-	# GCAGTGACAGTT	0.735302954	0.997896845	3539153888
chr2R	11993824	11993836	13	CR45318_11994995	>blimp-1	0.81	+	# GAAGCGAAAGTT	0.374862293	0.997896845	3045615377
chr2R	11997483	11997495	13	CR45319_11996095	>blimp-1	0.85	-	# GTAGTTAAAGTT	0.170255383	0.997896845	3070230796
chr2R	7450942	7450954	13	CR45320_7451670	>blimp-1	0.76	+	# TTTGTCAAAGTG	0.904056084	0.997896845	2179307701
chr2R	22380853	22380865	13	CR45327_22379007	>blimp-1	0.75	+	# GTAGCGGAAGGG	0.942814221	0.997896845	2409692306
chr2R	22199976	22199988	13	CR45376_22201508	>blimp-1	0.81	+	# TAATTGAAAGTG	0.374862293	0.997896845	2562999991
chr2R	11708154	11708166	13	CR45377_11706222	>blimp-1	0.95	+	# GAAGTGAAAGTG	0.004206309	0.997896845	2067615355
chr2R	11706476	11706488	13	CR45377_11706222	>blimp-1	0.76	-	# TTAATGAAAATG	0.904056084	0.997896845	3123000012
chr2R	20223772	20223784	13	CR45423_20222157	>blimp-1	0.75	+	# GGAGTGCAACTG	0.942814221	0.997896845	2146999987
chr2R	20222202	20222214	13	CR45423_20222157	>blimp-1	0.77	+	# GTACAAAAAGTG	0.83555333	0.997896845	2256846159
chr2R	9879818	9879830	13	CR45467_9881396	>blimp-1	0.76	+	# CTCGTGAAACTG	0.904056084	0.997896845	2374076972
chr2R	9879533	9879545	13	CR45467_9881396	>blimp-1	0.77	-	# GATGTGGAAGTG	0.83555333	0.997896845	3268615355
chr2R	23904232	23904244	13	CR45926_23905334	>blimp-1	0.86	+	# TTATTGAAAGTG	0.119479219	0.997896845	2637230823
chr2R	15539514	15539526	13	CR45927_15540887	>blimp-1	0.77	+	# GGAGTGTAAGTT	0.83555333	0.997896845	2331384583
chr2R	15540761	15540773	13	CR45927_15540887	>blimp-1	0.8	-	# ACAGTGAAAATG	0.450375563	0.997896845	2055692311
chr2R	23850216	23850228	13	CR45928_23850330	>blimp-1	0.8	-	# GAAGCGAAATTG	0.450375563	0.997896845	2287846165
chr2R	7970442	7970454	13	CSN4_7972175	>blimp-1	0.77	-	# ATAGTGATAGTC	0.83555333	0.997896845	238361537
chr2R	16263804	16263816	13	csul_16264652	>blimp-1	0.75	+	# TTAGTGAGATTG	0.942814221	0.997896845	2781769209
chr2R	16263830	16263842	13	csul_16264652	>blimp-1	0.82	+	# GTACTGATAGTG	0.316875313	0.997896845	3056769185
chr2R	11884969	11884981	13	cuff_11886067	>blimp-1	0.84	+	# GTCGTGAAAGTA	0.236154231	0.997896845	2812461554
chr2R	10459119	10459131	13	Cyp49a1_10458892	>blimp-1	0.82	-	# AAATTGAAAGTG	0.316875313	0.997896845	253223077
chr2R	10454436	10454448	13	Cyp49a1_10452460	>blimp-1	0.87	-	# GAAGTGAAAGTC	0.067100651	0.997896845	2184846113
chr2R	15941360	15941372	13	Cyp4aa1_15942864	>blimp-1	0.76	+	# GTACGGAAAGTC	0.904056084	0.997896845	2006538487
chr2R	8441613	8441625	13	Cyp4ad1_8441121	>blimp-1	0.76	-	# GGAGTACAAGTG	0.904056084	0.997896845	2448230744
chr2R	14876264	14876276	13	Cyp6a19_14877786	>blimp-1	0.78	-	# GACGTAAAAGTG	0.735302954	0.997896845	2170538516
chr2R	14887921	14887933	13	Cyp6a21_14886947	>blimp-1	0.78	-	# GTAGGTAAAGTT	0.735302954	0.997896845	2593615355
chr2R	14870069	14870081	13	Cyp6a22_14871688	>blimp-1	0.86	-	# ATAGTTAAAGTG	0.119479219	0.997896845	2224538464
chr2R	14874380	14874392	13	Cyp6a23_14875829	>blimp-1	0.78	-	# GACGTAAAAGTG	0.735302954	0.997896845	2392692318
chr2R	14882537	14882549	13	Cyp6a9_14881372	>blimp-1	0.79	+	# GAGGTAAAAGTG	0.572058087	0.997896845	224469235
chr2R	6974695	6974707	13	Cyp6u1_6973929	>blimp-1	0.83	-	# GTAGTGGAAGTA	0.276815223	0.997896845	2671153816
chr2R	6974966	6974978	13	Cyp6u1_6973929	>blimp-1	0.84	-	# TTTGTGAAAGTG	0.236154231	0.997896845	2160999996
chr2R	7131725	7131737	13	Cyp9b1_7129808	>blimp-1	0.75	-	# GTGGTCAAAGTC	0.942814221	0.997896845	4004615385
chr2R	7531590	7531602	13	Cyt-b5_7533506	>blimp-1	0.83	+	# AAAGCGAAAGTG	0.276815223	0.997896845	2307461504
chr2R	11294682	11294694	13	dare_11293174	>blimp-1	0.78	+	# GAAGTCAAACTG	0.735302954	0.997896845	2603153906
chr2R	11294771	11294783	13	dare_11293174	>blimp-1	0.77	-	# GTAGCCAAAGAG	0.83555333	0.997896845	3655461506
chr2R	17018293	17018305	13	Dark_17020027	>blimp-1	0.79	+	# CAAGTGGAAGTG	0.572058087	0.997896845	200476926
chr2R	16855274	16855286	13	Dek_16856220	>blimp-1	0.78	-	# TTCGCGAAAGTG	0.735302954	0.997896845	3214615401
chr2R	17791500	17791512	13	Dhit_17792870	>blimp-1	0.8	+	# TCATTGAAAGTG	0.450375563	0.997896845	2081384626
chr2R	7996483	7996495	13	Dic3_7994968	>blimp-1	0.76	-	# GTGGAGAAAGTC	0.904056084	0.997896845	2494846167
chr2R	18128062	18128074	13	Dip3_18128494	>blimp-1	0.75	-	# GTAGAGGAAGGG	0.942814221	0.997896845	2063384637
chr2R	13943687	13943699	13	DJ-1alpha_13943377	>blimp-1	0.78	+	# TTAATGAAAGTT	0.735302954	0.997896845	2063461553
chr2R	23890000	23890012	13	DNA-ligI_23890512	>blimp-1	0.77	+	# GCTGTGAAAGGG	0.83555333	0.997896845	3794307726
chr2R	20697130	20697142	13	dpr_20698483	>blimp-1	0.76	+	# GTCCTGAAAGTT	0.904056084	0.997896845	2529230714
chr2R	9291406	9291418	13	Drep-2_9291857	>blimp-1	0.75	+	# GTCGTTAAAGCG	0.942814221	0.997896845	219800005
chr2R	11430841	11430853	13	Drip_11429645	>blimp-1	0.81	+	# AAAGTGAAACTG	0.374862293	0.997896845	2408307685
chr2R	11429615	11429627	13	Drip_11427803	>blimp-1	0.78	+	# GCAGCGAACGTG	0.735302954	0.997896845	2388999999
chr2R	7930471	7930483	13	drosha_7932429	>blimp-1	0.84	+	# GTAGCGAAAATG	0.236154231	0.997896845	3387307777
chr2R	22243018	22243030	13	dve_22243963	>blimp-1	0.76	-	# GTGGCGAAACTG	0.904056084	0.997896845	244984613
chr2R	24780205	24780217	13	Eap_24780917	>blimp-1	0.84	+	# GTAGTTAAAGTC	0.236154231	0.997896845	3007846135
chr2R	6747612	6747624	13	Eb1_6749227	>blimp-1	0.77	+	# GGAGAGGAAGTG	0.83555333	0.997896845	3065076906
chr2R	6747648	6747660	13	Eb1_6749227	>blimp-1	0.77	-	# GCAGTGCAAGTC	0.83555333	0.997896845	3233307634
chr2R	6132238	6132250	13	EcR_6131841	>blimp-1	0.79	+	# GAAATGAAAGCG	0.572058087	0.997896845	2765846184
chr2R	11889511	11889523	13	Ef1alpha48D_11891135	>blimp-1	0.77	+	# GTAATTAAAGTA	0.83555333	0.997896845	2321230746
chr2R	20239043	20239055	13	Efhc1.2_20239936	>blimp-1	0.78	+	# GAACTGATAGTG	0.735302954	0.997896845	2373384644
chr2R	20239049	20239061	13	Efhc1.2_20239936	>blimp-1	0.87	+	# ATAGTGAAAGTT	0.067100651	0.997896845	2382153867
chr2R	23386229	23386241	13	eIF2B-delta_23386521	>blimp-1	0.79	+	# GCGGAGAAAGTG	0.572058087	0.997896845	3326538512
chr2R	18627060	18627072	13	Eip55E_18627918	>blimp-1	0.84	-	# GTCGTTAAAGTG	0.236154231	0.997896845	2657692312
chr2R	24982511	24982523	13	emp_24981158	>blimp-1	0.76	+	# GTGGAAAAAGTG	0.904056084	0.997896845	3616923112
chr2R	19311149	19311161	13	EndoB_19310665	>blimp-1	0.75	+	# GTATTAAATGTG	0.942814221	0.997896845	290561544
chr2R	6777964	6777976	13	Epac_6776910	>blimp-1	0.79	+	# GAAATAAAAGTG	0.572058087	0.997896845	2083846156
chr2R	6789928	6789940	13	Epac_6789023	>blimp-1	0.77	+	# CTAATGAAAATG	0.83555333	0.997896845	27965385
chr2R	11450207	11450219	13	E(Pc)_11452043	>blimp-1	0.76	-	# GTAGTAAAAATT	0.904056084	0.997896845	2441846206
chr2R	24776900	24776912	13	Eps-15_24775265	>blimp-1	0.77	+	# CTACTGAAAATG	0.83555333	0.997896845	2169923118
chr2R	24776561	24776573	13	Eps-15_24775265	>blimp-1	0.81	+	# CAAGTCAAAGTG	0.374862293	0.997896845	3063230767
chr2R	24776080	24776092	13	Eps-15_24775265	>blimp-1	0.83	-	# GTAGTGATAGTT	0.276815223	0.997896845	2025076932
chr2R	7104809	7104821	13	esn_7106680	>blimp-1	0.76	-	# GTCGTAAAAGTT	0.904056084	0.997896845	3073692322
chr2R	9908991	9909003	13	Etf-QO_9910893	>blimp-1	0.79	-	# GCAGACAAAGTG	0.572058087	0.997896845	2495538444
chr2R	11290716	11290728	13	Fbl6_11289772	>blimp-1	0.78	+	# GAACTGATAGTG	0.735302954	0.997896845	2298692356
chr2R	24572309	24572321	13	Fcp1_24571821	>blimp-1	0.79	+	# GCTGCGAAAGTG	0.572058087	0.997896845	2946230801
chr2R	22866985	22866997	13	fd59A_22868159	>blimp-1	0.76	+	# TTGGTGAAAATG	0.904056084	0.997896845	2274615389
chr2R	12492080	12492092	13	fdl_12491379	>blimp-1	0.76	+	# GTAATGAAAATT	0.904056084	0.997896845	2326384673
chr2R	16264953	16264965	13	fidipidine_16264619	>blimp-1	0.77	-	# GACGTGAATGTG	0.83555333	0.997896845	2121307644
chr2R	21496110	21496122	13	Fkbp14_21495524	>blimp-1	0.86	+	# TTAGTGAAAGTT	0.119479219	0.997896845	3463153802
chr2R	21495982	21495994	13	Fkbp14_21495524	>blimp-1	0.75	-	# GTTTTGAAAGCG	0.942814221	0.997896845	2425461503
chr2R	23961572	23961584	13	Fmo-1_23962956	>blimp-1	0.75	-	# GTAGTGAAACAA	0.942814221	0.997896845	2214538483
chr2R	13229284	13229296	13	fsd_13230583	>blimp-1	0.84	-	# GTACAGAAAGTG	0.236154231	0.997896845	2740692289
chr2R	15678294	15678306	13	fus_15676669	>blimp-1	0.75	-	# GTAGTGCAAGGA	0.942814221	0.997896845	3091076913
chr2R	15678363	15678375	13	fus_15676669	>blimp-1	0.77	-	# CTCGTGAAAGTC	0.83555333	0.997896845	2005307677
chr2R	15509933	15509945	13	GalNAc-T1_15511812	>blimp-1	0.75	+	# GTGCTGAAAATG	0.942814221	0.997896845	2434000061
chr2R	23942615	23942627	13	Galphas_23943977	>blimp-1	0.77	+	# GTATTAAAAGTA	0.83555333	0.997896845	3121000038
chr2R	12324928	12324940	13	garz_12326360	>blimp-1	0.81	+	# AAAGTGAAAGTC	0.374862293	0.997896845	3929538491
chr2R	18583695	18583707	13	GEFmeso_18583317	>blimp-1	0.86	-	# GCGGTGAAAGTG	0.119479219	0.997896845	2024307716
chr2R	10125419	10125431	13	gem_10125496	>blimp-1	0.78	+	# GGATTAAAAGTG	0.735302954	0.997896845	3089538517
chr2R	22890176	22890188	13	Gmer_22888857	>blimp-1	0.78	+	# GAACTGAAAGAG	0.735302954	0.997896845	3636384554
chr2R	5758899	5758911	13	Gp210_5760862	>blimp-1	0.78	+	# GAAGTGACAGTC	0.735302954	0.997896845	3219846127
chr2R	15202444	15202456	13	GPHR_15201200	>blimp-1	0.76	+	# GTAGTTAAAATA	0.904056084	0.997896845	2394307737
chr2R	15863179	15863191	13	Gpo-1_15862020	>blimp-1	0.8	+	# CAAGTGAAACTG	0.450375563	0.997896845	2284846118
chr2R	10361686	10361698	13	Gr47a_10362185	>blimp-1	0.75	+	# GTAATAAAAATG	0.942814221	0.997896845	3344076922
chr2R	21975420	21975432	13	Gr58c_21976662	>blimp-1	0.77	-	# TTAGCGAATGTG	0.83555333	0.997896845	2123692311
chr2R	23105839	23105851	13	Gr59d_23105169	>blimp-1	0.76	-	# TTAGTGAAAGAC	0.904056084	0.997896845	2401461518
chr2R	21013416	21013428	13	grau_21011921	>blimp-1	0.75	-	# GTCGTTAAAGTC	0.942814221	0.997896845	2845615426
chr2R	17799210	17799222	13	grh_17801132	>blimp-1	0.76	-	# GCAGTGATATTG	0.904056084	0.997896845	2623076911
chr2R	17813151	17813163	13	grh_17814344	>blimp-1	0.82	-	# AAAGTGAAAGTA	0.316875313	0.997896845	319484619
chr2R	21755584	21755596	13	Grx-1_21757345	>blimp-1	0.76	+	# GTAGACAAATTG	0.904056084	0.997896845	3156769211
chr2R	25052954	25052966	13	gsb-n_25052331	>blimp-1	0.76	+	# GTGCTGAAAGTA	0.904056084	0.997896845	2825923089
chr2R	25054005	25054017	13	gsb-n_25052331	>blimp-1	0.76	-	# GTATTGACAGTT	0.904056084	0.997896845	3441923105
chr2R	9121577	9121589	13	GstE13_9122125	>blimp-1	0.79	-	# ATAGTTAAAGTA	0.572058087	0.997896845	2681692343
chr2R	13238621	13238633	13	GstE14_13239729	>blimp-1	0.78	-	# GCAGAGAAACTG	0.735302954	0.997896845	2948307691
chr2R	18406341	18406353	13	GstE7_18406924	>blimp-1	0.78	-	# GGATTCAAAGTG	0.735302954	0.997896845	2240999958
chr2R	9604672	9604684	13	GstT1_9605988	>blimp-1	0.84	-	# GGAGTGAATGTG	0.236154231	0.997896845	2547230709
chr2R	15010582	15010594	13	hbs_15011396	>blimp-1	0.75	-	# GTTATGAAAGTA	0.942814221	0.997896845	3182307684
chr2R	9832962	9832974	13	hebe_9831356	>blimp-1	0.8	-	# GAAAAGAAAGTG	0.450375563	0.997896845	290407692
chr2R	20619396	20619408	13	Hil_20618217	>blimp-1	0.75	+	# GTAGGCGAAGTG	0.942814221	0.997896845	2877846198
chr2R	17755667	17755679	13	HLH54F_17757405	>blimp-1	0.75	-	# GTAGTGAATGCT	0.942814221	0.997896845	3013538445
chr2R	21703353	21703365	13	HmgZ_21702830	>blimp-1	0.87	-	# ATATTGAAAGTG	0.067100651	0.997896845	2534076972
chr2R	23314365	23314377	13	HP1Lcsd_23313854	>blimp-1	0.76	-	# GTTGGAAAAGTG	0.904056084	0.997896845	2259615412
chr2R	19176738	19176750	13	hppy_19178738	>blimp-1	0.78	+	# GAACTGTAAGTG	0.735302954	0.997896845	4624769289
chr2R	10229743	10229755	13	Hr46_10227957	>blimp-1	0.8	-	# AAAGTGATAGTG	0.450375563	0.997896845	3123615338
chr2R	18717053	18717065	13	Hs3st-A_18718114	>blimp-1	0.77	-	# GTATGGAAATTG	0.83555333	0.997896845	3373230861
chr2R	6674455	6674467	13	Hsepi_6673372	>blimp-1	0.77	+	# GTAGGCAAAGTA	0.83555333	0.997896845	3253615418
chr2R	6674446	6674458	13	Hsepi_6673372	>blimp-1	0.75	+	# GTAGTTAATGTA	0.942814221	0.997896845	3381461576
chr2R	18135941	18135953	13	Hsf_18134634	>blimp-1	0.75	+	# GTGTTGCAAGTG	0.942814221	0.997896845	2062307698
chr2R	20255674	20255686	13	Hsl_20257650	>blimp-1	0.77	+	# GTAGAAAAAGTA	0.83555333	0.997896845	4196846153
chr2R	23365797	23365809	13	Ice1_23366866	>blimp-1	0.76	+	# TTGGTGAAAATG	0.904056084	0.997896845	2330230805
chr2R	15163663	15163675	13	igl_15164920	>blimp-1	0.81	-	# AAAGTGAAAGTC	0.374862293	0.997896845	2105923077
chr2R	14274405	14274417	13	Ih_14276130	>blimp-1	0.78	+	# GAAGTGAAAACG	0.735302954	0.997896845	2150999998
chr2R	14275876	14275888	13	Ih_14276130	>blimp-1	0.95	-	# GCAGTGAAAGTG	0.004206309	0.997896845	3239769307
chr2R	14286810	14286822	13	Ih_14288137	>blimp-1	0.77	+	# GGAGCGAGAGTG	0.83555333	0.997896845	202592308
chr2R	14290992	14291004	13	Ih_14291290	>blimp-1	0.81	-	# AAAATGAAAGTG	0.374862293	0.997896845	2624307669
chr2R	22859093	22859105	13	inaD_22858794	>blimp-1	0.81	+	# ACAGTGAAAGTT	0.374862293	0.997896845	2852538462
chr2R	20874311	20874323	13	Ipk1_20874695	>blimp-1	0.78	+	# GCTTTGAAAGTG	0.735302954	0.997896845	3728153907
chr2R	15204301	15204313	13	Ir51a_15204654	>blimp-1	0.78	+	# TTATTCAAAGTG	0.735302954	0.997896845	2273999989
chr2R	15203772	15203784	13	Ir51a_15204654	>blimp-1	0.81	-	# CCAGTGAAAGTA	0.374862293	0.997896845	2478769268
chr2R	15206973	15206985	13	Ir51b_15207993	>blimp-1	0.75	+	# GGCGTGATAGTG	0.942814221	0.997896845	2407076865
chr2R	15207687	15207699	13	Ir51b_15207993	>blimp-1	0.77	-	# GAAGTGAATATG	0.83555333	0.997896845	2364000005
chr2R	19507476	19507488	13	Ir56b_19508167	>blimp-1	0.77	-	# ATAATGAAACTG	0.83555333	0.997896845	2204153883
chr2R	12635654	12635666	13	Iswi_12636671	>blimp-1	0.81	-	# AAAGTGAAAGGG	0.374862293	0.997896845	274153847
chr2R	23555502	23555514	13	ItgalphaPS5_23556672	>blimp-1	0.82	+	# GTTGTGGAAGTG	0.316875313	0.997896845	3931384614
chr2R	18762216	18762228	13	Jabba_18761082	>blimp-1	0.77	-	# GATGTGTAAGTG	0.83555333	0.997896845	2826230755
chr2R	22738457	22738469	13	jbug_22737045	>blimp-1	0.8	-	# ATATCGAAAGTG	0.450375563	0.997896845	2043846125
chr2R	12119071	12119083	13	jeb_12118853	>blimp-1	0.77	+	# GGAGTGAAATTC	0.83555333	0.997896845	2182153818
chr2R	18856655	18856667	13	Jheh1_18855087	>blimp-1	0.75	+	# GTGGCGCAAGTG	0.942814221	0.997896845	2050076952
chr2R	11339844	11339856	13	kappaTry_11338733	>blimp-1	0.76	+	# ATAGTGACAGCG	0.904056084	0.997896845	2007538409
chr2R	23905969	23905981	13	kcc_23907654	>blimp-1	0.78	+	# GAAGTGAAACTC	0.735302954	0.997896845	4184230768
chr2R	10154992	10155004	13	KCNQ_10154877	>blimp-1	0.75	+	# GTCGTAAAAATG	0.942814221	0.997896845	2843615424
chr2R	10154921	10154933	13	KCNQ_10154877	>blimp-1	0.76	+	# GTTTTGAAAGTC	0.904056084	0.997896845	3178384607
chr2R	13199347	13199359	13	Kdm4B_13198337	>blimp-1	0.78	-	# GAGGTGAAAGAG	0.735302954	0.997896845	2823769195
chr2R	17555181	17555193	13	Klp54D_17557031	>blimp-1	0.79	+	# GCAGTGAAAGCA	0.572058087	0.997896845	2262769245
chr2R	6809264	6809276	13	koi_6811021	>blimp-1	0.77	+	# GGAGTAAAAGTC	0.83555333	0.997896845	2587000003
chr2R	23686673	23686685	13	l(2)efl_23685543	>blimp-1	0.84	-	# GTAGTGAAAGCT	0.236154231	0.997896845	2316384591
chr2R	23705782	23705794	13	l(2)tid_23707081	>blimp-1	0.78	+	# GAACTGATAGTG	0.735302954	0.997896845	4284846163
chr2R	23705019	23705031	13	l(2)tid_23706913	>blimp-1	0.76	-	# CTACTGGAAGTG	0.904056084	0.997896845	2067769232
chr2R	11335301	11335313	13	lambdaTry_11336840	>blimp-1	0.77	+	# GTGGCGAAAGTT	0.83555333	0.997896845	3166923097
chr2R	11336120	11336132	13	lambdaTry_11336840	>blimp-1	0.76	-	# GTATTAAAATTG	0.904056084	0.997896845	2531846166
chr2R	21719254	21719266	13	LBR_21720734	>blimp-1	0.8	+	# CGAGGGAAAGTG	0.450375563	0.997896845	3174615337
chr2R	9816100	9816112	13	lectin-46Ca_9817300	>blimp-1	0.82	-	# GTGGTGGAAGTG	0.316875313	0.997896845	2719076867
chr2R	17430133	17430145	13	Lhr_17431032	>blimp-1	0.75	+	# GTCGTGAAAGGA	0.942814221	0.997896845	215684615
chr2R	8912665	8912677	13	lin_8914524	>blimp-1	0.84	+	# GTGGTGAAAGTT	0.236154231	0.997896845	3535384609
chr2R	8913300	8913312	13	lin_8914524	>blimp-1	0.89	+	# AAAGTGAAAGTG	0.030245368	0.997896845	2022076935
chr2R	18731684	18731696	13	List_18730281	>blimp-1	0.77	-	# TTAATTAAAGTG	0.83555333	0.997896845	309892306
chr2R	10544291	10544303	13	lola_10543291	>blimp-1	0.75	+	# AAATTGAAAGTT	0.942814221	0.997896845	2179384594
chr2R	20645817	20645829	13	Lrt_20646360	>blimp-1	0.75	-	# GTAGCGCAAATG	0.942814221	0.997896845	3001076889
chr2R	21171145	21171157	13	LSm1_21170672	>blimp-1	0.77	+	# GTACGGAAAGTA	0.83555333	0.997896845	3756461563
chr2R	21171352	21171364	13	LSm1_21170672	>blimp-1	0.78	-	# ATCGAGAAAGTG	0.735302954	0.997896845	3472769253
chr2R	9840437	9840449	13	Lsm11_9839500	>blimp-1	0.77	+	# ATAGGGATAGTG	0.83555333	0.997896845	2395692352
chr2R	21143010	21143022	13	Magi_21142261	>blimp-1	0.83	+	# GTAGGGAATGTG	0.276815223	0.997896845	2577923101
chr2R	21144116	21144128	13	Magi_21142261	>blimp-1	0.79	-	# GAGGAGAAAGTG	0.572058087	0.997896845	3523615421
chr2R	21141645	21141657	13	Magi_21139795	>blimp-1	0.75	+	# AAATGGAAAGTG	0.942814221	0.997896845	3641384694
chr2R	21141520	21141532	13	Magi_21139795	>blimp-1	0.78	+	# ATTTTGAAAGTG	0.735302954	0.997896845	2188692311
chr2R	21141042	21141054	13	Magi_21139795	>blimp-1	0.86	+	# GCAGTGAAATTG	0.119479219	0.997896845	3340000032
chr2R	8458828	8458840	13	Mal-A3_8457892	>blimp-1	0.76	+	# CTAGTCCAAGTG	0.904056084	0.997896845	2108153851
chr2R	8463195	8463207	13	Mal-A6_8465158	>blimp-1	0.77	-	# GTAGCCAAAGTC	0.83555333	0.997896845	2976923105
chr2R	8472957	8472969	13	Mal-A7_8471663	>blimp-1	0.78	+	# GAAGGGTAAGTG	0.735302954	0.997896845	2492076958
chr2R	8470641	8470653	13	Mal-A8_8471954	>blimp-1	0.79	+	# GAAGTTAAAGGG	0.572058087	0.997896845	3829230807
chr2R	8471361	8471373	13	Mal-A8_8471954	>blimp-1	0.77	+	# GTAGCCAAAGTC	0.83555333	0.997896845	3480538485
chr2R	8471383	8471395	13	Mal-A8_8471954	>blimp-1	0.86	+	# GAAGTGAAAATG	0.119479219	0.997896845	2739153876
chr2R	14031163	14031175	13	mam_14031663	>blimp-1	0.76	-	# GTCATGAAAGTT	0.904056084	0.997896845	3347615467
chr2R	13989305	13989317	13	mam_13991203	>blimp-1	0.76	+	# GTCGCGAAACTG	0.904056084	0.997896845	312238462
chr2R	7674937	7674949	13	mRpL52_7674400	>blimp-1	0.76	+	# GTTCTGAAAGTT	0.904056084	0.997896845	2766846187
chr2R	24174945	24174957	13	mRpS17_24174441	>blimp-1	0.76	-	# GTAGATAAAATG	0.904056084	0.997896845	2206846162
chr2R	24175487	24175499	13	mRpS17_24174441	>blimp-1	0.75	-	# GTATTGACAGGG	0.942814221	0.997896845	3324538407
chr2R	17426557	17426569	13	Mtap_17427953	>blimp-1	0.76	-	# CTGGTGGAAGTG	0.904056084	0.997896845	3369769295
chr2R	11851849	11851861	13	Mtor_11852617	>blimp-1	0.75	-	# GTAGTAATAGTA	0.942814221	0.997896845	2222538451
chr2R	7793142	7793154	13	mus205_7793625	>blimp-1	0.8	-	# AGAGTAAAAGTG	0.450375563	0.997896845	2033769243
chr2R	12633736	12633748	13	muskelin_12632281	>blimp-1	0.84	-	# CTAGTGAAGGTG	0.236154231	0.997896845	2481538431
chr2R	16655432	16655444	13	Nach_16655046	>blimp-1	0.79	+	# ATAGCGAAAGAG	0.572058087	0.997896845	2568615409
chr2R	24890254	24890266	13	NaCP60E_24891614	>blimp-1	0.75	+	# GTAGTTAAGGTA	0.942814221	0.997896845	2375307745
chr2R	12914586	12914598	13	NAT1_12915994	>blimp-1	0.79	+	# GAGTTGAAAGTG	0.572058087	0.997896845	3342615366
chr2R	12916274	12916286	13	NAT1_12917858	>blimp-1	0.75	+	# GTAGTGAAATCA	0.942814221	0.997896845	2077153833
chr2R	12663379	12663391	13	nemy_12661750	>blimp-1	0.81	+	# AAAGTGAAAGAG	0.374862293	0.997896845	3467384577
chr2R	12661862	12661874	13	nemy_12661750	>blimp-1	0.75	+	# GTGATGAAATTG	0.942814221	0.997896845	2452615426
chr2R	24880371	24880383	13	NKAIN_24881570	>blimp-1	0.83	-	# GTAGTAAAAATG	0.276815223	0.997896845	3157999961
chr2R	24174066	24174078	13	Nop60B_24174877	>blimp-1	0.76	-	# GTGGAAAAAGTG	0.904056084	0.997896845	3313692361
chr2R	9580219	9580231	13	Not1_9579007	>blimp-1	0.76	-	# CTGGTGAAACTG	0.904056084	0.997896845	2179076888
chr2R	24039312	24039324	13	Not11_24037708	>blimp-1	0.83	-	# GTAATGAAACTG	0.276815223	0.997896845	2832923065
chr2R	13159636	13159648	13	Nrk_13160063	>blimp-1	0.78	+	# GAAGTGATAGTT	0.735302954	0.997896845	2211769199
chr2R	17569724	17569736	13	Ns2_17568456	>blimp-1	0.78	+	# GAAGTCAAAGAG	0.735302954	0.997896845	2373923116
chr2R	9863933	9863945	13	Ntmt_9865632	>blimp-1	0.79	-	# ATAGTAAAAGTA	0.572058087	0.997896845	2914615418
chr2R	7989508	7989520	13	Nup44A_7989859	>blimp-1	0.78	-	# GAAGAGTAAGTG	0.735302954	0.997896845	3325000064
chr2R	12432715	12432727	13	Nup54_12431099	>blimp-1	0.77	-	# GAAGTGAGATTG	0.83555333	0.997896845	2013692325
chr2R	16342500	16342512	13	Nup62_16344484	>blimp-1	0.75	+	# GTTGGGAAAGCG	0.942814221	0.997896845	2556692329
chr2R	24562754	24562766	13	Nurf-38_24561053	>blimp-1	0.87	+	# GCAGAGAAAGTG	0.067100651	0.997896845	3029692297
chr2R	24562679	24562691	13	Nurf-38_24561053	>blimp-1	0.77	+	# GTCGCAAAAGTG	0.83555333	0.997896845	3653000003
chr2R	24562768	24562780	13	Nurf-38_24561053	>blimp-1	0.77	-	# GGAGGGTAAGTG	0.83555333	0.997896845	3487153851
chr2R	24274346	24274358	13	nvy_24275734	>blimp-1	0.76	+	# GTAGTAAAAGAA	0.904056084	0.997896845	2860538464
chr2R	22229043	22229055	13	Oatp58Dc_22228574	>blimp-1	0.79	-	# GAACTCAAAGTG	0.572058087	0.997896845	2973307688
chr2R	10908897	10908909	13	Obp47a_10909923	>blimp-1	0.84	+	# GTAATCAAAGTG	0.236154231	0.997896845	3991538497
chr2R	14372625	14372637	13	Obp50a_14371116	>blimp-1	0.77	+	# TTATTGAAAATG	0.83555333	0.997896845	2530846199
chr2R	15026722	15026734	13	Obp51a_15024839	>blimp-1	0.77	+	# TTATTGAAAGCG	0.83555333	0.997896845	2104692326
chr2R	19697271	19697283	13	Obp56a_19697723	>blimp-1	0.75	+	# GTAGCGATAATG	0.942814221	0.997896845	2907923092
chr2R	19697115	19697127	13	Obp56a_19697723	>blimp-1	0.85	-	# GTATTGAAAGTT	0.170255383	0.997896845	2965615433
chr2R	19704139	19704151	13	Obp56d_19703915	>blimp-1	0.77	-	# ATAATGTAAGTG	0.83555333	0.997896845	2259615417
chr2R	19813922	19813934	13	Obp56h_19815554	>blimp-1	0.78	-	# GAAGTAAAACTG	0.735302954	0.997896845	3260692321
chr2R	20503245	20503257	13	Obp57a_20505150	>blimp-1	0.78	-	# GCAGTGAAATTC	0.735302954	0.997896845	3392692364
chr2R	8006016	8006028	13	Odc2_8007246	>blimp-1	0.75	-	# GTCGGGAAAATG	0.942814221	0.997896845	2324999938
chr2R	14235909	14235921	13	Opa1_14235449	>blimp-1	0.75	+	# GTAGCGTAATTG	0.942814221	0.997896845	2573615348
chr2R	23966483	23966495	13	or_23967939	>blimp-1	0.78	+	# CTAAAGAAAGTG	0.735302954	0.997896845	3195153866
chr2R	7924417	7924429	13	Or43b_7922604	>blimp-1	0.83	-	# GTAGTCGAAGTG	0.276815223	0.997896845	3775153922
chr2R	9344596	9344608	13	Or45a_9345349	>blimp-1	0.77	+	# GCAGTTAAGGTG	0.83555333	0.997896845	2690384622
chr2R	19772430	19772442	13	Or56a_19771233	>blimp-1	0.79	-	# ATATTGAAAGTC	0.572058087	0.997896845	3884307715
chr2R	23276315	23276327	13	ord_23275536	>blimp-1	0.76	-	# GTTGCCAAAGTG	0.904056084	0.997896845	325284614
chr2R	12026458	12026470	13	otk2_12025272	>blimp-1	0.78	-	# ATAGTCAAAGAG	0.735302954	0.997896845	3044999957
chr2R	20904946	20904958	13	otp_20903414	>blimp-1	0.75	-	# ATAGTGACTGTG	0.942814221	0.997896845	2927846208
chr2R	20897636	20897648	13	otp_20897584	>blimp-1	0.76	-	# GTAACGAACGTG	0.904056084	0.997896845	2152461532
chr2R	20898184	20898196	13	otp_20897584	>blimp-1	0.8	-	# AAAGTGAAGGTG	0.450375563	0.997896845	2536846182
chr2R	17635478	17635490	13	Oxp_17634167	>blimp-1	0.77	-	# GGAATAAAAGTG	0.83555333	0.997896845	2494846156
chr2R	18140819	18140831	13	pAbp_18141375	>blimp-1	0.75	-	# GTGCTGAAAGCG	0.942814221	0.997896845	2710230772
chr2R	9959477	9959489	13	Pal1_9960078	>blimp-1	0.77	-	# CTAGTCAAAATG	0.83555333	0.997896845	2573615374
chr2R	23688089	23688101	13	Pal2_23688189	>blimp-1	0.86	+	# GCAGTGAAAGCG	0.119479219	0.997896845	2241999988
chr2R	8927296	8927308	13	PAN2_8928169	>blimp-1	0.8	-	# AAAGTGGAAGTG	0.450375563	0.997896845	2866923032
chr2R	17536686	17536698	13	Patronin_17535866	>blimp-1	0.78	+	# GATCTGAAAGTG	0.735302954	0.997896845	2205615367
chr2R	18134285	18134297	13	Pcl_18135426	>blimp-1	0.79	+	# GATGTGAAAGTT	0.572058087	0.997896845	2274153885
chr2R	14979410	14979422	13	pcs_14981263	>blimp-1	0.78	+	# GGAGTGAAAGCA	0.735302954	0.997896845	2441923089
chr2R	14979437	14979449	13	pcs_14981263	>blimp-1	0.77	+	# GCGGTGGAAGTG	0.83555333	0.997896845	2053461524
chr2R	14980578	14980590	13	pcs_14981263	>blimp-1	0.77	+	# TTAGTGAAAATT	0.83555333	0.997896845	2741076937
chr2R	23659902	23659914	13	Pde8_23660372	>blimp-1	0.77	+	# GCAGTAAATGTG	0.83555333	0.997896845	2341692301
chr2R	23675096	23675108	13	Pde8_23676805	>blimp-1	0.75	+	# GTATTCACAGTG	0.942814221	0.997896845	2507538475
chr2R	8386789	8386801	13	pdm3_8387370	>blimp-1	0.8	-	# GAAGGTAAAGTG	0.450375563	0.997896845	2462538497
chr2R	10109278	10109290	13	Pfk_10109740	>blimp-1	0.76	+	# GTATTGAAAGAA	0.904056084	0.997896845	2469230734
chr2R	10109487	10109499	13	Pfk_10109740	>blimp-1	0.77	+	# ATTGTGAAACTG	0.83555333	0.997896845	2018692324
chr2R	7063468	7063480	13	pgant3_7061732	>blimp-1	0.78	+	# GCATTGAAGGTG	0.735302954	0.997896845	2426076932
chr2R	22328610	22328622	13	pgc_22330200	>blimp-1	0.76	+	# GTTGAAAAAGTG	0.904056084	0.997896845	2176615404
chr2R	22328706	22328718	13	pgc_22330200	>blimp-1	0.86	+	# TTAGCGAAAGTG	0.119479219	0.997896845	2000384636
chr2R	8914743	8914755	13	Pgi_8913886	>blimp-1	0.78	-	# GCAGTGAAACTC	0.735302954	0.997896845	2480846141
chr2R	6740031	6740043	13	phtf_6741899	>blimp-1	0.76	-	# CTGGTGTAAGTG	0.904056084	0.997896845	4008769205
chr2R	6739906	6739918	13	phtf_6741899	>blimp-1	0.78	-	# CTAGTGAAAATT	0.735302954	0.997896845	3768153906
chr2R	14433679	14433691	13	phyl_14432337	>blimp-1	0.84	+	# GTAGTAAAAGTA	0.236154231	0.997896845	2755923097
chr2R	16665766	16665778	13	Picot_16663960	>blimp-1	0.79	-	# GCATTAAAAGTG	0.572058087	0.997896845	2301538467
chr2R	22874753	22874765	13	PIP5K59B_22874769	>blimp-1	0.86	+	# GCAGTGAAAATG	0.119479219	0.997896845	3418076882
chr2R	23552832	23552844	13	pita_23551551	>blimp-1	0.8	+	# GAAGAGAAAGTC	0.450375563	0.997896845	3055384544
chr2R	9274226	9274238	13	Pkn_9272672	>blimp-1	0.76	-	# GTAGCGTAAGTA	0.904056084	0.997896845	2149
chr2R	9287024	9287036	13	Pkn_9285097	>blimp-1	0.76	+	# GTGAAGAAAGTG	0.904056084	0.997896845	3414076894
chr2R	9285436	9285448	13	Pkn_9285097	>blimp-1	0.78	-	# GAAATGACAGTG	0.735302954	0.997896845	3597615391
chr2R	18709523	18709535	13	pncr016:2R_18711391	>blimp-1	0.76	+	# GTCGGCAAAGTG	0.904056084	0.997896845	3508999987
chr2R	8235585	8235597	13	pnut_8237271	>blimp-1	0.75	-	# TTAGTGCAAATG	0.942814221	0.997896845	2300076874
chr2R	10903441	10903453	13	polyph_10903570	>blimp-1	0.78	+	# GAATTGAATGTG	0.735302954	0.997896845	3118076875
chr2R	22043549	22043561	13	PpD5_22042945	>blimp-1	0.76	+	# GTATTCAAAATG	0.904056084	0.997896845	3121076932
chr2R	22043371	22043383	13	PpD5_22042945	>blimp-1	0.77	+	# GTAGCCAAAATG	0.83555333	0.997896845	208899999
chr2R	22044031	22044043	13	PpD5_22042945	>blimp-1	0.75	-	# GTAATTAAATTG	0.942814221	0.997896845	3601615374
chr2R	22044042	22044054	13	PpD5_22042945	>blimp-1	0.77	-	# GTGGCCAAAGTG	0.83555333	0.997896845	2572153862
chr2R	22426489	22426501	13	ppk12_22427479	>blimp-1	0.75	+	# GTAGATACAGTG	0.942814221	0.997896845	318030766
chr2R	9046132	9046144	13	PPO2_9044709	>blimp-1	0.93	+	# GTAGTGAAAGTT	0.010415623	0.997896845	2460307731
chr2R	7829813	7829825	13	Prosalpha1_7828678	>blimp-1	0.77	+	# GCGGTGAAAATG	0.83555333	0.997896845	2336615355
chr2R	9849457	9849469	13	Prosalpha7_9847836	>blimp-1	0.75	+	# ATAGTGGACGTG	0.942814221	0.997896845	2436076919
chr2R	10818490	10818502	13	Prosbeta5_10819978	>blimp-1	0.77	+	# ATACTGAAATTG	0.83555333	0.997896845	2668846137
chr2R	10818541	10818553	13	Prosbeta5_10819978	>blimp-1	0.77	-	# ATAATGTAAGTG	0.83555333	0.997896845	3205615447
chr2R	12164442	12164454	13	Prp8_12162998	>blimp-1	0.77	+	# GTACGTAAAGTG	0.83555333	0.997896845	2037692272
chr2R	10581928	10581940	13	psq_10583686	>blimp-1	0.8	-	# ACAGTGAAATTG	0.450375563	0.997896845	2652230822
chr2R	10569620	10569632	13	psq_10569954	>blimp-1	0.75	+	# GTAGTAAAAAGG	0.942814221	0.997896845	2450923085
chr2R	10566965	10566977	13	psq_10568942	>blimp-1	0.79	-	# AGAATGAAAGTG	0.572058087	0.997896845	315569222
chr2R	7281782	7281794	13	pwn_7282572	>blimp-1	0.79	-	# CCAGTGAAATTG	0.572058087	0.997896845	3216384642
chr2R	22563711	22563723	13	px_22562065	>blimp-1	0.77	+	# TTCGAGAAAGTG	0.83555333	0.997896845	2543615371
chr2R	11710542	11710554	13	pyr_11712263	>blimp-1	0.75	-	# GTGATGAAATTG	0.942814221	0.997896845	2356000013
chr2R	17468893	17468905	13	qkr54B_17469624	>blimp-1	0.78	+	# GAAGTGCAAGTC	0.735302954	0.997896845	4074000035
chr2R	22413232	22413244	13	qkr58E-3_22411545	>blimp-1	0.77	+	# CTCGTGAAAGCG	0.83555333	0.997896845	3135769243
chr2R	20583222	20583234	13	qsm_20582132	>blimp-1	0.76	+	# GGTGTGAAATTG	0.904056084	0.997896845	3355923093
chr2R	6695743	6695755	13	Rab2_6696739	>blimp-1	0.78	+	# ATGGTGAAAGTA	0.735302954	0.997896845	4276230789
chr2R	14154265	14154277	13	Rcd1_14152708	>blimp-1	0.82	-	# AAAGTGAAAGTA	0.316875313	0.997896845	3177153841
chr2R	19491034	19491046	13	Rep_19492087	>blimp-1	0.75	+	# GTAGAGAAACAG	0.942814221	0.997896845	3451769201
chr2R	23631569	23631581	13	retn_23632610	>blimp-1	0.76	+	# TTAGTGAAAATC	0.904056084	0.997896845	3738076944
chr2R	23644387	23644399	13	retn_23646193	>blimp-1	0.76	-	# TTAATGAAAGAG	0.904056084	0.997896845	2731846189
chr2R	19326704	19326716	13	Rgk1_19325496	>blimp-1	0.8	+	# GCAGCGAAAGTA	0.450375563	0.997896845	2958461591
chr2R	19327150	19327162	13	Rgk1_19325496	>blimp-1	0.8	-	# GAAGGAAAAGTG	0.450375563	0.997896845	2954307766
chr2R	21253854	21253866	13	Rgk3_21255798	>blimp-1	0.76	+	# TTAGTGAAAAGG	0.904056084	0.997896845	2707692321
chr2R	9179063	9179075	13	Rme-8_9177261	>blimp-1	0.78	+	# GCCCTGAAAGTG	0.735302954	0.997896845	3273846128
chr2R	11679845	11679857	13	Roc2_11679354	>blimp-1	0.76	+	# ATAGTGATAATG	0.904056084	0.997896845	2132307696
chr2R	11681298	11681310	13	Roc2_11679354	>blimp-1	0.76	-	# GTTGAAAAAGTG	0.904056084	0.997896845	2132153876
chr2R	19440359	19440371	13	RpL11_19442342	>blimp-1	0.83	+	# GTAGTCAAGGTG	0.276815223	0.997896845	3662307725
chr2R	24905108	24905120	13	RpL41_24903935	>blimp-1	0.76	+	# GTTGTCAAAGTT	0.904056084	0.997896845	4268153862
chr2R	20262359	20262371	13	RpS18_20264070	>blimp-1	0.76	+	# ATGGTGACAGTG	0.904056084	0.997896845	3091307705
chr2R	20262719	20262731	13	RpS18_20264070	>blimp-1	0.77	+	# ATATTGAATGTG	0.83555333	0.997896845	2214999931
chr2R	22643339	22643351	13	RpS24_22641419	>blimp-1	0.77	+	# GGAGCGAATGTG	0.83555333	0.997896845	212615384
chr2R	7654823	7654835	13	Rpt1_7653954	>blimp-1	0.85	-	# GGAGTGAAAGCG	0.170255383	0.997896845	2146615342
chr2R	18877993	18878005	13	sano_18878391	>blimp-1	0.78	-	# GAAGTAAAACTG	0.735302954	0.997896845	2692769225
chr2R	18876803	18876815	13	sano_18878391	>blimp-1	0.76	-	# TTAATGAAAATG	0.904056084	0.997896845	361769237
chr2R	17757641	17757653	13	Sardh_17756422	>blimp-1	0.75	-	# GTTCTCAAAGTG	0.942814221	0.997896845	2374769209
chr2R	18289839	18289851	13	sbb_18288761	>blimp-1	0.75	+	# GTTTTGAAAATG	0.942814221	0.997896845	4138307718
chr2R	21482154	21482166	13	Sdc_21481176	>blimp-1	0.75	-	# TTTGTGAAAATG	0.942814221	0.997896845	2204692309
chr2R	9884092	9884104	13	Sec24AB_9882357	>blimp-1	0.77	+	# GAAGTGACAGCG	0.83555333	0.997896845	2975461566
chr2R	9883426	9883438	13	Sec24AB_9882357	>blimp-1	0.77	-	# GTATAGAAACTG	0.83555333	0.997896845	2134692304
chr2R	24047697	24047709	13	sei_24049203	>blimp-1	0.75	-	# GTGGGGAAACTG	0.942814221	0.997896845	2708076933
chr2R	24046684	24046696	13	sei_24047411	>blimp-1	0.77	-	# ATTGTGAAAGCG	0.83555333	0.997896845	2221538443
chr2R	14272642	14272654	13	SelD_14270658	>blimp-1	0.84	+	# GTCGCGAAAGTG	0.236154231	0.997896845	3006461533
chr2R	14272165	14272177	13	SelD_14270658	>blimp-1	0.75	-	# GTGTTGAAGGTG	0.942814221	0.997896845	2547538506
chr2R	17680076	17680088	13	Sema-1b_17679255	>blimp-1	0.77	+	# GGAGGGAAATTG	0.83555333	0.997896845	2092923041
chr2R	16385715	16385727	13	Sema-2b_16386524	>blimp-1	0.81	+	# TAAGTGAAAGTT	0.374862293	0.997896845	2078153848
chr2R	16746297	16746309	13	Sfp53D_16745114	>blimp-1	0.76	+	# ATTGTGAATGTG	0.904056084	0.997896845	2042692353
chr2R	16204480	16204492	13	shark_16202884	>blimp-1	0.76	-	# GAAGTGGAGGTG	0.904056084	0.997896845	2861615394
chr2R	13926970	13926982	13	shot_13925503	>blimp-1	0.75	-	# AAATGGAAAGTG	0.942814221	0.997896845	2692615415
chr2R	14307395	14307407	13	Shroom_14308142	>blimp-1	0.84	-	# GTATTGAAAGTC	0.236154231	0.997896845	2651615384
chr2R	17392816	17392828	13	Sip1_17394593	>blimp-1	0.76	+	# GTTTTGAAAGTT	0.904056084	0.997896845	2009230762
chr2R	12307021	12307033	13	SIP2_12306269	>blimp-1	0.75	-	# AAATGGAAAGTG	0.942814221	0.997896845	2949846167
chr2R	23460427	23460439	13	SkpF_23458759	>blimp-1	0.76	+	# TTATTGACAGTG	0.904056084	0.997896845	3096999957
chr2R	13596038	13596050	13	S-Lap5_13596677	>blimp-1	0.83	-	# GTATTGTAAGTG	0.276815223	0.997896845	422115375
chr2R	13780694	13780706	13	S-Lap7_13780245	>blimp-1	0.78	+	# CTAATAAAAGTG	0.735302954	0.997896845	2229538503
chr2R	24334631	24334643	13	slbo_24334307	>blimp-1	0.8	+	# AGAGTAAAAGTG	0.450375563	0.997896845	408484624
chr2R	24403210	24403222	13	slik_24402680	>blimp-1	0.77	-	# GTAAACAAAGTG	0.83555333	0.997896845	4128846159
chr2R	24403216	24403228	13	slik_24402680	>blimp-1	0.8	-	# AAAGTGATAGTG	0.450375563	0.997896845	430192314
chr2R	19567234	19567246	13	sm_19566167	>blimp-1	0.76	-	# ATAGTGAGAGAG	0.904056084	0.997896845	2710230795
chr2R	19567569	19567581	13	sm_19566167	>blimp-1	0.75	-	# GTAGTTATAGTT	0.942814221	0.997896845	2597615347
chr2R	23846247	23846259	13	Snap29_23844763	>blimp-1	0.77	+	# GTAGACAAAGTC	0.83555333	0.997896845	3084384673
chr2R	21335229	21335241	13	snmRNA:184_21335510	>blimp-1	0.78	+	# ATGATGAAAGTG	0.735302954	0.997896845	2304000011
chr2R	20945399	20945411	13	snoRNA:660_20945970	>blimp-1	0.83	-	# GTGGTGAAAGAG	0.276815223	0.997896845	4287153849
chr2R	10538601	10538613	13	snoRNA:lola-a_10536660	>blimp-1	0.78	+	# TTATTGAAAGTC	0.735302954	0.997896845	3704538382
chr2R	10537514	10537526	13	snoRNA:lola-a_10536660	>blimp-1	0.78	-	# GAAATGAAAATG	0.735302954	0.997896845	2228230765
chr2R	24249474	24249486	13	snoRNA:Me18S-A1597_24251269	>blimp-1	0.79	+	# GAAGAGAAAGGG	0.572058087	0.997896845	2122230715
chr2R	14620343	14620355	13	snoRNA:Me18S-C1366_14621782	>blimp-1	0.75	+	# TTAGTGTAATTG	0.942814221	0.997896845	2420615408
chr2R	17697989	17698001	13	snoRNA:Me28S-A1666a_17699932	>blimp-1	0.79	+	# CAAGTGAATGTG	0.572058087	0.997896845	3009076863
chr2R	21330064	21330076	13	snoRNA:Me28S-A2589c_21331573	>blimp-1	0.76	-	# GTAATTAAAGTC	0.904056084	0.997896845	3484692365
chr2R	14623587	14623599	13	snoRNA:Me28S-G2703b_14623764	>blimp-1	0.81	-	# ACAGGGAAAGTG	0.374862293	0.997896845	2019230774
chr2R	18142545	18142557	13	snoRNA:Psi18S-1347a_18142802	>blimp-1	0.87	-	# GCAGTGAAAGTT	0.067100651	0.997896845	2961000048
chr2R	21332238	21332250	13	snoRNA:Psi18S-1389a_21333934	>blimp-1	0.76	+	# GTAGCGAAAACG	0.904056084	0.997896845	2074692301
chr2R	21328510	21328522	13	snoRNA:Psi18S-841b_21330276	>blimp-1	0.78	+	# GATGTGAAAGAG	0.735302954	0.997896845	2776230814
chr2R	11589354	11589366	13	snoRNA:Psi28S-1936_11588331	>blimp-1	0.75	+	# GTAATCAAACTG	0.942814221	0.997896845	41516154
chr2R	22067754	22067766	13	Snp_22068275	>blimp-1	0.78	+	# GAAATGAAACTG	0.735302954	0.997896845	2303153785
chr2R	23977221	23977233	13	Sox14_23978801	>blimp-1	0.76	-	# CTAGTGAAAAAG	0.904056084	0.997896845	2013307697
chr2R	14212854	14212866	13	Sox15_14212413	>blimp-1	0.76	+	# TTTCTGAAAGTG	0.904056084	0.997896845	2075384576
chr2R	18653955	18653967	13	SP2637_18652776	>blimp-1	0.75	-	# GTGTTGAAAATG	0.942814221	0.997896845	3408000002
chr2R	18658842	18658854	13	SP2637_18658222	>blimp-1	0.81	-	# ACATTGAAAGTG	0.374862293	0.997896845	3226999964
chr2R	7440931	7440943	13	sPLA2_7442864	>blimp-1	0.78	+	# GCTATGAAAGTG	0.735302954	0.997896845	2349384622
chr2R	6882286	6882298	13	Spn42Db_6880770	>blimp-1	0.81	-	# TAAGGGAAAGTG	0.374862293	0.997896845	2495769194
chr2R	7146097	7146109	13	Spn43Aa_7147692	>blimp-1	0.87	+	# GCATTGAAAGTG	0.067100651	0.997896845	2286307702
chr2R	10942665	10942677	13	Spn47C_10941669	>blimp-1	0.78	+	# GAAATGAAATTG	0.735302954	0.997896845	3258923136
chr2R	17124903	17124915	13	Spn53F_17124237	>blimp-1	0.78	-	# CGAGTGGAAGTG	0.735302954	0.997896845	3293692277
chr2R	11398686	11398698	13	sprt_11397432	>blimp-1	0.77	+	# GGAGAGGAAGTG	0.83555333	0.997896845	2032615403
chr2R	19435913	19435925	13	Spt5_19437483	>blimp-1	0.83	+	# GTAGTCAATGTG	0.276815223	0.997896845	3345307703
chr2R	24756300	24756312	13	spz6_24757378	>blimp-1	0.76	-	# GTATTGCAAGTA	0.904056084	0.997896845	2600999978
chr2R	9745658	9745670	13	sqa_9745273	>blimp-1	0.75	+	# GTAGAAAATGTG	0.942814221	0.997896845	2225461546
chr2R	9747010	9747022	13	sqa_9745273	>blimp-1	0.77	-	# GATGTGAACGTG	0.83555333	0.997896845	2873769192
chr2R	9748270	9748282	13	sqa_9748121	>blimp-1	0.78	-	# GAAGTCAATGTG	0.735302954	0.997896845	2611846172
chr2R	15380603	15380615	13	SRPK_15381449	>blimp-1	0.77	-	# GGAGGGAAACTG	0.83555333	0.997896845	2787230758
chr2R	24500911	24500923	13	Ssl_24500267	>blimp-1	0.79	+	# TAAGTGAAAATG	0.572058087	0.997896845	380392302
chr2R	23679751	23679763	13	St1_23681623	>blimp-1	0.84	-	# GTAGTAAAAGGG	0.236154231	0.997896845	2730000005
chr2R	24694603	24694615	13	ST6Gal_24694386	>blimp-1	0.82	-	# AAAGTGAAAGTT	0.316875313	0.997896845	2374615361
chr2R	18124087	18124099	13	stau_18123873	>blimp-1	0.75	-	# GTTGAGAAAATG	0.942814221	0.997896845	3410461536
chr2R	12568697	12568709	13	stil_12570367	>blimp-1	0.77	-	# GGCCTGAAAGTG	0.83555333	0.997896845	2059230765
chr2R	15958091	15958103	13	Strn-Mlck_15956901	>blimp-1	0.76	+	# GTGGGTAAAGTG	0.904056084	0.997896845	2454615335
chr2R	15968480	15968492	13	Strn-Mlck_15968467	>blimp-1	0.75	-	# GTGGTGAAAATT	0.942814221	0.997896845	2676846151
chr2R	12928378	12928390	13	sug_12928860	>blimp-1	0.78	+	# GAAGTGCAAGTC	0.735302954	0.997896845	2203076923
chr2R	8086059	8086071	13	sut2_8087396	>blimp-1	0.75	-	# GTAGGGAATGGG	0.942814221	0.997896845	2890692284
chr2R	14619346	14619358	13	Su(var)2-HP2_14618118	>blimp-1	0.79	+	# GAGGTGAAAGTA	0.572058087	0.997896845	2624615422
chr2R	14619165	14619177	13	Su(var)2-HP2_14618118	>blimp-1	0.8	-	# AAAGTGTAAGTG	0.450375563	0.997896845	3353076916
chr2R	10254011	10254023	13	Syb_10252417	>blimp-1	0.77	+	# CTACTGAAAGTC	0.83555333	0.997896845	2896153856
chr2R	22333418	22333430	13	T3dh_22332072	>blimp-1	0.75	-	# GTCGAGAAAATG	0.942814221	0.997896845	2137846189
chr2R	10881079	10881091	13	Taf5_10879673	>blimp-1	0.75	+	# GTATTGAAATAG	0.942814221	0.997896845	3057230755
chr2R	24135471	24135483	13	tamo_24133551	>blimp-1	0.77	-	# CTGGTCAAAGTG	0.83555333	0.997896845	3499923007
chr2R	24133339	24133351	13	tamo_24131839	>blimp-1	0.77	+	# ATTGTGAAAGCG	0.83555333	0.997896845	2521384634
chr2R	18311151	18311163	13	Tango8_18311822	>blimp-1	0.75	+	# GTGGTTAAAATG	0.942814221	0.997896845	3872153869
chr2R	6690850	6690862	13	Tdc2_6689974	>blimp-1	0.79	+	# GCAATGAAAGTT	0.572058087	0.997896845	3095153858
chr2R	17469877	17469889	13	Tes_17469177	>blimp-1	0.89	-	# AAAGTGAAAGTG	0.030245368	0.997896845	3957769284
chr2R	23870521	23870533	13	Thiolase_23868603	>blimp-1	0.78	-	# CTAGTTAAAGTT	0.735302954	0.997896845	3755923088
chr2R	11755107	11755119	13	ths_11756817	>blimp-1	0.75	-	# GTAATAAAAATG	0.942814221	0.997896845	326423085
chr2R	18987213	18987225	13	tn_18987344	>blimp-1	0.79	+	# TACGTGAAAGTG	0.572058087	0.997896845	2535230766
chr2R	19826355	19826367	13	Toll-7_19826578	>blimp-1	0.78	-	# TGAGTGAAAGAG	0.735302954	0.997896845	227453846
chr2R	18970913	18970925	13	Topors_18972612	>blimp-1	0.76	+	# GTGGCGAAAATG	0.904056084	0.997896845	2659461618
chr2R	11606373	11606385	13	tou_11604936	>blimp-1	0.8	-	# CAAGTGAAATTG	0.450375563	0.997896845	3350846263
chr2R	24901289	24901301	13	Tpc2_24900734	>blimp-1	0.79	-	# CAAGTGGAAGTG	0.572058087	0.997896845	2416461575
chr2R	6636910	6636922	13	Trap1_6636262	>blimp-1	0.76	+	# TTCGTGAAACTG	0.904056084	0.997896845	2916615371
chr2R	21082429	21082441	13	Treh_21084335	>blimp-1	0.76	+	# ATGGTGAGAGTG	0.904056084	0.997896845	2147461497
chr2R	20001439	20001451	13	tRNA:CR30212_20000368	>blimp-1	0.87	+	# ATAGCGAAAGTG	0.067100651	0.997896845	3101692328
chr2R	20001216	20001228	13	tRNA:CR30212_20000368	>blimp-1	0.79	+	# TAAGTGGAAGTG	0.572058087	0.997896845	2449538449
chr2R	19725668	19725680	13	tRNA:CR30218_19725905	>blimp-1	0.77	-	# GCAGTGGAAGCG	0.83555333	0.997896845	3095769286
chr2R	18637611	18637623	13	tRNA:CR30227_18639557	>blimp-1	0.8	-	# GAAGGCAAAGTG	0.450375563	0.997896845	2229615427
chr2R	17391379	17391391	13	tRNA:CR30233_17392215	>blimp-1	0.76	+	# GTTGCAAAAGTG	0.904056084	0.997896845	2921153869
chr2R	16217761	16217773	13	tRNA:CR30239_16219638	>blimp-1	0.79	+	# GAAGTGAAACTA	0.572058087	0.997896845	2152076932
chr2R	19725915	19725927	13	tRNA:CR30452_19725691	>blimp-1	0.77	-	# GCAGTGGAAGCG	0.83555333	0.997896845	336676925
chr2R	11400316	11400328	13	tRNA:CR30506_11399841	>blimp-1	0.75	+	# GTAATCAAAATG	0.942814221	0.997896845	308076919
chr2R	11405998	11406010	13	tRNA:CR45107_11405303	>blimp-1	0.85	-	# CTAGTGAAAATG	0.170255383	0.997896845	2299692296
chr2R	18641739	18641751	13	tRNA:G3:55E_18639796	>blimp-1	0.84	-	# GTAGTTAAAGGG	0.236154231	0.997896845	4065615343
chr2R	20227510	20227522	13	tRNA:G3:56EFa_20229481	>blimp-1	0.82	+	# GTAGTGCAAGTC	0.316875313	0.997896845	3338230812
chr2R	21181756	21181768	13	tRNA:G3:57BCb_21182856	>blimp-1	0.76	+	# GGAGTGTAAGTA	0.904056084	0.997896845	4015384634
chr2R	9659902	9659914	13	tRNA:M3:46A_9661225	>blimp-1	0.79	+	# GCAATTAAAGTG	0.572058087	0.997896845	3855615377
chr2R	9660580	9660592	13	tRNA:M3:46A_9661225	>blimp-1	0.8	+	# ACTGTGAAAGTG	0.450375563	0.997896845	3738307659
chr2R	6190902	6190914	13	tRNA:N5:42Ae_6190202	>blimp-1	0.84	+	# GTGGTAAAAGTG	0.236154231	0.997896845	3137769257
chr2R	6154366	6154378	13	tRNA:N5:42Af_6153579	>blimp-1	0.84	+	# TTAGTGCAAGTG	0.236154231	0.997896845	3228923082
chr2R	10481582	10481594	13	trsn_10480111	>blimp-1	0.76	-	# GTATTGAAAGAA	0.904056084	0.997896845	2054692302
chr2R	7005524	7005536	13	Tsp42Ec_7006442	>blimp-1	0.76	-	# GTACTGAAAGGA	0.904056084	0.997896845	2252999959
chr2R	7010590	7010602	13	Tsp42Ee_7012485	>blimp-1	0.76	+	# GTACTGAAAGCA	0.904056084	0.997896845	2343076891
chr2R	7051886	7051898	13	Tsp42En_7052747	>blimp-1	0.77	+	# GTAATTAAAGTA	0.83555333	0.997896845	246707696
chr2R	7053231	7053243	13	Tsp42Eo_7054717	>blimp-1	0.77	+	# GGAGCGTAAGTG	0.83555333	0.997896845	2814846161
chr2R	7058069	7058081	13	Tsp42Ep_7057548	>blimp-1	0.77	+	# TTATTGAAATTG	0.83555333	0.997896845	3901461532
chr2R	7059372	7059384	13	Tsp42Ep_7057548	>blimp-1	0.78	-	# GTAGCTAAAGTT	0.735302954	0.997896845	3911538523
chr2R	11379321	11379333	13	Tsp47F_11379177	>blimp-1	0.79	-	# CGAGTGAAAGTC	0.572058087	0.997896845	2812076926
chr2R	24016101	24016113	13	Unc-89_24014254	>blimp-1	0.81	+	# CAAGGGAAAGTG	0.374862293	0.997896845	2675769241
chr2R	24564154	24564166	13	uri_24565554	>blimp-1	0.75	-	# TTGGTGAACGTG	0.942814221	0.997896845	3075153862
chr2R	9844330	9844342	13	Vamp7_9842502	>blimp-1	0.78	+	# GCCGTGAAAGTA	0.735302954	0.997896845	2447615376
chr2R	18912950	18912962	13	Vha100-3_18911895	>blimp-1	0.81	-	# AAAGTAAAAGTG	0.374862293	0.997896845	3895076862
chr2R	18913091	18913103	13	Vha100-3_18911895	>blimp-1	0.8	-	# GAATTGAAAGTT	0.450375563	0.997896845	3468923055
chr2R	18913106	18913118	13	Vha100-3_18911895	>blimp-1	0.75	-	# AAAGCAAAAGTG	0.942814221	0.997896845	2400615362
chr2R	18913612	18913624	13	Vha100-3_18911895	>blimp-1	0.82	-	# AAAGAGAAAGTG	0.316875313	0.997896845	3036615406
chr2R	11279098	11279110	13	Vhl_11279725	>blimp-1	0.83	+	# GTAGAGCAAGTG	0.276815223	0.997896845	3008384655
chr2R	6987698	6987710	13	vimar_6985712	>blimp-1	0.83	+	# GTATTGCAAGTG	0.276815223	0.997896845	2198692345
chr2R	13533310	13533322	13	Vmat_13532989	>blimp-1	0.77	+	# GTAGCGAAAATA	0.83555333	0.997896845	2229538473
chr2R	7565914	7565926	13	Vps13_7566809	>blimp-1	0.76	+	# ATAGTGAGAATG	0.904056084	0.997896845	2737230795
chr2R	22112886	22112898	13	Vrp1_22112791	>blimp-1	0.77	+	# GTATAGAAATTG	0.83555333	0.997896845	2856076896
chr2R	7488209	7488221	13	wech_7486328	>blimp-1	0.77	+	# GTAGAGAAACTT	0.83555333	0.997896845	2482230709
chr2R	7488079	7488091	13	wech_7486328	>blimp-1	0.79	-	# GAAGTTAAAGTC	0.572058087	0.997896845	3533923039
chr2R	22378992	22379004	13	wrapper_22379637	>blimp-1	0.76	+	# ATGGTGAATGTG	0.904056084	0.997896845	2524615341
chr2R	9409599	9409611	13	wun_9409492	>blimp-1	0.76	-	# GCAGTGAACTTG	0.904056084	0.997896845	2710384612
chr2R	23379914	23379926	13	yellow-d2_23381197	>blimp-1	0.77	-	# GGATTGAAGGTG	0.83555333	0.997896845	2544999991
chr2R	24069729	24069741	13	yki_24068485	>blimp-1	0.78	+	# ATACTGAAAGTA	0.735302954	0.997896845	2267384613
chr2R	15816513	15816525	13	Zasp52_15814917	>blimp-1	0.75	+	# AAAGCAAAAGTG	0.942814221	0.997896845	2244538486
chr2R	12651743	12651755	13	ZnT49B_12652805	>blimp-1	0.77	+	# GCCGTGAAAATG	0.83555333	0.997896845	2462846154
chr2R	12651682	12651694	13	ZnT49B_12652805	>blimp-1	0.83	-	# GTAGTGAAACAG	0.276815223	0.997896845	2459999999
chr3L	5145814	5145826	13	Aats-ala-m_5146098	>blimp-1	0.81	+	# AAAGTGAAAGCG	0.374862293	0.997896845	2762076919
chr3L	2652721	2652733	13	Aats-pro_2651850	>blimp-1	0.78	+	# GAAGTCGAAGTG	0.735302954	0.997896845	2105230785
chr3L	16420408	16420420	13	Aats-tyr_16419302	>blimp-1	0.77	-	# CTAGAGGAAGTG	0.83555333	0.997896845	240615381
chr3L	9421749	9421761	13	aay_9423253	>blimp-1	0.75	+	# TTAGTGGAAGTC	0.942814221	0.997896845	2050230758
chr3L	1618015	1618027	13	ABCB7_1618414	>blimp-1	0.75	-	# CTCGTGAATGTG	0.942814221	0.997896845	3172230769
chr3L	16648677	16648689	13	Abl_16647882	>blimp-1	0.75	+	# TTAGTGTAAGCG	0.942814221	0.997896845	2733538463
chr3L	21173756	21173768	13	Ac78C_21171930	>blimp-1	0.76	+	# GGTGTGAAAGTC	0.904056084	0.997896845	2619230816
chr3L	21146780	21146792	13	Ac78C_21145921	>blimp-1	0.76	+	# GTGGTGAAAGGA	0.904056084	0.997896845	3415000019
chr3L	3817460	3817472	13	Acp63F_3816354	>blimp-1	0.75	+	# CTTGTGAATGTG	0.942814221	0.997896845	4241230749
chr3L	3816993	3817005	13	Acp63F_3816354	>blimp-1	0.76	-	# ATGGTGAAGGTG	0.904056084	0.997896845	4066000017
chr3L	4253127	4253139	13	ago_4252051	>blimp-1	0.76	-	# GTAGAAAAAGGG	0.904056084	0.997896845	2508153801
chr3L	15553163	15553175	13	AGO2_15554113	>blimp-1	0.81	+	# AAAGTAAAAGTG	0.374862293	0.997896845	3534000012
chr3L	7369947	7369959	13	akirin_7370340	>blimp-1	0.77	+	# CTATTGACAGTG	0.83555333	0.997896845	2052076947
chr3L	7370179	7370191	13	akirin_7370340	>blimp-1	0.75	+	# TTAATGTAAGTG	0.942814221	0.997896845	3137230728
chr3L	7368999	7369011	13	akirin_7370340	>blimp-1	0.78	-	# GCCGTGAAAGTA	0.735302954	0.997896845	2165461516
chr3L	7368919	7368931	13	akirin_7370340	>blimp-1	0.76	-	# GTCTTGAAAGTC	0.904056084	0.997896845	3175999937
chr3L	1646535	1646547	13	alphaCOP_1645199	>blimp-1	0.76	+	# ATAGTGAAGATG	0.904056084	0.997896845	2454000083
chr3L	1645964	1645976	13	alphaCOP_1645199	>blimp-1	0.77	-	# GTACATAAAGTG	0.83555333	0.997896845	2090076946
chr3L	20312545	20312557	13	alphaSnap_20313632	>blimp-1	0.75	-	# GGAGTGTAAATG	0.942814221	0.997896845	250200003
chr3L	21681186	21681198	13	Als2_21679755	>blimp-1	0.78	-	# CGAGTGAAATTG	0.735302954	0.997896845	2295692357
chr3L	7717916	7717928	13	Ank2_7716324	>blimp-1	0.77	+	# GGAGTGAAATTT	0.83555333	0.997896845	2345615371
chr3L	16484436	16484448	13	aos_16483650	>blimp-1	0.83	+	# GTAGTAAAAATG	0.276815223	0.997896845	2946846133
chr3L	11098204	11098216	13	APP-BP1_11098412	>blimp-1	0.75	+	# GTTGTGAAATTA	0.942814221	0.997896845	3220923112
chr3L	11098413	11098425	13	APP-BP1_11098629	>blimp-1	0.81	-	# AAAGTGAAAGTC	0.374862293	0.997896845	2024769231
chr3L	12419407	12419419	13	ArfGAP1_12417580	>blimp-1	0.76	+	# GCAGTGACAGAG	0.904056084	0.997896845	2623384656
chr3L	9050403	9050415	13	Argk_9050356	>blimp-1	0.77	-	# TTAGTAAAAGGG	0.83555333	0.997896845	2901615413
chr3L	8116430	8116442	13	Arp3_8115902	>blimp-1	0.77	-	# GTAGCAAAAATG	0.83555333	0.997896845	2661000023
chr3L	8117189	8117201	13	Arp3_8115902	>blimp-1	0.8	-	# GAATTTAAAGTG	0.450375563	0.997896845	2194230749
chr3L	18902095	18902107	13	arx_18901554	>blimp-1	0.8	-	# GCAGCGAAAGTA	0.450375563	0.997896845	433799999
chr3L	19617971	19617983	13	asf1_19618894	>blimp-1	0.84	+	# GTCGCGAAAGTG	0.236154231	0.997896845	3516153879
chr3L	19600702	19600714	13	ash1_19598755	>blimp-1	0.75	+	# GTGTTGATAGTG	0.942814221	0.997896845	2098153854
chr3L	19599923	19599935	13	ash1_19598755	>blimp-1	0.77	+	# GCAATGAAGGTG	0.83555333	0.997896845	3785615424
chr3L	19600649	19600661	13	ash1_19598755	>blimp-1	0.85	-	# GTAGTCAAAGTT	0.170255383	0.997896845	3146153881
chr3L	18559977	18559989	13	AstC-R1_18560258	>blimp-1	0.8	+	# AGAGAGAAAGTG	0.450375563	0.997896845	2112230727
chr3L	18503148	18503160	13	AstC-R2_18502557	>blimp-1	0.76	-	# TTTATGAAAGTG	0.904056084	0.997896845	3586076902
chr3L	12806156	12806168	13	Atg1_12805116	>blimp-1	0.79	-	# GAAGAGAAAGAG	0.572058087	0.997896845	2096230783
chr3L	12806274	12806286	13	Atg1_12805116	>blimp-1	0.75	-	# CTAGTGAGGGTG	0.942814221	0.997896845	2136615346
chr3L	18747822	18747834	13	Atg3_18748687	>blimp-1	0.77	-	# GTAAAGAAAGTT	0.83555333	0.997896845	2354461585
chr3L	9728162	9728174	13	ATPsyn-b_9729999	>blimp-1	0.77	+	# TGAGTGATAGTG	0.83555333	0.997896845	2762692337
chr3L	9729038	9729050	13	ATPsyn-b_9729999	>blimp-1	0.77	-	# ATAATGAAGGTG	0.83555333	0.997896845	2513692319
chr3L	4682614	4682626	13	axo_4681458	>blimp-1	0.78	+	# ATAGTGAAAATA	0.735302954	0.997896845	3401769143
chr3L	4682479	4682491	13	axo_4681458	>blimp-1	0.79	-	# GAGGTCAAAGTG	0.572058087	0.997896845	3263538416
chr3L	21433918	21433930	13	barc_21433134	>blimp-1	0.79	-	# CGACTGAAAGTG	0.572058087	0.997896845	3153230745
chr3L	14429167	14429179	13	bbg_14427378	>blimp-1	0.81	+	# CAAGTGAAAGTT	0.374862293	0.997896845	2317076952
chr3L	14428713	14428725	13	bbg_14427378	>blimp-1	0.75	-	# GTACTTTAAGTG	0.942814221	0.997896845	2400230809
chr3L	14429148	14429160	13	bbg_14427378	>blimp-1	0.81	-	# AAACTGAAAGTG	0.374862293	0.997896845	2952307676
chr3L	14477275	14477287	13	bbg_14476688	>blimp-1	0.76	-	# GCAGTGAACTTG	0.904056084	0.997896845	3395538486
chr3L	17034103	17034115	13	beg_17035668	>blimp-1	0.82	-	# GTTGTGAAATTG	0.316875313	0.997896845	2612230778
chr3L	15304232	15304244	13	Best3_15302785	>blimp-1	0.8	+	# TAACTGAAAGTG	0.450375563	0.997896845	2697999968
chr3L	19259458	19259470	13	Bet1_19261394	>blimp-1	0.79	+	# ATAGTTAAAGTA	0.572058087	0.997896845	3405538419
chr3L	6234760	6234772	13	BG642312_6233381	>blimp-1	0.81	+	# AAAGTGAAAGGG	0.374862293	0.997896845	3892538483
chr3L	5642029	5642041	13	Blimp-1_5643647	>blimp-1	0.79	+	# CAAGTGCAAGTG	0.572058087	0.997896845	2889230714
chr3L	5642035	5642047	13	Blimp-1_5643647	>blimp-1	0.79	+	# CAAGTGCAAGTG	0.572058087	0.997896845	2977923031
chr3L	5642927	5642939	13	Blimp-1_5643647	>blimp-1	0.83	-	# GTTGTGAAAGCG	0.276815223	0.997896845	2250538455
chr3L	5635792	5635804	13	Blimp-1_5636015	>blimp-1	0.79	+	# CAAGTGCAAGTG	0.572058087	0.997896845	3563923065
chr3L	18869616	18869628	13	Blos3_18870224	>blimp-1	0.76	-	# GTAGGGACAGTA	0.904056084	0.997896845	3113384586
chr3L	10878411	10878423	13	Blos4_10879085	>blimp-1	0.76	+	# GTAGCGATAGTA	0.904056084	0.997896845	3629230845
chr3L	17422032	17422044	13	blot_17421514	>blimp-1	0.77	+	# GTATTTAAAGCG	0.83555333	0.997896845	2772615343
chr3L	17417535	17417547	13	blot_17415811	>blimp-1	0.76	+	# ATCGTGGAAGTG	0.904056084	0.997896845	2014692352
chr3L	11719973	11719985	13	Bmcp_11720934	>blimp-1	0.77	-	# ATCGTGAAAGTC	0.83555333	0.997896845	3283461599
chr3L	14787009	14787021	13	bmm_14786412	>blimp-1	0.77	-	# GCACTGAATGTG	0.83555333	0.997896845	2082307733
chr3L	14787819	14787831	13	bmm_14786412	>blimp-1	0.76	-	# GCAGTGAAGCTG	0.904056084	0.997896845	2250384567
[truncated: 2,933 more rows]
